# 1 Systematic Analysis of Metabolic Pathway Distributions of Bacterial Energy Reserves

2

3 Liang Wang<sup>1,2\*</sup>, Jianye Yang<sup>1</sup>, Yue Huang<sup>1</sup>, Qinghua Liu<sup>2</sup>, Yaping Xu<sup>1</sup>, Xue Piao<sup>1,3</sup>, Michael  
4 J. Wise<sup>4,5</sup>

5

6 <sup>1</sup>Department of Bioinformatics, School of Medical Informatics, Xuzhou Medical University,  
7 Xuzhou, Jiangsu Province, 221000, China

8 <sup>2</sup>Jiangsu Key Lab of New Drug Research and Clinical Pharmacy, Xuzhou Medical University,  
9 Xuzhou, Jiangsu Province, 221000, China

10 <sup>3</sup>School of Information and Control Engineering, China University of Mining and  
11 Technology, Xuzhou, Jiangsu, 221116, China

12 <sup>4</sup>Department of Computer Science and Software Engineering, University of Western  
13 Australia, Perth 6009, WA, Australia

14 <sup>5</sup>Department of Computer Science and Software Engineering, University of Western  
15 Australia, Perth 6009, WA, Australia

16

17 \*For correspondence, please refer to Dr. Liang Wang at [leonwang@xzhmu.edu.cn](mailto:leonwang@xzhmu.edu.cn)

18

## 19 Abstract

20

21 Metabolism of energy reserves are essential for bacterial functions such as pathogenicity,  
22 metabolic adaptation, and environmental persistence, *etc.* Previous bioinformatics studies  
23 have linked gain or loss of energy reserves such as glycogen and polyphosphate (polyP) with  
24 host-pathogen interactions and bacterial virulence based on a comparatively small number of  
25 bacterial genomes or proteomes. Thus, understanding the distribution patterns of energy  
26 reserves metabolism across bacterial species provides a shortcut route to look into bacterial  
27 lifestyle and physiology theoretically. So far, five major energy reserves have been identified  
28 in bacteria due to their effective capacity to support bacterial persistence under nutrient  
29 deprivation conditions, which include wax ester (WE), triacylglycerol (TAG),  
30 polyhydroxyalkanoates (PHA), polyphosphate, and glycogen. Although unknown pathways  
31 directly involved in energy reserves keep being discovered with the continuous endeavour of  
32 molecular microbiologists and it is currently rather clear about the enzymes related with the  
33 metabolism of energy reserves, there is a lack of systematic study of the pathway or key  
34 enzyme distributions of the five energy reserves in bacteria from an evolutionary point of

35 view. With the fast development of sequencing technology, abundant bacterial proteomes are  
36 available in public database now. In this study, we sourced 8214 manually reviewed bacterial  
37 reference proteomes from UniProt database and used statistical models to search homologous  
38 sequences of key enzymes related with energy reserves. The distribution patterns of the  
39 pathways for energy reserves metabolism are visualized in taxonomy-based phylogenetic  
40 trees. According to the study, it was revealed that specific pathways and enzymes are  
41 associated with certain types of bacterial groups, which provides evolutionary insights into  
42 the understanding of their origins and functions. In addition, the study also confirmed that  
43 loss of energy reserves is correlated with bacterial genome reduction. Through this analysis, a  
44 much clearer picture about energy reserves metabolism in bacteria is present, which could  
45 serve a guide for further theoretical and experimental analyses of energy reserves metabolism  
46 in bacteria.

47

#### 48 **Keywords**

49

50 Energy reserve, Hidden Markov model, Evolution, Proteome, Taxonomy

51

52

53

54

55

56

57

58

59

60

61

62

63

64

65

66

67

68

69

## 70 **Introduction**

71

72 Due to the versatility of environmental niches that bacteria colonize through millions of years  
73 adaptation and evolution, bacteria have been equipped with specialized sets of metabolic  
74 pathways so as to live optimally in these environments, which can be reflected in their  
75 characteristic genomes, gene transcription profiles, and also proteomes.<sup>1</sup> Previously,  
76 comparative genomics studies have shown that glycogen metabolism loss could serve as an  
77 indicator for bacterial parasitic lifestyle and polyP metabolism gain seems to link with free-  
78 living lifestyle and stronger bacterial virulence potential.<sup>2,3</sup> In addition, it has been observed  
79 that metabolism loss of glycogen or polyP is associated with shrunk genome size, leading to a  
80 hint of genome reduction trend.<sup>2,4</sup> Both glycogen and polyphosphate are representative  
81 energy reserves in bacteria. Thus, presence or absence of energy reserves in bacteria could be  
82 important for *in silico* analysis of bacterial physiology and lifestyle, especially when large  
83 number of sequenced bacterial genomes are available and many of those are unculturable  
84 through traditional laboratory techniques.

85

86 It is well known now that energy reserves play essential roles in bacteria for their regular  
87 activities to sense and respond to the changing environments with different types of stresses,  
88 such as temperature fluctuation and nutrient deprivation, *etc.*<sup>4</sup> Although there are many  
89 different energy-related compounds, not all of them can be classified as energy reserves.  
90 According to Wilkinson, three principles should be satisfied for a compound to be considered  
91 as an energy reserve, which are: 1) accumulation when energy is over-supplied, 2) utilization  
92 when energy is insufficient, and 3) apparent advantages by consuming the compound when  
93 compared with those without it.<sup>5</sup> Through physiological and biochemical studies, five energy  
94 storage compounds are regarded to meet the criteria, which are WE, TAG, PHAs, polyP and  
95 glycogen.<sup>2,4-6</sup>

96

97 Although several studies have attempted to investigate the distributions of these energy  
98 reserves in bacteria, most of these studies are based on small sets of bacterial genomes or  
99 proteomes. No systematic analysis exists that is based on current available reference  
100 proteomes from the evolutionary point of view.<sup>2,4,7-10</sup> In this study, we collected 8214  
101 manually-reviewed bacterial proteomes from UniProt database<sup>11</sup> and sourced key enzymes  
102 involved directly in the metabolism of energy reserves from public literature and database

103 (Table 1). Full statistical sequence models were constructed *de novo* for these enzymes based  
104 on hidden Markov models via HMMER package, which were then used to screen for  
105 homologous sequences in all bacterial proteomes.<sup>12</sup> All distribution patterns were presented  
106 in **Supplementary Table S1**. In order to gain a clearer view about enzymes distributions of  
107 the enzymes along the evolutionary paths, we incorporated phylogenetic trees with our  
108 dataset via NCBI taxonomy identifiers.<sup>13</sup> Through a combinational analysis of the pathways  
109 in the phylogenetic tree, we identified interesting distribution patterns of energy reserves that  
110 are linked with specific groups of bacteria and their lifestyle potentials, which may improve  
111 our understanding of the functions of energy reserves in bacteria. In addition, systematic  
112 analysis also gives us an overview of enzyme distributions, which could serve a guide for  
113 further theoretical and experimental analyses of energy reserves metabolism in bacteria.

114

## 115 **Materials and Methods**

116

### 117 *Proteomes and enzymes collection*

118

119 Bacterial proteomes were downloaded from UniProt database by using two keywords,  
120 *Bacteria* and *Reference Proteomes*, as filters.<sup>11</sup> A total of 8282 bacterial proteomes were  
121 collected at the downloaded time in 2018 and only 8214 bacterial proteomes were kept due to  
122 outdated taxonomy identifiers that cannot be identified in NCBI taxonomy database when  
123 constructing phylogenetic trees.<sup>13</sup> A complete list of all the bacteria with bacterial names,  
124 UniProt proteome identifiers, proteome sizes, and distribution patterns of enzymes is  
125 available in the **Supplementary Table S1**. As for the metabolism of the five major energy  
126 reserves, only key enzymes are considered. For the synthesis of WE and TAG, wax ester  
127 synthase/acyl-CoA:diacylglycerol acyltransferase (WS/DGAT) is studied while  
128 triacylglycerol lipase (Lip) was screened due to its essential role in the degradation of WE  
129 and TAG.<sup>10,14</sup> For metabolism of another neutral lipid polyhydroxyalkanoates, enzymes PhaA,  
130 PhaB, PhaC are in the synthesis pathway and PhaZ is in the degradation pathway.<sup>15</sup> There are  
131 two different PhaZs, that is, intracellular PhaZ and extracellular PhaZ, both of which are  
132 analysed in this study. As for polyP, the key enzyme PPK1 for synthesis and two degradation  
133 enzymes, intracellular PPK2 and extracellular PPX, are included.<sup>2</sup> Finally, for glycogen  
134 metabolism, two synthesis pathways are considered. The first one involves GlgC, GlgA, and  
135 GlgB.<sup>4</sup> The second pathway is TreS, Pep2, GlgE, and GlgB.<sup>16</sup> Key enzyme Rv3032 in  
136 another pathway related with glycogen metabolism and capsular glucan is only briefly

137 mentioned.<sup>16</sup> In addition, archaeal type GlgB was also included for comparative analysis. For  
138 details of these enzymes, please refer to **Table 1**.

139

#### 140 *De novo construction of HMMs*

141

142 Seed sequences related with metabolism of energy reserves were selected through a  
143 comprehensive up-to-date review of literature and were listed in **Table 1**. These seed proteins  
144 were used for constructing statistical sequence models based on HMMs via HMMER  
145 package.<sup>12</sup> After obtaining sequences for all seed proteins, remote BLAST was performed to  
146 collect homologous sequences for each seed protein from the NCBI non-redundant database  
147 of protein sequences.<sup>17</sup> Perl script nrdb90.pl was used to remove the homologous sequences  
148 with more than 90% similarity from the selected proteins.<sup>18</sup> The standalone command-line  
149 version of MUSCLE was used so the MSAs were done automatically.<sup>19</sup> Heads or tails of  
150 multiple sequence alignments tend to be more inconsistent.<sup>20</sup> Thus, all MSAs were manually  
151 edited to remove heads and tails by using JalView.<sup>21</sup> HMMER was selected for the  
152 construction of HMMs through hmmbuild command. Since HMMER only recognizes  
153 STOCKHOLM format, all MSAs results were converted from FASTA to STOCKHOLM  
154 format. For searching homologs in bacterial proteomes, routine procedures are performed by  
155 following HMMER User's Guide [eddylab.org/software/hmmer3/3.1b2/Userguide.pdf](http://eddylab.org/software/hmmer3/3.1b2/Userguide.pdf).  
156 Results obtained from HMM screening were present in **Supplementary Table S1**. The  
157 presence (copy numbers) or absence of a specific enzyme in a certain bacterial proteome is  
158 present.

159

#### 160 *Data visualization*

161

162 Phylogenetic trees were first constructed based on NCBI taxonomy identifiers for all bacteria  
163 in this study via commercial web server PhyloT <https://phylot.biobyte.de/>, which were then  
164 visualized through the online interactive Tree of Life (iTOL) server <https://itol.embl.de/>.<sup>22</sup>  
165 Distribution patterns of enzymes and their combinations in terms of energy reserves were  
166 added to the trees through iTOL pre-defined tol\_simple\_bar template.<sup>22</sup>

167

#### 168 *Statistical analysis*

169

170 Unpaired two-tailed Student's *t*-test was used for statistical analysis. Significant difference  
171 was defined as *P*-value < 0.05.

172

## 173 **Results**

174

### 175 *Wax ester and triacylglycerol*

176

177 The key enzyme that is involved in WE and TAG synthesis in bacteria is WS/DGAT.  
178 Through the screening of HMM-based statistical models, 950 out of 8214 bacterial species  
179 harbour single copy or multiple copies of WS/DGAT homologs, which are mainly present in  
180 phylum *Actinobacteria* and the super-phylum *Proteobacteria*. Only sporadic bacteria in  
181 groups such as FCB (a.k.a *Sphingobacteria*) and PVC (a.k.a. *Planctobacteria*), etc. have  
182 WS/DGAT. No species belonging to phylum *Firmicutes* has WS/DGAT. As for the  
183 unclassified bacteria, although no WS/DGAT is identified, they will not be studied due to  
184 their unclear nature at current stage. For details, please refer to **Figure 1(A)**. By comparing  
185 the proteome sizes of bacteria species with or without WS/DGAT, we found that bacteria  
186 with WS/DGAT have average proteome size of 5200 proteins/proteome while those without  
187 WS/DGAT have average proteome size of 3047 proteins/proteome (*P*-value<0.001).

188

189 [insert Figure 1.]

190

191 Within the major phylum of *Proteobacteria*, WS/DGAT is not evenly distributed and  $\gamma$ -  
192 *Proteobacteria* have more species with multi-copy WS/DGAT. In addition, two orders  
193 *Rhodobacterales* (305 species) and *Enterobacterales* (168 species) that belong to  $\alpha$ - and  $\gamma$ -  
194 *Proteobacteria* phylum, respectively do not have any WS/DGAT except for one species  
195 *Ahrensia* sp. R2A130. As for the phylum *Actinobacteria*, three WS/DGAT abundant regions  
196 (R1, R2, and R3) and one WS/DGAT absence region (R4) in the phylogenetic tree are worth  
197 of further exploration. R1 includes only one family *Mycobacteriaceae* (115 species) in which  
198 bacteria have up to 24 homologs of WS/DGAT. R2 includes families of *Dietziaceae*,  
199 *Gordoniaceae*, *Nocardiaceae*, *Tsukamurellaceae*, and *Williamsiaceae*. R3 includes families  
200 of *Nocardioideae* and *Pseudonocardiales*. R4 is the family *Corynebacteriaceae* (69 species)  
201 that have WS/DGAT-free bacteria only. As for the degradation of TAG and probable  
202 degradation of WE in bacteria, Lip plays important roles. Only 394 bacterial species have the

203 enzyme. Distribution analysis showed that this enzyme is almost exclusively present in the  
204 super phylum *Proteobacteria*, especially in the  $\beta$ -,  $\gamma$ -, and  $\delta$ -*Proteobacteria* phylums.

205

#### 206 *Polyhydroxyalkanoates*

207

208 Three enzymes (PhaA, PhaB and PhaC) involve in the synthesis of PHAs and two enzymes  
209 (intracellular PhaZ and extracellular PhaZ) involve in the utilization of PHAs in bacteria. In  
210 this study, we focused on the distribution patterns of PHA synthesis pathway PhaABC and  
211 also the two degradation enzymes. Please refer to **Figure 1(B)** for details. Preliminary  
212 analysis showed that 836 bacterial species with average proteome size of 4891  
213 proteins/proteome have PhaABC pathway while 536 bacterial species with average proteome  
214 size of 718 proteins/proteome do not have the pathway ( $P$ -value<0.001). In addition, when  
215 PhaABC is missing in bacteria, degradation enzymes are also absent except for one species  
216 *Chloroflexi bacterium*. Evolutionary analysis based on phylogenetic tree found that complete  
217 PHA synthesis and degradation pathway mainly distribute in  $\alpha$ - and  $\beta$ -*Proteobacteria*. Some  
218 bacteria in phylum *Actinobacteria* and genus *Bacillus* also harbor PhaABC synthesis pathway.  
219 However, intracellular PhaZ is rarely present in these species. That is the major difference  
220 when comparing with *Proteobacteria* phylums.

221

#### 222 *Polyphosphate*

223

224 Three key enzymes are related with polyP metabolism. PPK1 is responsible for polyP  
225 synthesis. A total of 5209 bacterial species has PPK1. PPK2 and PPX are used for polyP  
226 degradation intracellularly and extracellularly, respectively. 3330 bacterial species have  
227 PPK1, PPK2 and PPX enzymes while 2215 bacteria species do not have any of the three  
228 enzymes. Their average proteome sizes are 4459 proteins/proteome and 1618  
229 proteins/proteome, respectively ( $P$ -value<0.001). In our analysis, we independently reviewed  
230 the distribution patterns of the three enzymes along phylogenetic trees and the result is  
231 displayed in **Figure 1(C)**. The three enzymes are widely distributed across bacterial species.  
232 Comparison shows that *Firmicutes* phylum seems to favour PPX more than PPK2 for polyP  
233 degradation. In addition, although it was observed that several regions have missing synthesis  
234 enzyme or degradation enzyme, only *Mollicutes* class (94 bacterial species) shows apparent  
235 lack of the three polyP metabolism enzymes in the phylogenetic tree.

236



237 *Glycogen*

238

239 Glycogen metabolism in bacteria has multiple pathways, which includes the classical  
240 pathway (GlgC, GlgA, GlgB, GlgP and GlgX), trehalose pathway (TreS, Pep2, GlgE, and  
241 GlgB), and Rv3032 pathway. In this study, we only focused on the first two glycogen  
242 synthesis pathways and compares their distribution patterns in bacteria. In addition, there are  
243 two types of glycogen branching enzymes. One is the common bacterial GlgB belonging to  
244 GH13 in CATH database and the other one is known as archaeal GlgB belonging to GH57 in  
245 CATH database.<sup>23</sup> We also look into their distribution patterns in bacteria since GlgB is  
246 essential in determining glycogen branched structure. Our study showed that 3924 bacteria  
247 has classical synthesis pathway (GlgC, GlgA, and GlgB) and their average proteome size is  
248 4163 proteins/proteome while only 489 bacterial species (average proteome size of 1050  
249 proteins/proteome) do not have these enzymes ( $P$ -value<0.001). Comparison of the two  
250 synthesis pathways confirmed that classical synthesis pathways are widely distributed across  
251 species. Random loss of the pathways can be inferred from **Figure 1(D)**. In contrast,  
252 trehalose pathway is tightly associated with *Actinobacteria* phylum with rarely sporadic  
253 presence in other bacterial species. As for the two GlgBs, GH13 GlgB is widely distributed in  
254 4451 bacterial species with a trend of random loss while GH57 GlgB is found in 755 bacteria  
255 that are mainly belonging to groups such as *Terrabacteria* and PVC, etc.

256

## 257 **Discussion**

258

259 From an evolutionary point of view, if an organism can obtain compounds from other sources,  
260 it will tend to discard its own biosynthetic pathway.<sup>24</sup> For example, *Rickettsia* species,  
261 *Mycoplasma* species, and *Buchnera*, etc. have extensively reduced genome and abundant  
262 energy metabolism pathways are eliminated.<sup>24</sup> In addition, although common belief is that  
263 organism will evolve toward complexity, recent analysis supported that reduction and  
264 simplification could be the dominant mode of evolution while complexification is just a  
265 transit stage based on the neutral genetic loss and streamlining hypothesis.<sup>25</sup> Independent  
266 analyses of the distribution patterns of the five energy reserves in bacteria found a consistent  
267 and statistically significant correlation between energy reserve loss and reduced proteome  
268 size. Previous studies have already reported such a correlation for glycogen and polyP in  
269 bacteria.<sup>2,4</sup> In this study, we extend this conclusion by the addition of the reserves WE, TAG,  
270 and PHAs, which has not been reported before. It has been confirmed that most of bacteria



271 losing energy reserve metabolism pathways tend to have a niche-dependent or host-  
272 dependent lifestyle, which is the case in our study<sup>2,4,6</sup> Thus, by simply looking into bacterial  
273 energy reserve metabolism, we could obtain preliminary views in terms of their lifestyles,  
274 though other factors and evidences are required for verification.

275

276 WS/DGAT is a bifunctional enzyme and key to the biosynthesis of WE and TAG in bacteria.  
277 It was previously thought that WE and TAG are very uncommon lipid storage compounds in  
278 bacteria when compared with plants and animals until the novel enzyme was identified.<sup>10</sup>  
279 From our analysis, it can be seen that many bacteria belonging to both Gram-positive and  
280 Gram-negative categories have the ability to synthesize WE and TAG. However, studies  
281 about WS/DGAT are mainly restricted to *Mycobacteria* genus (*Actinobacteria* phylum) and  
282 *Acinetobacter* genus ( $\gamma$ -Proteobacteria phylum) due to their clinical significance and  
283 industrial use potentials, respectively. It is also apparent to notice that WS/DGAT in phylum  
284 *Actinobacteria* tend to have number of homologs far more than other phylums, especially for  
285 the bacteria in the three regions (R1, R2, and R3) mentioned above, which include  
286 *Mycobacteriaceae*, *Dietziaceae*, *Gordoniaceae*, *Nocardiaceae*, *Tsukamurellaceae*,  
287 *Williamsiaceae*, *Nocardioidaceae* and *Pseudonocardiales*. On the other hand, no WS/DGAT  
288 is found in the family of *Corynebacteriaceae* (R4), although *Corynebacteriaceae* is closely  
289 related with *Mycobacteriaceae*.<sup>26</sup> In addition, bacteria in phylum *Firmicutes* do not have any  
290 WS/DGAT enzyme, neither. Screen of Phospholipid:diacylglycerol acyltransferase (PDAT),  
291 an enzyme that catalyses the acyl-CoA-independent formation of triacylglycerol in yeast and  
292 plants, found no homologs in bacteria at all.<sup>27</sup> Thus, this enzyme is exclusively present in  
293 eukaryotic organisms.

294

295 The family *Corynebacteriaceae* contains the genera *Corynebacterium* and monospecific  
296 genus *Turicella*.<sup>28</sup> *Mycobacterium tuberculosis* is the dominant species in *Mycobacteriaceae*  
297 (97 species). Mycolic acid (MA) with wax ester is the oxidized form of MA in  
298 *Mycobacterium tuberculosis*, which forms an integrated cell wall and plays essential role in  
299 host invasion, environmental persistence, and also drug resistance. In addition,  
300 *Mycobacterium tuberculosis* also relies on wax ester for dormancy, although WE function in  
301 *M. tuberculosis* requires more investigations. Thus, abundance of WS/DGAT in  
302 *Mycobacteriaceae* has selective advantages in evolution. Considering the abundance of wax  
303 ester and its slow degradation, it could also contribute to the long-term survival (more than  
304 360 days) of *M. tuberculosis* in environment.<sup>6</sup> On the other hand, *Corynebacterium* do not

305 rely on oxidized mycolic acid while *Turicella* does not have mycolic acid at all.<sup>29,30</sup> Thus,  
306 there is no need for them to be equipped with the WS/DGAT enzyme. However, how  
307 *Mycobacteriaceae* gain WS/DGAT or *Corynebacteriaceae* lose it is not clear and needs more  
308 studies. As for *Firmicutes*, the low G+C counterpart of the high G+C *Actinobacteria*, most of  
309 its species can form endospores and are resistance to extreme environmental conditions such  
310 as desiccation, temperature fluctuation, and nutrient deprivation, *etc.*<sup>31</sup> Thus, they may not  
311 need compounds such as WE or TAG for storing energy and dealing with harsh external  
312 conditions. How G+C content in the two phylums may impact on the gain or loss of wax  
313 ester metabolism is not known.

314

315 PHAs are a group of compounds that include but not limited to components such as  
316 polyhydroxybutyrate (PHB) and polyhydroxyvalerate (PHV), *etc.*, among which PHB is the  
317 most common and most prominent member in bacteria.<sup>32,33</sup> Synthesis of PHB involves PhaA,  
318 PhaB and PhaC.<sup>32</sup> In addition, there are two types of PHB degradation enzymes, intracellular  
319 PhaZ and extracellular PhaZ.<sup>34</sup> Phylogenetic analysis revealed that PHB metabolism is  
320 mainly in *Proteobacteria* and *Actinobacteria* (**Figure 1(B)**). Moreover, *Bacillus* genus is also  
321 abundant in PHB metabolism. The major difference between *Proteobacteria* and  
322 *Actinobacteria* is that *Actinobacteria* rarely has intracellular PhaZ and relies mainly on  
323 extracellular PhaZ for PHB degradation. The reason behind the difference could be that  
324 *Actinobacteria* has other mechanisms for PHB degradation intracellularly. In addition,  
325 *Actinobacteria* are widespread in water and soil and frequently experience nutrient  
326 shortage.<sup>35</sup> Thus, they are more focused on storing PHB intracellularly as energy reserve and  
327 synthesizing extracellular PhaZ to utilize environmental PHBs released by other organisms.<sup>36</sup>  
328 By doing so, they could have great advantage over other organisms in term of viability under  
329 harsh conditions. It is also interesting to notice that *Bacillus* genus accumulates PHB  
330 intracellularly and has been developed for industrial production of PHB.<sup>37</sup>

331

332 PolyP has been known to be ubiquitous in different life domains and claimed to be present in  
333 all cells in nature due to their essential roles as energy and phosphate sources.<sup>2</sup> Although a  
334 bunch of enzymes are directly linked with polyP metabolism, we only focused on PPK1,  
335 PPK2, and PPX in this study because they are most abundant and essential enzymes. **Figure**  
336 **1(C)** gives an overview of the universally wide distribution of the three enzymes. Although  
337 2215 species across the phylogenetic tree are lack of all three enzymes, an apparent gap was  
338 only spotted in the phylum *Tenericutes* and was further confirmed to be *Mollicutes*. A

339 previous analysis of 944 bacterial proteomes have shown that bacteria with complete loss of  
340 polyP metabolism (PPK1, PPK2, PAP, SurE, PPX, PpnK and PpgK) pathway are heavily  
341 host-dependent and tend to be obligate intracellular or symbiotic.<sup>2</sup> Consistently, *Mollicutes* is  
342 a group of parasitic bacteria that are evolved from a common *Firmicutes* ancestor through  
343 reductive evolution.<sup>38</sup> From here, we can infer that not only loss of complete metabolism  
344 pathway, but also even loss of key enzymes in an energy reserve metabolism could give a  
345 hint about bacterial lifestyle.

346

347 For glycogen metabolism, we compared two synthesis pathways, the classical pathway (GlgC,  
348 GlgA and GlgB) and the newly identified trehalose-related pathway (TreS, Pep2, GlgE and  
349 GlgB).<sup>4,16</sup> Although initial analysis via BLAST search showed that GlgE pathway is  
350 represented in 14% of sequenced genomes from diverse bacteria in 2011, our studies showed  
351 that, when searching for the complete GlgE pathway by including another three enzymes, it is  
352 dominantly restricted to *Actinobacteria* phylum while classical pathway is widely present in  
353 the tree as seen in **Figure 1(D)**.<sup>16</sup> In addition, the two types of GlgBs also show interesting  
354 patterns. Although GH13 GlgB is widely identified in 54.18% bacteria, GH57 GlgB is only  
355 present in 9.19% bacteria with skewed distribution in groups such as *Terrabacteria* phylum  
356 and PVC group, *etc.* Another study of 427 archaea proteomes found that the 11 archaea has  
357 GH13 GlgB while 18 archaea has GH57 GlgB (unpublished data). Thus, the two GlgBs are  
358 rarely present in archaea and mainly exist in bacteria. However, why trehalose-related  
359 glycogen metabolism pathway is associated with *Actinobacteria* phylum still needs more  
360 experimental exploration.

361

## 362 **Conclusions**

363

364 Distribution patterns of key enzymes and their combined pathways in bacteria provided a  
365 comprehensive view of how energy reserves are present and absent during evolutionary  
366 process. In general, polyP is most abundant energy reserve in bacteria while polysaccharide  
367 glycogen is the second most abundant compound. However, glycogen has multiple synthesis  
368 pathways and its metabolism could have more impacts on bacterial physiology due to such  
369 flexibility. For the three neutral lipids, there are comparatively minor energy reserves in  
370 bacteria and mainly constrained in super phylum *Proteobacteria* and phylum *Actinobacteria*.  
371 Within the group, more bacteria have the capacity to accumulate WE and TAG rather than  
372 PHB due to the widespread distribution of *wax-dgaT* homologs. polyP only acts as a transit

373 energy reserve while neutral lipids are more sustainable energy provider.<sup>4,39</sup> Thus, neutral  
374 lipids could be major player for bacterial persistence under harsh conditions such terrestrial  
375 and aquatic environments. As for glycogen, its ability for bacterial environmental viability is  
376 still controversial due to the consideration of its interior structures. Its widespread distribution  
377 in bacteria also indicated that its metabolism is tightly linked with bacterial essential  
378 activities. In sum, through this study, we obtained a much clearer picture about how energy  
379 reserves are associated with certain types of bacteria. Further investigation via incorporating  
380 bacterial physiology and lifestyle could supply much more feasible explanations to illustrate  
381 these linkages, although experimental evidences are indispensable to confirm these  
382 theoretical analyses.

383

### 384 **Acknowledgements**

385

386 The work was supported by Startup Foundation for Excellent Researchers at Xuzhou Medical  
387 University [No. D2016007], Nature and Science Foundation for Colleges and Universities of  
388 Jiangsu Province [No. 16KJB180028], Innovative and Entrepreneurial Talent Scheme of  
389 Jiangsu Province [No. 53053312], and Nature and Science Foundation of Jiangsu Province  
390 (2018)

391

### 392 **Author Contributions**

393

394 LW conceived the core idea of this study. LW, MJW, JY, YH, QL, and YX did all data  
395 collection, data visualization, and statistical analysis.

396

### 397 **Declaration of Conflicting Interests**

398

399 The author declares that there is no conflict of interests.

400 **Table 1** Key enzymes and corresponding UniProt sequences used in this study for statistical modelling via HMMER package.

401

| Reference Species                   | Gene                         | Enzyme                                                             | Length | UniProt ID |
|-------------------------------------|------------------------------|--------------------------------------------------------------------|--------|------------|
| <i>Haladaptatus paucihalophilus</i> | <i>ppk1</i>                  | Polyphosphate kinase                                               | 707    | E7QTB5     |
| <i>Thiomicrospira cyclica</i>       | <i>ppk2</i>                  | Polyphosphate kinase 2                                             | 264    | F6DAB2     |
| <i>Metallosphaera sedula</i>        | <i>gppA</i>                  | Ppx/GppA phosphatase                                               | 420    | A4YFE8     |
| <i>Haloferax massiliensis</i>       | <i>glgC</i>                  | Glucose-1-phosphate adenylyltransferase                            | 322    | A0A0D6JRD4 |
| <i>Pyrococcus abyssi</i>            | <i>glgA</i>                  | Glycogen synthase                                                  | 437    | Q9V2J8     |
| <i>Thermococcus kodakaraensis</i>   | <i>glgB</i> *                | 1,4-alpha-glucan branching enzyme (GH57)                           | 675    | Q5JDJ7     |
| <i>Escherichia coli</i>             | <i>glgB</i>                  | 1,4-alpha-glucan branching enzyme (GH13)                           | 728    | P07762     |
| <i>Mycobacterium tuberculosis</i>   | <i>treS</i>                  | Trehalose synthase/amylase                                         | 601    | P9WQ19     |
| <i>Mycobacterium tuberculosis</i>   | <i>pep2</i>                  | Maltokinase                                                        | 455    | Q7DAF6     |
| <i>Picrophilus torridus</i>         | <i>glgE</i>                  | Alpha-1,4-glucan: maltose-1-phosphate maltosyltransferase          | 630    | Q6L2Z8     |
| <i>Mycobacterium tuberculosis</i>   | <i>Rv3032</i>                | Glycogen synthase                                                  | 414    | P9WMY9     |
| <i>Haloferax mediterranei</i>       | <i>phaA</i>                  | Beta-ketothiolase                                                  | 383    | I3R3D1     |
| <i>Haloarcula hispanica</i>         | <i>phaB</i>                  | Acetoacetyl-CoA reductase                                          | 247    | E1U2R6     |
| <i>Haloarcula hispanica</i>         | <i>phaC</i>                  | PHA synthase subunit C                                             | 474    | G0HQZ6     |
| <i>Burkholderia pseudomallei</i>    | <i>phaZ</i> <sup>&amp;</sup> | Intracellular polyhydroxyalkanoate depolymerase                    | 423    | Q3JIM5     |
| <i>Rhizobium fredii</i>             | <i>phaZ</i>                  | Extracellular polyhydroxyalkanoate depolymerase                    | 369    | G9AII6     |
| <i>Saccharomyces cerevisiae</i>     | <i>PDAT</i> <sup>#</sup>     | Phospholipid: diacylglycerol acyltransferase                       | 661    | P40345     |
| <i>Acinetobacter baylyi</i>         | <i>wax-dgaT</i>              | Wax Ester Synthase/Acyl Coenzyme A: Diacylglycerol Acyltransferase | 458    | Q8GGG1     |

|                               |                                                                                                                                                  |                        |     |        |
|-------------------------------|--------------------------------------------------------------------------------------------------------------------------------------------------|------------------------|-----|--------|
| <i>Pseudomonas aeruginosa</i> | <i>lip</i>                                                                                                                                       | Triacylglycerol lipase | 311 | P26876 |
| 402                           |                                                                                                                                                  |                        |     |        |
| 403                           | * Archaeal type of glycogen branching enzyme (encoded by <i>glgB</i> gene) belonging to GH57 class in CATH database. & Specialized intracellular |                        |     |        |
| 404                           | PHA depolymerase. #TAG synthesis enzyme exclusively present in eukaryotes.                                                                       |                        |     |        |
| 405                           |                                                                                                                                                  |                        |     |        |
| 406                           |                                                                                                                                                  |                        |     |        |
| 407                           |                                                                                                                                                  |                        |     |        |
| 408                           |                                                                                                                                                  |                        |     |        |
| 409                           |                                                                                                                                                  |                        |     |        |
| 410                           |                                                                                                                                                  |                        |     |        |
| 411                           |                                                                                                                                                  |                        |     |        |

## 412 **References**

413

- 414 1. Zhu B, Ibrahim M, Cui Z, et al. Multi-omics analysis of niche specificity provides  
415 new insights into ecological adaptation in bacteria. *The ISME Journal*.  
416 2016;10(8):2072-2075.
- 417 2. Wang L, Yan J, Wise MJ, et al. Distribution Patterns of Polyphosphate Metabolism  
418 Pathway and Its Relationships With Bacterial Durability and Virulence. *Frontiers in*  
419 *Microbiology*. 2018;9.
- 420 3. Henrissat B, Deleury E, Coutinho PM. Glycogen metabolism loss: a common marker  
421 of parasitic behaviour in bacteria? *Trends in Genetics*. 2002;18(9):437-440.
- 422 4. Wang L, Wise MJ. Glycogen with short average chain length enhances bacterial  
423 durability. *Naturwissenschaften*. 2011;98(9):719-729.
- 424 5. Wilkinson J. The problem of energy-storage compounds in bacteria. *Experimental*  
425 *Cell Research*. 1959;7:111-130.
- 426 6. Wang L, Liu Z, Dai S, Yan J, Wise MJ. The Sit-and-Wait Hypothesis in Bacterial  
427 Pathogens: A Theoretical Study of Durability and Virulence. *Frontiers in*  
428 *Microbiology*. 2017;8.
- 429 7. Zhang H, Ishige K, Kornberg A. A polyphosphate kinase (PPK2) widely conserved in  
430 bacteria. *Proceedings of the National Academy of Sciences*. 2002;99(26):16678-  
431 16683.
- 432 8. Whitehead MP, Eagles L, Hooley P, Brown MRW. Most bacteria synthesize  
433 polyphosphate by unknown mechanisms. *Microbiology*. 2014;160(Pt\_5):829-831.
- 434 9. Achbergerová L, Nahálka J. PPK1 and PPK2 — which polyphosphate kinase is older?  
435 *Biologia*. 2014;69(3).
- 436 10. Kalscheuer R, Steinbüchel A. A Novel Bifunctional Wax Ester Synthase/Acyl-  
437 CoA:Diacylglycerol Acyltransferase Mediates Wax Ester and Triacylglycerol  
438 Biosynthesis in *Acinetobacter calcoaceticus* ADP1. *Journal of Biological Chemistry*.  
439 2003;278(10):8075-8082.
- 440 11. UniProt: the universal protein knowledgebase. *Nucleic Acids Research*.  
441 2017;45(D1):D158-D169.
- 442 12. Pearson WR, Eddy SR. Accelerated Profile HMM Searches. *PLoS Computational*  
443 *Biology*. 2011;7(10).
- 444 13. Federhen S. The NCBI Taxonomy database. *Nucleic Acids Research*.  
445 2011;40(D1):D136-D143.



- 446 14. Javed S, Azeem F, Hussain S, et al. Bacterial lipases: A review on purification and  
447 characterization. *Progress in Biophysics and Molecular Biology*. 2018;132:23-34.
- 448 15. Sagong H-Y, Son HF, Choi SY, Lee SY, Kim K-J. Structural Insights into  
449 Polyhydroxyalkanoates Biosynthesis. *Trends in Biochemical Sciences*. 2018.
- 450 16. Chandra G, Chater KF, Bornemann S. Unexpected and widespread connections  
451 between bacterial glycogen and trehalose metabolism. *Microbiology*.  
452 2011;157(6):1565-1572.
- 453 17. McGinnis S, Madden TL. BLAST: at the core of a powerful and diverse set of  
454 sequence analysis tools. *Nucleic Acids Research*. 2004;32(Web Server):W20-W25.
- 455 18. Holm L, Sander C. Removing near-neighbour redundancy from large protein  
456 sequence collections. *Bioinformatics*. 1998;14(5):423-429.
- 457 19. Edgar RC. MUSCLE: multiple sequence alignment with high accuracy and high  
458 throughput. *Nucleic Acids Research*. 2004;32(5):1792-1797.
- 459 20. Wise MJ. No so HoT - heads or tails is not able to reliably compare multiple sequence  
460 alignments. *Cladistics*. 2010;26(4):438-443.
- 461 21. Waterhouse AM, Procter JB, Martin DMA, Clamp M, Barton GJ. Jalview Version 2-a  
462 multiple sequence alignment editor and analysis workbench. *Bioinformatics*.  
463 2009;25(9):1189-1191.
- 464 22. Letunic I, Bork P. Interactive tree of life (iTOL) v3: an online tool for the display and  
465 annotation of phylogenetic and other trees. *Nucleic Acids Research*.  
466 2016;44(W1):W242-W245.
- 467 23. Orengo CA, Michie AD, Jones S, Jones DT, Swindells MB, Thornton JM. CATH – a  
468 hierarchic classification of protein domain structures. *Structure*. 1997;5(8):1093-1109.
- 469 24. Moran NA. Microbial Minimalism. *Cell*. 2002;108(5):583-586.
- 470 25. Wolf YI, Koonin EV. Genome reduction as the dominant mode of evolution.  
471 *BioEssays*. 2013;35(9):829-837.
- 472 26. Pukall R. The Family Dietziaceae. *The Prokaryotes*2014:327-338.
- 473 27. Dahlqvist A, Stahl U, Lenman M, et al. Phospholipid:diacylglycerol acyltransferase:  
474 An enzyme that catalyzes the acyl-CoA-independent formation of triacylglycerol in  
475 yeast and plants. *Proceedings of the National Academy of Sciences*.  
476 2000;97(12):6487-6492.
- 477 28. Kämpfer P. Actinobacteria. *Handbook of Hydrocarbon and Lipid*  
478 *Microbiology*2010:1819-1838.

- 479 29. Marrakchi H, Lanéelle M-A, Daffé M. Mycolic Acids: Structures, Biosynthesis, and  
480 Beyond. *Chemistry & Biology*. 2014;21(1):67-85.
- 481 30. Funke G, Stubbs S, Altwegg M, Carlotti A, Collins MD. *Turicella otitidis* gen. nov.,  
482 sp. nov., a Coryneform Bacterium Isolated from Patients with Otitis Media.  
483 *International Journal of Systematic Bacteriology*. 1994;44(2):270-273.
- 484 31. Galperin MY. Genome Diversity of Spore-Forming Firmicutes. *Microbiology*  
485 *Spectrum*. 2013;1(2).
- 486 32. Verlinden RAJ, Hill DJ, Kenward MA, Williams CD, Radecka I. Bacterial synthesis  
487 of biodegradable polyhydroxyalkanoates. *Journal of Applied Microbiology*.  
488 2007;102(6):1437-1449.
- 489 33. Uchino K, Saito T, Gebauer B, Jendrossek D. Isolated Poly(3-Hydroxybutyrate)  
490 (PHB) Granules Are Complex Bacterial Organelles Catalyzing Formation of PHB  
491 from Acetyl Coenzyme A (CoA) and Degradation of PHB to Acetyl-CoA. *Journal of*  
492 *Bacteriology*. 2007;189(22):8250-8256.
- 493 34. Handrick R, Reinhardt S, Kimmig P, Jendrossek D. The "Intracellular" Poly(3-  
494 Hydroxybutyrate) (PHB) Depolymerase of *Rhodospirillum rubrum* Is a Periplasm-  
495 Located Protein with Specificity for Native PHB and with Structural Similarity to  
496 Extracellular PHB Depolymerases. *Journal of Bacteriology*. 2004;186(21):7243-7253.
- 497 35. Ventura M, Canchaya C, Tauch A, et al. Genomics of Actinobacteria: Tracing the  
498 Evolutionary History of an Ancient Phylum. *Microbiology and Molecular Biology*  
499 *Reviews*. 2007;71(3):495-548.
- 500 36. Manganelli R, García-Hidalgo J, Hormigo D, Arroyo M, de la Mata I. Novel  
501 Extracellular PHB Depolymerase from *Streptomyces ascomycinicus*: PHB  
502 Copolymers Degradation in Acidic Conditions. *PLoS ONE*. 2013;8(8).
- 503 37. Singh G, Kumari A, Mittal A, Yadav A, Aggarwal NK. Poly $\beta$ -Hydroxybutyrate  
504 Production by *Bacillus subtilis* NG220 Using Sugar Industry Waste Water. *BioMed*  
505 *Research International*. 2013;2013:1-10.
- 506 38. Gojobori T, Grosjean H, Breton M, et al. Predicting the Minimal Translation  
507 Apparatus: Lessons from the Reductive Evolution of Mollicutes. *PLoS Genetics*.  
508 2014;10(5).
- 509 39. Finkelstein DB, Brassell SC, Pratt LM. Microbial biosynthesis of wax esters during  
510 desiccation: Adaptation for colonization of the earliest terrestrial environments?  
511 *Geology*. 2010;38(3):247-250.
- 512

513

514

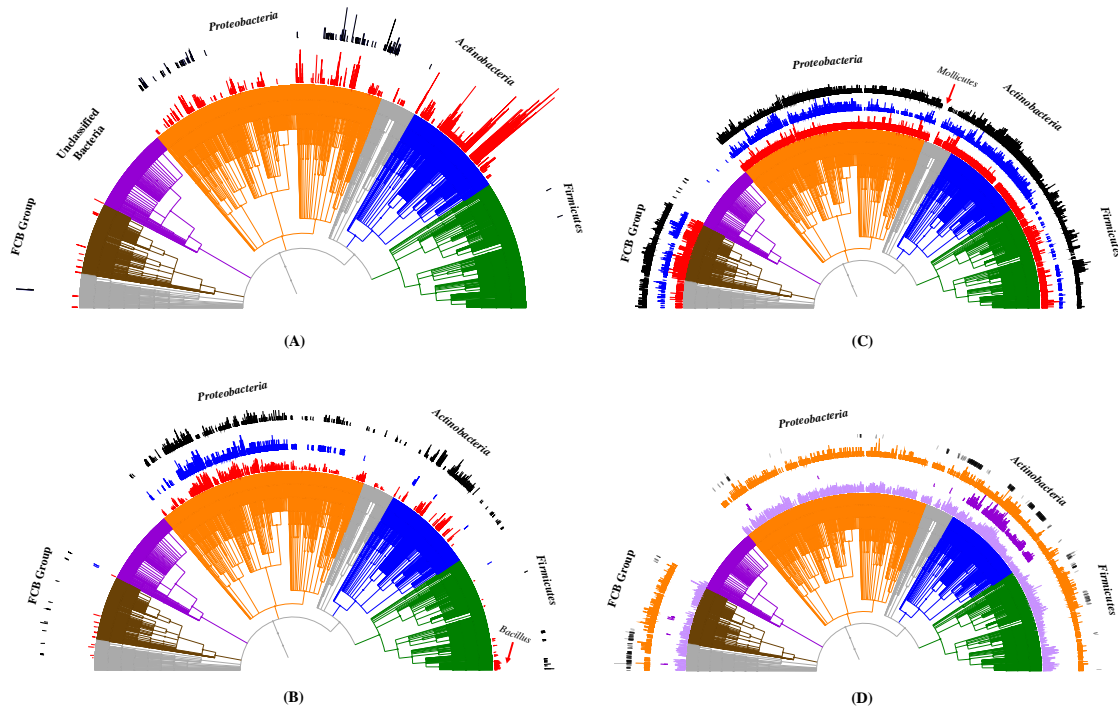

515

516 **Figure 1** Evolutionary analysis of metabolic pathway distributions of energy reserves in 8214  
517 bacterial species. Four groups of bacteria are highlighted, which are *Firmicutes* (green),  
518 *Actinobacteria* (red), *Proteobacteria* (orange), Unclassified Bacteria (violet), and FCB group  
519 (brown). (A) Distribution patterns of key enzyme WS/DGAT (red bar) and Triacylglycerol  
520 lipase Lip (black bar) along the evolutionary tree that is responsible for the synthesis and  
521 utilization of neutral lipids in bacteria. WS/DGAT is abundant in *Actinobacteria* with  
522 multiple homologs while *Firmicutes* do not have any WS/DGAT-harboring organisms.  
523 *Proteobacteria* has moderate number of bacteria with WS/DGAT enzymes. For FCB group  
524 and unclassified bacteria, WS/DGAT is only sporadically present. As for the utilization of  
525 neutral lipids, the enzyme Lip is almost exclusively restricted to the phylum *Proteobacteria*  
526 ( $\beta$ -,  $\gamma$ -,  $\delta$ , and  $\epsilon$ -). Only one organisms belonging to  $\alpha$ -proteobacteria has Lip homologous  
527 enzyme. (B) Distribution patterns of PHB synthesis pathway (PhaA, PhaB and PhaC) in red  
528 bar and degradation enzymes intracellular PhaZ (blue bar) and extracellular PhaZ (black bar)  
529 along the evolutionary tree. For FCB group and unclassified bacteria, almost no PHB  
530 metabolism exists. *Proteobacteria* are abundant in terms of PHB synthesis pathway and the  
531 two types of degradative enzymes while *Actinobacteria* have moderate level of synthesis  
532 ability and extracellular PhaZ. The intracellular PhaZ is largely missing in *Actinobacteria*. As

533 for *Firmicutes*, the PHB metabolism mainly distributes in the genus of *Bacillus* (red arrow).  
534 (C) Distribution patterns of key enzyme PPK1 (red bar), PPK2 (blue bar), and PPX (black  
535 bar) along the evolutionary pathway that is responsible for main synthesis and degradation  
536 pathways of polyphosphate in bacteria. Polyphosphate metabolism is widely distributed in  
537 bacteria. Unclassified bacteria and the class of *Mollicutes* (red arrow) belonging to phylum  
538 *Tenericutes* have apparent loss of polyphosphate metabolism in the tree, although data  
539 analysis showed 2215 bacterial species do not have PPK1, PPK2 and PPX. (D) Distribution  
540 patterns of two glycogen synthesis related pathways and two glycogen branching enzymes  
541 (GH13 GlgB and GH57 GlgB) along the evolutionary tree. GlgB is responsible for the highly  
542 branched structure of glycogen in bacteria. Full glycogen synthesis pathway includes GlgC,  
543 GlgA and GlgB (light violet bar), which distributes widely in bacteria. Trehalose-based  
544 glycogen synthesis pathway includes TreS, Pep2, GlgE, GlgB (dark violet bar) and is mainly  
545 concentrated in the *Actinobacteria* phylum. Distributions of the two GlgB enzymes show that  
546 GH57 GlgB (black bar) is mainly present in *Terrabacteria* group. In addition, GH57 GlgB is  
547 also identified in PVC group, *Spirochaetes*, *Acidobacteria*, *Fusobacteria*, *Thermotogae*,  
548 *Nitrospirae*, *Aquificae*, *Synergistetes*, *Elusimicrobia*, *Nitrospinae/Tectomicrobia* group,  
549 *Thermodesulfobacteria*, *Rhodothermaeota*, and *Dictyoglomi*. In contrast, GH13 GlgB is  
550 widely distributed in bacterial species.  
551
