# Supplementary material for: Systematic Analysis of Metabolic Pathway Distributions of Bacterial Energy Reserves
Source: bioRxiv preprint, doi:10.1101/545715, version 2 (2019-02-11)
Supplement: Supplementary Table S1 [file 545715_file03.xlsx]

## Sheet: Supplementary Table 1
ProteomeID	TaxonomyID	Organism	Protein Size	PPK1#	PPK2	PPX	GlgC	GlgA	GlgB*#	GlgB#	TreS	Pep2	GlgE	RV3032	PhaA	PhaB	PhaC Group 1	PhaC Group 2	FabG	PhaJ	FabD	SucD	4hbD	OrfZ	PDAT	WS/DGAT
UP000000212	1234679	Carnobacterium maltaromaticum LMA28	3539	0	0	0	2	0	0	0	0	0	0	4	1	3	3	0	0	0	1	3	3	0	0	0
UP000000214	1171373	Acidipropionibacterium acidipropionici ATCC 4875	3316	1	1	1	3	0	0	2	0	1	1	7	0	1	1	0	0	1	1	9	2	0	0	0
UP000000223	1224746	Gluconobacter oxydans H24	3696	1	1	1	2	1	0	1	0	0	0	4	0	11	6	0	2	0	1	7	1	0	0	0
UP000000224	1249480	Candidatus Sulfuricurvum sp. RIFRC-1	2353	1	1	2	5	2	0	1	0	0	0	1	0	1	0	0	0	0	1	1	0	0	0	0
UP000000225	382245	Aeromonas salmonicida subsp. salmonicida A449	4327	1	1	2	1	1	0	1	0	0	0	1	0	2	5	0	1	2	1	10	5	0	0	1
UP000000229	399739	Pseudomonas mendocina ymp	4563	1	2	1	2	1	0	1	0	0	1	3	7	7	11	0	1	3	1	14	3	0	0	0
UP000000230	399742	Enterobacter sp. 638	4236	1	1	2	2	0	0	1	1	0	0	3	1	7	6	0	1	0	2	8	4	0	0	0
UP000000231	312153	Polynucleobacter asymbioticus QLW-P1DMWA-1	2074	0	2	0	2	0	0	0	0	0	0	0	1	3	1	0	0	0	1	4	1	0	0	0
UP000000232	350054	Mycobacterium gilvum PYR-GCK	5499	1	2	0	4	1	1	1	2	1	2	10	6	27	16	0	8	6	7	19	0	0	0	2
UP000000233	379731	Pseudomonas stutzeri A1501	4092	1	1	1	2	1	0	1	1	0	1	2	4	10	6	1	0	3	2	9	1	0	0	0
UP000000234	349102	Rhodobacter sphaeroides ATCC 17025	4208	1	2	1	3	0	0	2	1	0	1	2	4	8	3	2	0	3	1	8	2	0	0	0
UP000000235	369723	Salinispora tropica CNB-440	4522	1	0	1	2	0	0	0	0	0	0	8	6	8	13	0	2	6	5	11	1	0	0	0
UP000000238	349521	Hahella chejuensis KCTC 2396	6751	1	0	1	5	0	0	0	0	0	0	14	4	11	9	2	2	3	7	9	2	0	0	1
UP000000239	290398	Chromohalobacter salexigens DSM 3043	3298	1	0	1	1	0	0	0	0	0	0	8	2	9	10	0	2	0	1	15	2	0	0	0
UP000000243	391295	Streptococcus suis 05ZYH33	2178	0	0	0	3	1	0	1	0	0	0	2	1	1	1	0	1	0	1	1	1	0	0	0
UP000000245	349163	Acidiphilium cryptum JF-5	3521	1	0	1	2	1	0	1	0	0	1	4	3	13	1	1	1	6	1	10	1	0	0	0
UP000000248	246195	Dichelobacter nodosus VCS1703A	1273	1	0	1	0	0	0	0	0	0	0	0	0	1	0	0	0	0	1	0	0	0	0	0
UP000000260	290339	Cronobacter sakazakii ATCC BAA-894	4421	1	0	2	2	1	0	1	1	0	0	2	1	5	3	0	0	0	1	9	3	0	0	0
UP000000265	272620	Klebsiella pneumoniae subsp. pneumoniae MGH 78578	5126	1	1	2	3	0	0	1	1	0	0	2	3	14	6	0	0	1	2	18	8	0	0	0
UP000000268	329726	Acaryochloris marina MBIC11017	8172	1	1	0	7	2	1	1	0	0	0	12	1	9	8	0	2	0	2	5	2	0	0	0
UP000000269	350688	Alkaliphilus oremlandii OhILAs	2828	0	0	0	1	0	0	0	0	0	0	0	3	1	2	0	0	2	1	2	4	0	0	0
UP000000270	438753	Azorhizobium caulinodans ORS 571	4708	1	1	1	3	0	0	1	0	0	0	4	4	18	15	2	0	5	1	12	4	0	0	0
UP000000272	555079	Thermosediminibacter oceani DSM 16646	2151	0	0	1	1	0	0	0	0	0	0	3	0	0	0	0	0	0	1	1	2	0	0	0
UP000000276	681645	Corynebacterium pseudotuberculosis C231	2090	0	2	2	3	0	0	1	0	0	1	4	0	0	2	0	0	1	0	4	1	0	0	0
UP000000291	1051632	Sulfobacillus acidophilus TPY	3722	0	0	0	3	0	0	0	0	0	0	7	5	5	2	0	0	3	1	6	0	1	0	0
UP000000310	762903	Pseudopedobacter saltans DSM 12145	3780	1	0	2	1	1	0	1	0	0	0	4	2	2	1	0	1	2	1	2	3	0	0	0
UP000000321	287752	Aurantimonas manganoxydans SI85-9A1	3625	1	1	1	1	1	0	1	0	0	1	4	2	14	5	1	1	2	1	7	1	0	0	0
UP000000322	446469	Sanguibacter keddieii DSM 10542	3710	1	1	1	2	0	0	1	2	1	1	4	1	5	7	0	0	2	1	3	1	0	0	0
UP000000323	525904	Thermobaculum terrenum ATCC BAA-798	2827	0	0	0	2	0	0	1	1	1	1	4	1	12	3	0	0	0	2	1	0	0	0	0
UP000000329	757424	Herbaspirillum seropedicae SmR1	4732	1	2	1	2	1	0	2	0	0	1	3	2	15	9	2	0	4	2	18	3	0	0	0
UP000000332	759914	Brachyspira pilosicoli 95/1000	2301	0	0	0	1	2	1	0	0	0	0	0	3	1	1	0	0	0	1	1	2	0	0	0
UP000000333	633147	Olsenella uli DSM 7084	1739	1	0	1	2	1	0	1	0	0	0	0	0	3	1	0	0	0	0	2	4	0	0	0
UP000000343	1198114	Granulicella tundricola MP5ACTX9	4514	1	1	0	4	0	1	0	0	0	1	4	2	6	8	0	6	3	1	6	0	0	0	0
UP000000361	318586	Paracoccus denitrificans PD1222	5019	1	3	1	1	0	0	1	0	0	0	0	6	21	7	2	0	5	1	25	2	0	0	0
UP000000362	203120	Leuconostoc mesenteroides subsp. mesenteroides ATCC 8293	2002	1	0	3	2	0	0	0	0	0	0	2	0	4	1	0	0	0	1	2	0	0	0	0
UP000000366	420662	Methylibium petroleiphilum PM1	4359	1	2	1	2	0	0	0	0	0	0	7	5	5	7	2	2	2	1	8	1	0	0	0
UP000000370	357809	Lachnoclostridium phytofermentans ISDg	3891	0	0	0	1	1	0	0	0	0	0	2	0	4	1	0	0	0	1	6	2	0	0	0
UP000000374	391735	Verminephrobacter eiseniae EF01-2	4911	1	2	1	5	0	0	0	0	0	0	0	5	27	4	1	2	7	4	23	5	0	0	0
UP000000376	644284	Arcanobacterium haemolyticum DSM 20595	1717	0	0	1	2	0	0	1	1	1	1	2	0	0	3	0	0	1	0	1	0	0	0	0
UP000000377	749414	Streptomyces bingchenggensis BCW-1	10019	1	1	2	8	0	0	1	3	1	1	6	9	31	13	0	4	5	24	30	1	0	0	0
UP000000378	643648	Syntrophothermus lipocalidus DSM 12680	2311	0	0	1	3	2	1	0	0	0	0	2	4	3	0	0	0	1	1	0	1	1	0	0
UP000000379	649638	Truepera radiovictrix DSM 17093	2924	1	1	0	2	0	0	0	0	0	1	6	2	14	7	0	0	0	1	5	2	0	0	0
UP000000383	666681	Methylotenera versatilis 301	2752	1	1	1	4	1	0	1	0	0	0	3	0	4	3	0	2	1	1	6	0	0	0	0
UP000000387	762948	Rothia dentocariosa ATCC 17931	2212	1	1	2	2	0	0	0	0	0	0	2	0	3	4	0	0	2	2	4	0	0	0	0
UP000000417	292459	Symbiobacterium thermophilum IAM 14863	3313	0	0	0	4	0	0	0	0	0	0	6	4	5	1	0	0	0	1	2	2	0	0	0
UP000000422	273121	Wolinella succinogenes DSM 1740	2028	1	1	2	0	0	0	0	0	0	0	5	0	1	0	0	0	0	1	0	1	0	0	0
UP000000423	273119	Ureaplasma parvum serovar 3 str. ATCC 700970	611	0	0	0	0	0	0	0	0	0	0	0	0	0	1	0	0	0	0	1	0	0	0	0
UP000000425	122586	Neisseria meningitidis MC58	2001	1	0	1	1	0	0	0	0	0	0	1	0	1	1	0	0	0	1	4	0	0	0	0
UP000000428	227882	Streptomyces avermitilis MA-4680 = NBRC 14893	7672	1	1	2	6	0	0	2	4	2	2	7	8	15	13	0	4	5	5	21	1	0	0	1
UP000000429	85962	Helicobacter pylori 26695	1553	1	0	1	1	0	0	0	0	0	0	0	1	1	0	0	0	0	1	1	0	0	0	0
UP000000430	62977	Acinetobacter sp. ADP1	3263	2	0	1	2	0	0	0	0	0	0	5	4	8	5	0	1	1	2	13	2	0	0	1
UP000000431	272561	Chlamydia trachomatis D/UW-3/CX	895	0	0	0	0	1	0	1	0	0	0	0	0	0	0	0	1	0	1	0	0	0	0	0
UP000000432	220668	Lactobacillus plantarum WCFS1	3087	1	0	3	2	1	0	1	0	0	0	4	0	7	3	0	1	0	1	2	0	0	0	0
UP000000434	269800	Thermobifida fusca YX	3085	1	0	1	3	0	0	1	1	1	1	7	6	10	2	0	0	4	2	8	2	0	0	0
UP000000435	269484	Ehrlichia canis str. Jake	921	0	0	0	0	0	0	0	0	0	0	0	0	1	0	0	0	0	1	1	0	0	0	0
UP000000439	206672	Bifidobacterium longum NCC2705	1725	1	1	1	2	0	0	1	0	0	1	1	0	0	1	0	0	0	0	3	0	0	0	0
UP000000440	197221	Thermosynechococcus elongatus BP-1	2451	1	0	0	4	1	1	1	0	0	0	4	0	2	7	0	0	0	1	3	1	0	0	0
UP000000442	177437	Desulfobacterium autotrophicum HRM2	4846	0	0	0	4	2	0	1	0	0	0	4	2	5	3	0	3	2	1	4	2	5	0	0
UP000000444	396513	Staphylococcus carnosus subsp. carnosus TM300	2460	1	0	1	2	0	0	0	0	0	0	2	3	5	2	0	0	0	1	7	0	0	0	0
UP000000447	309801	Thermomicrobium roseum DSM 5159	2858	0	0	0	3	1	0	1	0	0	1	8	1	8	5	0	0	0	2	1	1	0	0	0
UP000000448	598659	Nautilia profundicola AmH	1730	0	3	2	1	0	0	0	0	0	0	1	0	2	0	0	0	0	1	1	0	0	0	0
UP000000449	218495	Streptococcus uberis 0140J	1760	1	0	1	3	1	0	1	0	0	0	1	1	5	0	0	0	0	1	3	0	0	0	0
UP000000466	1117647	Simiduia agarivorans SA1 = DSM 21679	3812	1	0	1	1	0	0	0	0	0	0	3	4	10	2	1	1	1	1	9	0	1	0	0
UP000000467	1089553	Thermacetogenium phaeum DSM 12270	2803	0	0	1	2	2	1	0	0	0	0	7	0	0	0	0	0	0	1	1	5	0	0	0
UP000000482	1131462	Dehalobacter sp. CF	2936	0	0	0	5	0	0	0	0	0	0	1	0	1	0	0	0	0	1	1	0	0	0	0
UP000000483	880072	Desulfobacca acetoxidans DSM 11109	2859	0	0	0	4	2	0	1	0	0	1	7	0	0	0	0	0	0	1	2	0	0	0	0
UP000000485	593907	Cellulomonas gilvus ATCC 13127	3153	1	2	1	0	0	0	1	3	1	2	2	1	2	4	0	0	2	1	5	0	0	0	0
UP000000491	579138	Zymomonas mobilis subsp. pomaceae ATCC 29192	1740	1	1	1	2	0	0	0	0	0	0	1	0	4	0	0	2	0	1	3	3	0	0	0
UP000000492	662755	Corynebacterium resistens DSM 45100	2160	0	2	0	3	0	0	1	0	0	1	3	2	0	1	0	2	2	0	5	0	0	0	0
UP000000493	761193	Runella slithyformis DSM 19594	5750	1	0	1	2	0	0	2	1	1	1	6	2	14	8	0	0	2	1	6	2	1	0	0
UP000000494	717785	Hyphomicrobium sp. MC1	4889	1	3	1	2	0	0	0	0	0	0	4	2	11	7	2	4	3	1	13	0	0	0	0
UP000000495	765952	Parachlamydia acanthamoebae UV-7	2784	0	0	0	2	1	0	1	0	0	0	0	0	3	3	0	4	0	1	4	0	0	0	0
UP000000496	331113	Simkania negevensis Z	2516	0	0	1	2	1	0	1	0	0	0	2	0	1	2	0	2	0	1	3	0	0	0	0
UP000000501	261292	Nitrosomonas sp. Is79A3	3273	1	1	1	2	1	0	1	0	0	0	1	2	1	3	0	0	0	1	1	0	0	0	0
UP000000503	744872	Treponema caldarium DSM 7334	2754	1	0	1	3	1	1	0	1	0	0	5	0	2	0	0	1	0	1	1	3	0	0	0
UP000000504	903503	Candidatus Moranella endobia PCIT	405	0	0	0	0	0	0	0	0	0	0	0	0	1	0	0	0	0	1	0	0	0	0	0
UP000000517	59374	Fibrobacter succinogenes subsp. succinogenes S85	2871	0	0	1	2	0	1	1	0	1	1	3	0	1	1	0	0	0	1	1	3	0	0	0
UP000000528	272635	Mycoplasma pulmonis UAB CTIP	778	0	0	0	0	0	0	0	1	0	0	0	0	0	3	0	0	0	0	0	0	0	0	0
UP000000529	264201	Candidatus Protochlamydia amoebophila UWE25	1879	0	0	0	1	1	0	1	0	0	0	0	0	0	1	0	1	0	1	1	0	0	0	0
UP000000531	176279	Staphylococcus epidermidis RP62A	2492	1	0	1	1	0	0	0	1	0	0	1	2	5	2	0	0	1	1	6	1	0	0	0
UP000000532	300852	Thermus thermophilus HB8	2227	0	0	0	2	1	1	0	0	0	0	5	2	3	0	0	0	1	1	2	0	1	0	0
UP000000533	302409	Ehrlichia ruminantium str. Gardel	948	0	0	0	0	0	0	0	0	0	0	0	0	1	0	0	0	0	1	1	0	0	0	0
UP000000534	292805	Wolbachia endosymbiont strain TRS of Brugia malayi	805	0	0	0	0	0	0	0	0	0	0	0	0	1	0	0	1	0	1	0	0	0	0	0
UP000000535	242231	Neisseria gonorrhoeae FA 1090	2106	1	1	1	2	0	0	0	0	0	0	3	0	1	1	0	0	0	1	3	0	0	0	0
UP000000537	312309	Vibrio fischeri ES114	3813	0	0	1	4	1	0	1	0	0	0	3	0	1	4	0	0	1	1	4	1	0	0	0
UP000000543	279808	Staphylococcus haemolyticus JCSC1435	2640	1	0	1	1	0	0	0	1	0	0	1	2	4	1	0	0	1	1	6	0	0	0	0
UP000000545	306537	Corynebacterium jeikeium K411	2064	0	2	0	2	0	0	1	0	0	1	4	2	1	1	0	1	2	0	2	0	0	0	0
UP000000546	259536	Psychrobacter arcticus 273-4	2099	1	2	1	2	0	0	0	0	0	0	2	2	3	1	0	1	1	1	4	1	0	0	1
UP000000547	167879	Colwellia psychrerythraea 34H	4872	0	0	1	1	0	0	0	0	0	0	4	2	5	4	1	1	4	1	18	1	1	0	0
UP000000548	262719	Mycoplasma hyopneumoniae J	671	0	0	0	0	0	0	0	0	0	0	0	0	0	1	0	0	0	0	1	0	0	0	0
UP000000549	262723	Mycoplasma synoviae 53	679	0	0	0	0	0	0	0	0	0	0	0	0	0	1	0	0	1	0	1	0	1	0	0
UP000000550	159087	Dechloromonas aromatica RCB	4155	1	1	1	4	1	1	1	0	0	0	6	4	6	12	3	1	4	2	3	1	1	0	0
UP000000552	266835	Mesorhizobium japonicum MAFF 303099	7255	1	2	1	2	1	0	1	0	0	0	3	2	31	14	1	5	6	2	22	0	0	0	0
UP000000555	273068	Caldanaerobacter subterraneus subsp. tengcongensis MB4	2545	0	0	1	3	0	0	0	0	1	0	4	1	1	0	0	0	1	1	1	1	1	0	0
UP000000556	160488	Pseudomonas putida KT2440	5527	1	1	1	2	1	0	1	0	0	1	4	4	8	13	2	2	4	1	27	4	0	0	0
UP000000557	251221	Gloeobacter violaceus PCC 7421	4406	1	0	0	12	0	1	1	0	0	0	9	0	4	8	0	3	0	3	3	2	0	0	0
UP000000558	83334	Escherichia coli O157:H7	5335	1	0	2	2	0	0	1	0	0	0	1	1	5	7	0	0	0	1	10	5	0	0	0
UP000000562	36870	Wigglesworthia glossinidia endosymbiont of Glossina brevipalpis	617	0	0	0	0	0	0	0	0	0	0	0	0	1	1	0	0	0	1	1	0	0	0	0
UP000000565	290402	Clostridium beijerinckii NCIMB 8052	5003	1	0	1	4	1	0	1	0	0	0	2	2	4	2	0	0	3	2	9	8	1	0	0
UP000000566	435591	Parabacteroides distasonis ATCC 8503	3830	1	0	0	2	1	0	1	0	0	0	5	0	1	0	0	0	0	1	1	2	0	0	0
UP000000576	190486	Xanthomonas citri pv. citri str. 306	4354	1	1	1	2	1	0	2	0	0	1	6	1	7	5	0	2	0	2	10	0	0	0	0
UP000000577	243231	Geobacter sulfurreducens PCA	3402	1	0	1	4	2	0	0	0	0	0	5	0	2	1	0	0	1	1	4	0	0	0	0
UP000000579	71421	Haemophilus influenzae Rd KW20	1707	0	0	1	1	1	0	1	0	0	0	1	1	1	3	0	0	0	1	1	0	0	0	0
UP000000580	262316	Mycobacterium avium subsp. paratuberculosis K-10	4316	1	1	0	3	1	1	1	1	1	1	8	10	22	17	0	9	6	5	16	0	0	0	1
UP000000581	257314	Lactobacillus johnsonii NCC 533	1809	0	0	0	2	0	0	0	0	0	0	4	1	0	1	0	0	0	0	1	0	0	0	0
UP000000582	196627	Corynebacterium glutamicum ATCC 13032	3093	0	2	1	2	0	0	1	1	1	1	4	0	3	2	0	0	1	0	6	2	0	0	0
UP000000583	83558	Chlamydia pneumoniae	1109	0	0	0	0	1	0	1	0	0	0	0	0	0	0	0	1	0	1	0	0	0	0	0
UP000000584	243277	Vibrio cholerae O1 biovar El Tor str. N16961	3783	1	1	2	1	1	0	1	0	0	0	2	0	3	7	1	0	1	1	4	3	0	0	0
UP000000586	171101	Streptococcus pneumoniae R6	2030	0	0	0	2	1	0	1	0	0	0	2	0	1	0	0	0	0	1	2	2	0	0	0
UP000000588	242619	Porphyromonas gingivalis W83	1863	1	0	0	1	1	0	1	0	0	0	3	0	0	0	0	0	0	1	0	2	2	0	0
UP000000593	298386	Photobacterium profundum SS9	5328	1	1	2	1	1	0	1	0	0	0	2	0	2	7	2	0	1	3	9	4	0	0	1
UP000000594	1392	Bacillus anthracis	5493	1	1	1	3	1	0	1	0	0	0	3	4	7	6	0	0	2	1	8	1	0	0	0
UP000000601	224915	Buchnera aphidicola str. Bp (Baizongia pistaciae)	507	0	0	0	1	0	0	0	0	0	0	0	0	0	1	0	0	0	1	0	0	0	0	0
UP000000602	177439	Desulfotalea psychrophila LSv54	3233	1	2	0	5	0	0	0	0	0	0	2	0	2	1	0	0	0	1	0	6	1	0	0
UP000000603	267747	Cutibacterium acnes KPA171202	2294	1	1	1	2	0	0	1	2	1	1	6	0	2	3	0	0	1	1	4	1	0	0	0
UP000000605	272560	Burkholderia pseudomallei K96243	5717	1	2	1	6	0	0	1	0	0	0	4	8	18	7	2	0	5	9	27	1	0	0	0
UP000000606	279010	Bacillus licheniformis DSM 13 = ATCC 14580	4164	0	0	0	1	1	0	1	0	0	0	5	2	12	1	0	1	0	1	10	5	0	0	0
UP000000607	221988	Mannheimia succiniciproducens MBEL55E	2367	0	0	1	1	1	0	1	0	0	0	0	0	1	2	0	0	0	1	4	0	0	0	0
UP000000609	272624	Legionella pneumophila subsp. pneumophila str. Philadelphia 1	2930	1	0	0	2	0	0	0	0	0	0	0	2	3	5	3	1	1	1	8	1	0	0	0
UP000000625	83333	Escherichia coli K-12	4313	1	0	2	3	0	0	1	1	0	0	1	2	5	4	0	0	1	1	11	5	0	0	0
UP000000628	471856	Jonesia denitrificans DSM 20603	2495	1	0	1	1	0	0	1	1	0	1	3	1	2	3	0	0	1	1	3	0	0	0	0
UP000000636	292414	Ruegeria sp. TM1040	3849	0	2	1	2	0	0	0	0	0	0	0	6	7	2	1	0	2	2	17	1	0	0	0
UP000000637	290340	Paenarthrobacter aurescens TC1	4565	1	2	2	4	0	0	1	1	0	1	3	3	11	5	0	0	5	2	27	1	0	0	0
UP000000638	189918	Mycobacterium sp. KMS	5893	1	2	0	3	1	1	1	2	1	2	7	10	25	16	0	9	9	7	20	1	0	0	3
UP000000639	357804	Psychromonas ingrahamii 37	3530	1	0	2	2	2	0	1	0	0	1	1	1	1	3	0	1	1	3	6	3	0	0	0
UP000000640	196162	Nocardioides sp. JS614	4888	1	2	2	1	0	0	1	1	1	1	6	7	18	9	0	2	9	1	24	0	0	0	2
UP000000643	360095	Bartonella bacilliformis KC583	1255	0	0	0	1	0	0	0	0	0	0	0	0	2	0	0	0	1	1	1	0	0	0	0
UP000000644	365044	Polaromonas naphthalenivorans CJ2	4879	1	4	1	3	1	0	1	0	0	0	2	6	14	4	1	0	5	2	12	2	1	0	0
UP000000645	232721	Acidovorax sp. JS42	4045	1	4	1	2	0	0	0	0	0	0	2	7	11	3	0	3	2	1	7	1	1	0	0
UP000000647	349124	Halorhodospira halophila SL1	2406	1	0	0	0	1	0	1	0	0	0	4	1	2	2	2	3	1	1	3	0	0	0	0
UP000000654	316055	Rhodopseudomonas palustris BisA53	4851	1	1	1	1	1	0	1	0	0	1	5	6	17	9	2	2	5	1	6	1	0	0	0
UP000000657	326424	Frankia alni ACN14a	6710	1	2	1	6	0	0	1	2	1	1	12	8	23	10	0	6	8	9	13	2	0	0	0
UP000000658	384676	Pseudomonas entomophila L48	5126	1	2	1	4	1	0	1	0	0	1	2	3	11	10	1	2	3	2	18	1	0	0	0
UP000000669	372461	Buchnera aphidicola BCc	362	0	0	0	0	0	0	0	0	0	0	0	0	0	0	0	0	0	0	0	0	0	0	0
UP000000671	234267	Candidatus Solibacter usitatus Ellin6076	7761	1	2	1	4	1	0	1	0	0	0	9	3	11	6	0	2	1	2	8	1	1	0	0
UP000000683	715451	Alteromonas naphthalenivorans	4342	1	1	2	1	1	0	2	0	0	0	3	2	7	8	0	4	2	1	9	2	1	0	0
UP000000684	318167	Shewanella frigidimarina NCIMB 400	3990	0	0	1	4	0	0	1	0	0	0	1	2	8	9	0	0	2	1	13	3	1	0	0
UP000000686	743720	Pseudomonas fulva 12-X	4459	1	0	1	2	1	0	1	0	1	1	1	2	6	9	1	1	2	2	22	1	0	0	0
UP000000716	360911	Exiguobacterium sp. AT1b	3020	1	1	1	3	1	1	0	1	0	1	3	1	7	3	0	0	0	1	5	3	0	0	0
UP000000718	289376	Thermodesulfovibrio yellowstonii DSM 11347	1982	0	0	1	3	0	0	1	0	0	0	3	0	0	0	0	0	0	1	0	1	0	0	0
UP000000719	373903	Halothermothrix orenii H 168	2324	0	0	1	3	2	1	1	0	1	0	2	0	0	0	0	0	0	1	2	0	1	0	0
UP000000720	390235	Pseudomonas putida W619	5179	1	2	1	2	1	0	1	0	0	1	3	4	7	17	2	2	2	2	20	1	0	0	0
UP000000723	511995	Candidatus Azobacteroides pseudotrichonymphae genomovar. CFP2	847	0	0	0	1	1	0	0	0	0	0	0	0	1	0	0	0	0	1	0	1	0	0	0
UP000000737	313612	Lyngbya sp. PCC 8106	6110	1	0	0	5	1	1	2	0	0	0	10	0	4	10	0	1	0	1	7	1	0	0	0
UP000000738	465515	Micrococcus luteus NCTC 2665	2207	0	3	2	1	0	0	1	0	0	1	4	2	0	6	0	0	3	1	8	0	0	0	0
UP000000739	439235	Desulfatibacillum alkenivorans AK-01	5198	0	0	0	2	1	0	1	0	0	0	7	6	8	5	0	1	7	2	4	6	3	0	0
UP000000742	491915	Anoxybacillus flavithermus WK1	2819	1	0	1	2	1	0	1	0	0	1	1	3	2	1	0	0	0	1	5	3	0	0	0
UP000000750	301447	Streptococcus pyogenes serotype M1	1690	0	0	0	2	0	0	0	0	0	0	1	3	2	0	0	0	0	1	2	1	0	0	0
UP000000753	225849	Shewanella piezotolerans WP3	4898	0	0	1	1	0	0	1	0	0	0	1	1	2	5	0	2	2	1	9	3	1	0	0
UP000000754	290399	Arthrobacter sp. FB24	4453	1	1	1	2	0	0	0	3	0	1	3	4	10	5	0	0	5	1	24	1	0	0	0
UP000000755	411154	Gramella forsetii KT0803	3554	2	0	2	2	0	0	1	0	0	0	5	2	5	5	0	1	1	1	6	0	1	0	0
UP000000756	380703	Aeromonas hydrophila subsp. hydrophila ATCC 7966	4121	1	1	2	3	1	0	1	0	0	0	2	1	4	7	0	1	2	1	10	6	0	0	1
UP000000757	246196	Mycobacterium smegmatis str. MC2 155	6602	1	2	0	3	0	1	1	2	1	2	8	8	34	22	0	4	7	5	31	2	0	0	3
UP000000760	360106	Campylobacter fetus subsp. fetus 82-40	1715	1	1	2	1	0	0	0	0	0	0	3	0	2	0	0	1	0	1	3	2	0	0	0
UP000000771	525909	Acidimicrobium ferrooxidans DSM 10331	1935	1	1	0	4	0	0	0	1	0	0	5	4	1	2	0	0	2	1	5	0	0	0	0
UP000000773	278197	Pediococcus pentosaceus ATCC 25745	1755	0	0	1	1	0	0	0	0	0	0	1	0	4	1	0	0	0	1	1	0	0	0	0
UP000000774	203123	Oenococcus oeni PSU-1	1682	1	0	1	1	0	0	0	1	0	0	2	1	3	2	0	0	0	1	4	0	0	0	0
UP000000781	444179	Candidatus Sulcia muelleri GWSS	227	0	0	0	0	0	0	0	0	0	0	0	0	0	0	0	0	0	0	0	0	0	0	0
UP000000784	398578	Delftia acidovorans SPH-1	5968	1	2	2	2	0	0	0	0	0	0	1	7	19	5	1	2	3	3	15	2	0	0	0
UP000000787	316274	Herpetosiphon aurantiacus DSM 785	5254	1	1	1	6	3	1	0	1	0	0	21	3	8	10	0	1	1	6	4	0	1	0	0
UP000000788	93059	Prochlorococcus marinus str. MIT 9211	1855	1	0	1	4	1	1	1	0	0	0	3	0	3	2	0	0	0	1	1	0	0	0	0
UP000000789	403833	Petrotoga mobilis SJ95	1890	1	0	1	3	1	1	1	1	0	0	2	0	1	1	0	0	1	1	2	2	0	0	0
UP000000790	405566	Lactobacillus helveticus DPC 4571	1580	0	0	0	1	0	0	0	0	0	0	2	1	1	2	0	0	0	1	1	0	0	0	0
UP000000798	224324	Aquifex aeolicus VF5	1553	0	0	1	2	1	1	1	0	0	0	4	0	1	0	0	0	0	1	2	0	0	0	0
UP000000799	192222	Campylobacter jejuni subsp. jejuni NCTC 11168 = ATCC 700819	1623	1	1	1	2	0	0	0	0	0	0	1	0	2	0	0	0	0	1	2	0	0	0	0
UP000000806	272631	Mycobacterium leprae TN	1603	1	0	0	2	1	1	0	0	0	0	3	2	1	4	0	0	2	6	3	0	0	0	0
UP000000807	243273	Mycoplasma genitalium G37	483	0	0	0	0	0	0	0	0	0	0	0	0	0	1	0	0	0	0	0	0	0	0	0
UP000000808	272634	Mycoplasma pneumoniae M129	687	0	0	0	0	0	0	0	0	0	0	0	0	0	1	0	0	0	0	0	0	0	0	0
UP000000809	272843	Pasteurella multocida subsp. multocida str. Pm70	2015	0	0	1	1	1	0	1	0	0	0	0	0	2	2	0	0	0	1	5	1	0	0	0
UP000000811	243276	Treponema pallidum subsp. pallidum str. Nichols	1027	0	0	0	0	0	1	0	0	0	0	0	0	0	0	0	0	0	0	0	0	0	0	0
UP000000812	160492	Xylella fastidiosa 9a5c	2772	1	0	1	2	0	0	0	0	0	0	4	0	2	3	0	1	0	1	0	0	0	0	0
UP000000813	176299	Agrobacterium fabrum str. C58	5344	1	1	1	2	2	0	1	0	0	0	3	3	15	7	1	2	2	3	18	4	0	0	0
UP000000814	272562	Clostridium acetobutylicum ATCC 824	3847	1	0	1	4	2	1	0	0	0	0	5	2	3	1	0	0	0	2	2	4	0	0	0
UP000000815	632	Yersinia pestis	3909	1	0	2	4	1	0	1	0	0	0	0	0	2	5	0	1	1	3	6	2	1	0	0
UP000000817	169963	Listeria monocytogenes EGD-e	2844	0	0	0	2	0	0	0	1	0	0	1	1	3	1	0	0	0	1	5	4	0	0	0
UP000000818	195102	Clostridium perfringens str. 13	2721	0	0	1	3	1	0	2	0	0	0	1	1	1	0	0	0	0	1	2	4	0	0	0
UP000000821	208435	Streptococcus agalactiae 2603V/R	2105	0	0	0	2	1	0	1	0	0	0	2	1	2	0	0	0	0	1	3	2	0	0	0
UP000000822	221109	Oceanobacillus iheyensis HTE831	3490	0	0	0	4	1	0	1	0	0	0	2	6	12	2	0	2	2	1	13	2	1	0	0
UP000000841	471857	Saccharomonospora viridis DSM 43017	3828	1	0	1	3	1	1	0	0	0	0	5	4	7	3	0	1	2	2	11	0	0	0	1
UP000000844	446470	Stackebrandtia nassauensis DSM 44728	6379	1	0	1	1	1	0	0	3	0	0	2	4	20	18	0	2	3	6	9	1	0	0	0
UP000000845	526218	Sebaldella termitidis ATCC 33386	4124	1	1	1	2	1	1	0	1	0	0	2	0	7	0	0	0	1	1	3	8	0	0	0
UP000000849	446466	Cellulomonas flavigena DSM 20109	3673	1	1	1	3	0	0	1	2	1	2	9	2	6	6	0	1	3	1	4	1	0	0	0
UP000000851	479433	Catenulispora acidiphila DSM 44928	8909	1	2	2	3	2	0	2	5	0	0	8	4	22	20	0	5	7	5	22	0	0	0	0
UP000000852	485917	Pedobacter heparinus DSM 2366	4249	2	0	2	1	1	0	1	0	0	0	3	2	9	2	0	0	2	3	5	1	0	0	0
UP000000925	583355	Coraliomargarita akajimensis DSM 45221	3110	1	2	1	1	0	0	1	0	0	0	3	0	7	2	0	1	2	1	3	0	0	0	0
UP000000927	264731	Prevotella ruminicola 23	2761	0	0	0	4	1	0	0	0	0	0	4	0	1	1	0	0	1	1	0	0	0	0	0
UP000000930	1236608	Moraxella catarrhalis BBH18	1881	1	1	2	2	0	0	0	0	0	0	1	0	3	1	0	1	1	1	3	0	0	0	1
UP000000935	545693	Bacillus megaterium QM B1551	5606	1	0	1	2	2	0	1	0	0	0	5	4	13	8	0	1	1	3	19	6	1	0	0
UP000000936	754252	Propionibacterium freudenreichii subsp. shermanii CIRM-BIA1	2310	1	1	1	2	0	0	1	1	1	1	4	1	0	1	0	1	2	1	6	1	0	0	0
UP000000939	572480	Arcobacter nitrofigilis DSM 7299	3125	0	2	2	3	0	0	0	0	0	0	2	0	1	0	0	0	0	4	6	3	0	0	0
UP000000948	634452	Acetobacter pasteurianus IFO 3283-01	2906	1	1	1	3	1	0	1	0	0	0	3	0	4	0	0	2	0	1	14	2	0	0	0
UP000000954	469378	Cryptobacterium curtum DSM 15641	1355	1	1	1	2	0	0	0	0	0	0	0	0	0	0	0	0	0	1	1	1	0	0	0
UP000000960	521095	Atopobium parvulum DSM 20469	1353	0	0	1	2	1	0	1	0	0	0	0	0	0	0	0	0	0	0	1	2	0	0	0
UP000000998	351348	Marinobacter hydrocarbonoclasticus VT8	4170	1	1	1	2	1	0	1	0	0	0	6	5	4	4	1	1	2	1	7	0	0	0	3
UP000001006	623	Shigella flexneri	4103	1	0	2	3	0	0	1	0	0	0	0	1	6	3	0	0	0	1	6	3	0	0	0
UP000001007	194439	Chlorobaculum tepidum TLS	2250	2	0	1	4	1	0	0	0	0	1	3	0	2	5	0	2	0	1	2	1	1	0	0
UP000001010	190485	Xanthomonas campestris pv. campestris str. ATCC 33913	4127	1	1	1	3	1	0	2	0	0	1	3	1	8	8	0	2	0	2	9	0	0	0	0
UP000001014	99287	Salmonella enterica subsp. enterica serovar Typhimurium str. LT2	4533	1	0	2	3	1	0	1	0	0	0	0	1	3	5	0	0	1	1	11	7	1	0	0
UP000001016	272632	Mycoplasma mycoides subsp. mycoides SC str. PG1	978	0	0	0	0	0	0	0	0	0	0	0	0	1	1	0	0	0	0	1	0	0	0	0
UP000001022	233412	Haemophilus ducreyi 35000HP	1694	0	0	1	2	0	0	0	0	0	0	0	0	1	2	0	0	0	1	0	0	0	0	0
UP000001023	246200	Ruegeria pomeroyi DSS-3	4269	0	3	1	1	0	0	0	0	0	0	2	6	10	4	2	1	5	2	19	1	0	0	0
UP000001025	243090	Rhodopirellula baltica SH 1	7271	1	2	1	1	0	0	2	0	0	0	9	0	11	6	0	1	1	2	10	1	0	0	0
UP000001026	59919	Prochlorococcus marinus subsp. pastoris str. CCMP1986	1942	1	0	0	4	1	1	1	0	0	0	2	0	3	1	0	1	0	1	1	1	0	0	0
UP000001029	445932	Elusimicrobium minutum Pei191	1528	0	0	0	2	1	1	0	0	0	0	3	0	0	0	0	0	0	0	1	1	0	0	0
UP000001031	349741	Akkermansia muciniphila ATCC BAA-835	2137	1	1	0	2	0	0	1	0	0	0	4	0	2	0	0	0	0	1	1	2	0	0	0
UP000001035	216591	Burkholderia cenocepacia J2315	6993	1	2	1	3	0	0	0	0	0	0	8	8	26	15	2	2	4	3	33	4	0	0	0
UP000001036	498211	Cellvibrio japonicus Ueda107	3711	1	1	1	2	1	0	1	0	1	0	5	0	6	2	0	1	1	2	1	1	0	0	0
UP000001052	485915	Desulfohalobium retbaense DSM 5692	2500	0	0	0	1	1	0	1	0	0	1	8	0	1	1	0	0	0	1	3	2	0	0	0
UP000001054	394	Sinorhizobium fredii NGR234	6274	1	3	1	2	2	0	1	0	0	0	5	4	19	9	1	2	4	2	27	2	0	0	0
UP000001060	661367	Legionella longbeachae NSW150	3460	1	0	0	2	0	0	0	0	0	0	0	2	6	4	2	1	2	3	8	1	1	0	0
UP000001062	717774	Marinomonas mediterranea MMB-1	4118	1	1	1	1	1	0	1	0	0	0	1	2	6	3	0	0	1	2	19	0	0	0	0
UP000001096	883078	Afipia broomeae ATCC 49717	4994	1	0	1	1	0	0	0	0	0	0	7	6	17	11	2	1	9	1	12	3	0	0	0
UP000001110	391009	Thermosipho melanesiensis BI429	1877	0	0	0	5	1	1	0	1	0	0	1	0	0	0	0	0	1	1	2	4	0	0	0
UP000001113	400668	Marinomonas sp. MWYL1	4416	1	0	1	1	1	0	1	0	0	0	1	3	6	1	0	1	3	1	29	1	0	0	0
UP000001114	339671	Actinobacillus succinogenes 130Z	2077	0	0	1	2	1	0	1	0	0	0	2	0	3	3	0	0	0	1	2	1	0	0	0
UP000001115	316278	Synechococcus sp. RCC307	2528	1	1	0	3	1	1	1	1	0	0	2	0	4	3	0	1	0	1	2	2	0	0	0
UP000001116	266940	Kineococcus radiotolerans SRS30216 = ATCC BAA-149	4674	1	2	2	2	0	0	1	3	1	1	9	1	10	12	0	3	1	1	7	0	0	0	0
UP000001118	387092	Nitratiruptor sp. SB155-2	1843	1	1	2	1	1	0	1	0	0	0	3	0	2	0	0	0	0	1	1	0	0	0	0
UP000001120	326423	Bacillus velezensis FZB42	3693	0	0	0	4	0	0	0	0	0	0	3	3	20	2	0	0	1	7	8	5	0	0	0
UP000001131	467705	Streptococcus gordonii str. Challis substr. CH1	2050	0	0	0	2	1	0	1	0	0	0	1	0	1	1	0	1	0	1	1	1	0	0	0
UP000001136	367737	Arcobacter butzleri RM4018	2254	0	3	2	2	0	0	0	0	0	0	2	0	1	1	0	0	1	1	1	1	0	0	0
UP000001168	66692	Bacillus clausii KSM-K16	4082	0	0	0	2	0	0	0	0	0	0	3	4	13	6	0	0	0	1	7	6	0	0	0
UP000001170	264199	Streptococcus thermophilus LMG 18311	1577	0	0	0	2	0	0	0	0	0	0	2	0	0	0	0	0	0	1	1	0	0	0	0
UP000001171	283942	Idiomarina loihiensis L2TR	2608	1	0	2	4	0	0	0	0	0	0	1	1	2	4	0	1	1	1	7	2	1	0	0
UP000001172	235909	Geobacillus kaustophilus HTA426	3516	0	0	0	3	0	0	0	0	0	0	4	5	9	1	0	0	2	1	6	4	0	0	0
UP000001173	264203	Zymomonas mobilis subsp. mobilis ZM4 = ATCC 31821	1779	1	1	1	1	0	0	0	0	0	0	1	0	6	0	0	1	0	1	2	2	0	0	0
UP000001174	177416	Francisella tularensis subsp. tularensis SCHU S4	1528	0	1	1	2	1	0	1	0	0	0	1	1	1	0	0	0	0	1	2	0	0	0	0
UP000001176	272568	Gluconacetobacter diazotrophicus PA1 5	3783	1	0	1	3	1	0	1	0	0	0	7	1	13	4	0	3	0	1	8	0	0	0	0
UP000001185	426117	Methylobacterium sp. 4-46	6647	1	3	1	5	1	0	1	1	0	0	7	3	16	6	3	0	6	1	10	6	0	0	0
UP000001190	216594	Mycobacterium marinum M	5418	1	1	0	4	1	1	1	2	1	2	5	8	14	22	0	5	7	8	14	0	1	0	10
UP000001191	63737	Nostoc punctiforme PCC 73102	6573	1	1	0	5	1	1	1	0	0	0	12	0	9	8	0	5	0	14	5	1	0	0	0
UP000001192	391038	Paraburkholderia phymatum STM815	7461	1	6	1	4	2	0	1	1	0	0	12	9	24	12	2	1	7	3	39	1	0	0	0
UP000001195	935198	Clostridium botulinum B str. Eklund 17B (NRP)	3473	0	0	1	5	1	0	1	0	0	0	1	1	1	1	0	0	0	1	4	8	1	0	0
UP000001201	436114	Sulfurihydrogenibium sp. YO3AOP1	1712	0	0	1	3	1	1	0	0	0	0	7	0	2	0	0	0	0	1	2	1	0	0	0
UP000001203	43989	Cyanothece sp. ATCC 51142	5239	2	0	0	5	3	1	3	0	0	0	4	0	4	8	0	1	0	6	6	1	0	0	0
UP000001205	314724	Borrelia turicatae 91E135	1024	0	0	0	0	0	0	0	0	0	0	1	1	0	0	0	0	0	0	0	0	0	0	0
UP000001208	517418	Chloroherpeton thalassium ATCC 35110	2708	2	1	1	5	1	0	0	0	0	0	4	0	4	4	0	1	0	1	1	1	1	0	0
UP000001213	521096	Tsukamurella paurometabola DSM 20162	4170	1	2	1	4	1	1	1	1	0	1	7	6	8	10	1	2	7	4	13	1	0	0	0
UP000001219	526226	Gordonia bronchialis DSM 43247	4628	1	3	0	3	1	1	1	0	0	1	8	4	9	7	0	2	6	4	10	1	0	0	2
UP000001225	340100	Bordetella petrii DSM 12804	4912	1	0	1	1	1	0	1	0	0	0	11	8	23	6	0	0	12	1	14	4	0	0	0
UP000001227	452471	Candidatus Amoebophilus asiaticus 5a2	1253	0	0	1	1	0	0	0	0	0	0	0	0	1	0	0	0	0	1	0	0	0	0	0
UP000001228	331678	Chlorobium phaeobacteroides BS1	2434	1	0	1	6	1	0	0	0	0	1	4	0	3	5	0	3	0	1	2	0	1	0	0
UP000001231	523791	Kangiella koreensis DSM 16069	2630	1	0	1	2	0	0	0	0	0	0	1	1	2	1	0	2	1	1	7	0	0	0	0
UP000001235	395494	Gallionella capsiferriformans ES-2	2853	1	0	1	4	1	0	1	0	0	0	4	1	1	0	0	0	1	1	0	0	0	0	0
UP000001258	272558	Bacillus halodurans C-125	4006	1	0	1	5	1	0	0	0	0	0	3	4	4	1	0	1	0	1	13	4	0	0	0
UP000001259	390333	Lactobacillus delbrueckii subsp. bulgaricus ATCC 11842 = JCM 1002	1519	1	0	0	2	0	0	0	0	0	0	2	1	1	2	0	0	0	1	1	0	0	0	0
UP000001274	748280	Pseudogulbenkiania sp. NH8B	3958	1	0	1	3	0	0	0	0	0	0	4	4	6	5	2	0	2	2	19	0	0	0	0
UP000001275	627192	Sphingobium sp. SYK-6	4050	1	1	1	2	0	0	1	0	0	0	7	3	6	5	2	2	3	1	20	2	0	0	0
UP000001279	1069534	Lactobacillus ruminis ATCC 27782	1851	1	0	1	2	0	0	1	0	0	0	1	0	1	2	0	0	0	1	2	1	0	0	0
UP000001285	714313	Lactobacillus sanfranciscensis TMW 1.1304	1263	0	0	1	1	0	0	0	0	0	0	2	1	2	0	0	0	0	1	1	0	0	0	0
UP000001290	944547	Arcobacter sp. L	2838	0	3	2	2	0	0	0	0	0	0	2	0	3	0	0	0	2	1	1	3	0	0	0
UP000001299	515622	Butyrivibrio proteoclasticus B316	3799	1	0	0	6	1	0	2	0	0	0	7	2	1	2	0	0	0	1	2	1	0	0	0
UP000001302	314260	Parvularcula bermudensis HTCC2503	2687	1	0	1	0	0	0	0	0	0	0	4	2	5	6	0	0	0	3	4	0	0	0	0
UP000001303	871271	Candidatus Zinderia insecticola CARI	206	0	0	0	0	0	0	0	0	0	0	0	0	0	0	0	0	0	0	0	0	0	0	0
UP000001306	281090	Leifsonia xyli subsp. xyli str. CTCB07	2001	0	0	0	2	0	0	1	1	1	1	3	2	3	1	0	0	1	1	4	0	0	0	0
UP000001313	298653	Frankia sp. EAN1pec	7133	1	2	1	5	0	0	2	2	1	1	11	10	44	10	0	9	5	9	25	1	0	0	0
UP000001316	366602	Caulobacter sp. K31	5373	1	1	1	4	0	0	0	0	0	0	4	10	19	6	2	3	7	1	18	1	0	0	0
UP000001319	334413	Finegoldia magna ATCC 29328	1813	1	1	1	1	1	0	1	0	0	0	2	0	0	0	0	0	0	0	1	2	0	0	0
UP000001325	1196322	Clostridium sp. Maddingley MBC34-26	5778	1	1	1	6	1	0	1	0	0	0	9	3	2	2	0	0	1	1	4	8	0	0	0
UP000001332	864702	Oscillatoriales cyanobacterium JSC-12	4673	2	1	0	5	1	1	1	0	0	0	10	1	3	11	0	1	0	1	3	1	0	0	0
UP000001342	883080	Afipia felis ATCC 53690	4036	1	0	1	2	0	0	1	0	0	1	5	2	7	6	2	0	1	1	8	1	0	0	0
UP000001349	394503	Clostridium cellulolyticum H10	3287	0	0	0	3	2	0	1	0	0	0	1	0	5	0	0	1	0	7	1	3	0	0	0
UP000001351	378806	Stigmatella aurantiaca DW4/3-1	8307	2	1	3	3	1	1	1	1	2	1	7	4	17	15	0	3	4	20	13	0	0	0	1
UP000001355	315750	Bacillus pumilus SAFR-032	3700	0	0	0	4	0	0	0	0	0	0	4	3	7	4	0	0	0	4	5	3	0	0	0
UP000001361	883	Desulfovibrio vulgaris str. Miyazaki F	3178	0	0	0	2	1	0	1	0	0	0	5	0	1	1	0	0	0	1	3	3	0	0	0
UP000001362	243159	Acidithiobacillus ferrooxidans ATCC 23270	3120	1	1	1	1	1	0	1	0	0	0	7	0	2	2	0	0	0	1	2	0	0	0	0
UP000001364	565050	Caulobacter vibrioides NA1000	3859	1	1	1	1	0	0	0	0	0	0	5	6	9	7	0	1	3	1	13	0	0	0	0
UP000001366	123214	Persephonella marina EX-H1	2048	0	0	1	3	0	0	0	0	0	0	2	0	2	1	0	0	0	1	1	0	0	0	0
UP000001368	553483	Steptococcus equi subsp. zooepidemicus H70	1851	0	0	0	4	1	0	1	0	0	0	2	1	3	0	0	0	0	1	3	1	0	0	0
UP000001369	204536	Sulfurihydrogenibium azorense Az-Fu1	1708	0	0	1	4	1	1	0	0	0	0	7	0	2	0	0	0	0	1	2	1	0	0	0
UP000001377	479437	Eggerthella lenta DSM 2243	3054	1	1	1	2	0	0	0	0	0	0	1	0	5	1	0	0	3	1	3	1	0	0	0
UP000001382	526225	Geodermatophilus obscurus DSM 43160	4795	1	2	1	2	0	0	1	3	1	1	11	3	8	21	1	1	5	2	12	1	0	0	2
UP000001383	458233	Macrococcus caseolyticus JCSC5402	2059	1	0	1	1	1	0	1	1	0	0	2	0	4	2	0	0	0	1	4	0	0	0	0
UP000001397	862751	Streptomyces sp. SirexAA-E	6354	1	1	2	7	0	0	1	3	1	1	4	3	16	12	0	3	5	4	18	1	0	0	0
UP000001399	648757	Rhodomicrobium vannielii ATCC 17100	3513	1	1	1	3	1	0	1	0	0	0	5	2	10	2	1	1	3	1	4	1	1	0	1
UP000001401	649639	Bacillus cellulosilyticus DSM 2522	4253	2	0	1	2	0	0	0	0	0	0	3	2	5	1	0	1	0	1	3	2	0	0	0
UP000001405	1453429	Candidatus Atelocyanobacterium thalassa isolate ALOHA	1199	1	0	0	3	0	0	0	0	0	0	1	0	1	0	0	0	0	1	1	1	0	0	0
UP000001408	189518	Leptospira interrogans serovar Lai str. 56601	3676	1	1	0	5	0	0	0	0	0	0	2	2	2	3	0	0	4	0	1	1	1	0	0
UP000001409	196164	Corynebacterium efficiens YS-314	2945	0	2	0	2	0	0	1	1	1	1	4	2	1	3	0	0	1	0	5	1	0	0	0
UP000001412	212717	Clostridium tetani E88	2415	0	0	0	1	0	0	0	0	0	0	0	1	0	1	0	0	1	1	3	4	1	0	0
UP000001414	226186	Bacteroides thetaiotaomicron VPI-5482	4782	2	0	1	5	1	0	1	0	0	0	4	0	4	0	0	0	1	1	1	1	0	0	0
UP000001415	226185	Enterococcus faecalis V583	3240	0	0	0	2	0	0	0	0	0	0	1	1	7	2	0	0	1	1	3	5	0	0	0
UP000001416	228410	Nitrosomonas europaea ATCC 19718	2375	1	0	0	4	1	0	1	0	0	0	4	2	1	1	0	0	0	1	1	0	0	0	0
UP000001417	226900	Bacillus cereus ATCC 14579	5240	1	1	1	5	1	0	1	0	0	0	4	4	6	9	0	1	1	1	7	1	0	0	0
UP000001418	710127	Mycoplasma gallisepticum str. R(low)	761	0	0	0	0	0	0	0	0	0	0	0	0	0	0	0	0	1	0	2	0	1	0	0
UP000001420	167539	Prochlorococcus marinus subsp. marinus str. CCMP1375	1881	1	0	0	3	1	1	1	0	0	0	3	0	3	1	0	0	0	1	1	1	0	0	0
UP000001422	84588	Synechococcus sp. WH 8102	2512	1	1	0	4	1	1	1	1	0	0	2	0	3	2	0	0	0	1	1	1	0	0	0
UP000001423	74547	Prochlorococcus marinus str. MIT 9313	2830	1	1	0	3	1	1	1	0	0	0	2	0	5	2	0	0	0	1	1	1	0	0	0
UP000001424	243365	Chromobacterium violaceum ATCC 12472	4397	1	1	1	3	0	0	0	0	0	0	4	3	6	4	1	0	2	1	9	1	0	0	0
UP000001425	1111708	Synechocystis sp. PCC 6803 substr. Kazusa	3507	1	0	0	6	1	1	1	0	0	0	6	1	5	7	0	1	0	1	3	1	1	0	0
UP000001426	258594	Rhodopseudomonas palustris CGA009	4811	1	0	1	3	1	0	1	0	0	1	2	6	19	7	1	2	8	2	7	2	0	0	0
UP000001430	167546	Prochlorococcus marinus str. MIT 9301	1906	1	0	1	3	1	1	1	0	0	0	3	0	3	0	0	1	0	1	1	1	0	0	0
UP000001432	416269	Actinobacillus pleuropneumoniae serovar 5b str. L20	2004	0	0	1	1	1	0	1	0	0	0	0	0	1	1	0	0	0	1	3	2	0	0	0
UP000001436	267608	Ralstonia solanacearum GMI1000	5002	1	1	1	2	1	0	1	0	0	0	1	5	15	5	1	2	3	3	14	1	0	0	0
UP000001441	572477	Allochromatium vinosum DSM 180	3211	1	1	1	3	3	0	1	0	0	1	5	1	3	6	0	0	0	1	0	0	0	0	0
UP000001442	443143	Geobacter sp. M18	4406	2	0	3	3	1	0	2	0	0	1	6	4	2	4	0	0	1	2	4	3	0	0	0
UP000001444	680198	Streptomyces scabiei 87.22	8700	1	2	2	4	0	0	2	3	2	2	8	7	21	17	0	2	6	5	33	3	0	0	1
UP000001453	525284	Gardnerella vaginalis ATCC 14019	1365	1	0	0	2	0	0	1	0	0	0	1	1	1	1	0	0	0	0	1	1	0	0	0
UP000001473	645127	Corynebacterium kroppenstedtii DSM 44385	2018	0	2	1	3	0	0	1	0	0	1	4	2	3	1	0	0	1	0	4	0	0	0	0
UP000001476	515620	Eubacterium eligens ATCC 27750	2761	1	0	0	1	1	0	2	0	0	0	0	0	2	0	0	0	0	1	2	2	0	0	0
UP000001477	515619	Eubacterium rectale ATCC 33656	3545	1	0	0	1	2	0	1	0	0	0	1	1	0	1	0	0	0	1	1	3	0	0	0
UP000001485	634503	Edwardsiella ictaluri 93-146	3686	1	0	2	3	1	0	1	0	0	0	4	1	0	4	0	0	0	1	5	1	0	0	0
UP000001489	634504	Bartonella grahamii as4aup	1709	1	0	1	1	0	0	0	0	0	0	0	0	2	0	0	0	1	1	1	0	0	0	0
UP000001491	572263	Mycoplasma conjunctivae HRC/581	695	0	0	0	0	0	0	0	0	0	0	1	0	0	0	0	0	0	0	0	0	0	0	0
UP000001492	573065	Asticcacaulis excentricus CB 48	3743	1	1	1	2	0	0	0	1	0	0	4	1	6	4	1	0	1	1	6	0	0	0	0
UP000001498	553174	Prevotella melaninogenica ATCC 25845	2288	0	0	0	2	1	0	1	0	0	0	2	0	0	0	0	0	1	1	0	0	0	0	0
UP000001505	716544	Waddlia chondrophila WSU 86-1044	1919	0	0	0	1	0	0	1	0	0	1	1	0	2	0	0	1	0	1	4	1	0	0	0
UP000001508	589865	Desulfurivibrio alkaliphilus AHT 2	2595	0	0	0	5	0	0	1	0	0	0	4	0	1	0	0	0	0	1	1	3	1	0	0
UP000001510	449447	Microcystis aeruginosa NIES-843	5981	1	1	0	6	1	1	1	0	0	0	6	0	5	6	0	0	0	5	5	1	0	0	0
UP000001511	551115	Nostoc azollae 0708	3646	1	0	0	4	1	1	1	0	0	0	9	0	3	4	0	0	0	2	4	1	0	0	0
UP000001512	531844	Flavobacteriaceae bacterium 3519-10	2533	1	0	1	2	1	0	1	0	0	0	4	2	1	1	0	1	1	1	4	0	1	0	0
UP000001520	639282	Deferribacter desulfuricans SSM1	2338	0	0	1	2	0	0	0	0	0	0	5	2	2	0	0	1	0	1	2	1	0	0	0
UP000001522	679897	Helicobacter mustelae 12198	1400	1	0	1	0	0	0	0	0	0	0	2	1	2	0	0	0	0	1	1	0	0	0	0
UP000001544	398511	Bacillus pseudofirmus OF4	4310	1	0	0	2	1	0	0	0	0	0	2	5	6	5	0	0	1	2	12	2	0	0	0
UP000001549	656024	Frankia symbiont of Datisca glomerata	4063	1	0	1	5	0	1	1	1	1	1	8	6	10	5	0	0	5	4	6	0	0	0	2
UP000001550	640512	Burkholderia sp. CCGE1003	5983	1	2	1	4	2	0	1	1	0	0	14	6	18	13	1	4	4	2	31	1	0	0	0
UP000001551	663278	Ethanoligenens harbinense YUAN-3	2663	1	1	1	5	1	0	1	0	0	0	2	0	4	0	0	0	0	2	4	6	0	0	0
UP000001556	349161	Desulfotomaculum reducens MI-1	3220	0	0	2	5	2	1	1	0	0	0	3	4	1	0	0	0	1	1	1	3	1	0	0
UP000001558	323850	Shewanella loihica PV-4	3855	1	0	1	1	0	0	1	0	0	0	1	2	3	4	0	1	0	2	10	2	0	0	0
UP000001565	357244	Orientia tsutsugamushi str. Boryong	966	0	0	1	0	0	0	0	0	0	0	1	0	1	0	0	0	0	1	0	0	0	0	0
UP000001566	32051	Synechococcus sp. WH 7803	2530	1	1	0	3	1	1	1	1	0	0	4	0	4	2	0	0	0	1	1	2	0	0	0
UP000001570	224308	Bacillus subtilis subsp. subtilis str. 168	4260	0	0	0	3	1	0	1	0	0	0	4	3	16	5	0	1	1	4	9	3	0	0	0
UP000001572	293826	Alkaliphilus metalliredigens QYMF	4467	0	0	1	3	1	0	1	0	0	0	1	1	0	0	0	0	1	1	0	1	0	0	0
UP000001578	420246	Geobacillus thermodenitrificans NG80-2	3424	0	0	0	2	1	0	1	1	0	0	6	3	9	1	0	0	2	1	9	4	1	0	0
UP000001584	83332	Mycobacterium tuberculosis H37Rv	3993	1	1	0	3	1	1	1	1	1	1	5	4	9	8	0	3	6	12	8	0	0	0	6
UP000001591	414684	Rhodospirillum centenum SW	3984	1	1	1	4	0	0	2	0	0	0	4	4	8	6	0	0	4	1	5	0	0	0	0
UP000001596	311402	Agrobacterium vitis S4	5353	1	1	1	4	2	0	2	1	0	0	3	2	11	4	1	1	3	5	20	4	0	0	0
UP000001600	311403	Agrobacterium radiobacter K84	6674	1	1	1	1	0	0	1	0	0	0	6	3	32	8	1	2	4	2	20	4	0	0	0
UP000001601	398720	Leeuwenhoekiella blandensis MED217	3687	2	0	1	2	0	0	1	0	1	1	3	2	8	3	0	1	0	1	5	0	0	0	0
UP000001602	313603	Maribacter sp. HTCC2170	3411	0	3	0	2	0	0	1	0	0	0	3	2	9	3	0	0	1	1	5	1	2	0	0
UP000001603	314292	Photobacterium angustum S14	4552	1	0	2	1	0	0	0	0	0	0	2	0	3	10	1	0	1	1	5	2	0	0	0
UP000001619	522306	Candidatus Accumulibacter phosphatis clade IIA str. UW-1	4438	1	4	2	1	1	0	2	0	0	1	3	3	6	6	1	1	3	1	4	0	1	0	1
UP000001623	536019	Mesorhizobium opportunistum WSM2075	6496	1	2	1	2	1	0	1	0	0	0	6	2	33	13	1	4	6	1	25	0	0	0	0
UP000001624	592316	Pantoea sp. At-9b	5760	1	1	2	2	1	0	1	0	0	0	1	0	17	12	0	0	0	3	18	8	0	0	0
UP000001625	580332	Sideroxydans lithotrophicus ES-1	2977	1	0	1	5	1	0	1	0	0	0	2	1	0	1	0	1	0	1	0	0	0	0	0
UP000001626	580327	Thermoanaerobacterium thermosaccharolyticum DSM 571	2583	0	0	1	3	0	0	0	0	1	0	4	1	1	0	0	0	0	1	2	2	0	0	0
UP000001629	153948	Nitrosomonas sp. AL212	2841	1	1	1	2	1	0	1	0	0	0	1	2	1	3	0	0	0	1	3	0	0	0	0
UP000001635	880070	Cyclobacterium marinum DSM 745	4983	2	1	1	2	1	0	1	0	0	0	6	2	8	4	0	1	1	1	5	1	1	0	0
UP000001636	1029718	Candidatus Arthromitus sp. SFB-mouse-Japan	1487	0	0	0	1	0	0	0	0	0	0	2	0	1	1	0	0	0	1	1	1	0	0	0
UP000001651	321967	Lactobacillus paracasei ATCC 334	2708	1	0	2	1	1	0	1	0	0	0	1	1	3	3	0	1	0	1	4	1	0	0	0
UP000001652	387344	Lactobacillus brevis ATCC 367	2201	1	0	3	1	0	0	0	0	0	0	1	1	6	2	0	0	0	1	2	2	0	0	0
UP000001654	655815	Zunongwangia profunda SM-A87	4633	2	0	2	2	0	0	2	0	0	1	5	2	9	5	0	4	0	1	7	0	0	0	0
UP000001660	330214	Nitrospira defluvii	4263	1	2	2	7	0	0	1	0	0	0	11	1	2	2	0	0	0	1	5	1	0	0	0
UP000001661	574087	Acetohalobium arabaticum DSM 5501	2276	0	0	1	3	2	2	0	0	0	0	3	1	1	0	0	0	0	1	1	3	0	0	0
UP000001662	610130	Clostridium saccharolyticum WM1	4133	1	0	1	4	1	0	2	0	0	0	2	0	3	1	0	0	0	1	4	5	0	0	0
UP000001681	262543	Exiguobacterium sibiricum 255-15	3005	1	1	1	1	1	1	0	0	0	1	2	2	7	0	0	1	0	1	7	3	0	0	0
UP000001683	457570	Natranaerobius thermophilus JW/NM-WN-LF	2847	0	0	1	1	1	0	1	0	0	0	2	1	1	1	0	0	0	1	1	2	1	0	0
UP000001685	455632	Streptomyces griseus subsp. griseus NBRC 13350	7008	1	2	2	7	0	0	1	2	1	1	5	5	10	16	0	1	5	9	20	0	0	0	1
UP000001688	32049	Synechococcus sp. PCC 7002	3179	1	0	0	3	3	1	1	0	0	0	5	0	3	6	0	2	0	1	1	1	0	0	0
UP000001691	471821	uncultured Termite group 1 bacterium phylotype Rs-D17	767	0	0	0	1	0	0	0	0	0	0	0	0	0	0	0	0	0	1	1	0	0	0	0
UP000001692	977880	Cupriavidus taiwanensis LMG 19424	5838	2	4	1	4	0	0	1	0	0	0	8	9	15	15	1	3	5	1	20	4	0	0	0
UP000001693	395495	Leptothrix cholodnii SP-6	4343	1	3	2	2	1	0	1	0	0	0	4	4	9	5	1	1	3	1	9	1	0	0	0
UP000001695	395963	Beijerinckia indica subsp. indica ATCC 9039	3774	1	2	1	2	0	0	0	0	0	0	6	3	14	9	3	2	5	2	11	0	0	0	0
UP000001700	515618	Candidatus Riesia pediculicola USDA	540	0	0	0	1	0	0	0	0	0	0	0	0	0	1	0	0	0	1	0	0	0	0	0
UP000001702	706191	Pantoea ananatis LMG 20103	4241	1	1	2	3	1	0	1	0	0	0	3	0	7	4	0	1	0	1	10	4	0	0	0
UP000001726	465817	Erwinia tasmaniensis Et1/99	3618	1	0	2	2	1	0	1	0	0	0	1	2	4	3	0	1	0	1	7	0	0	0	0
UP000001727	504474	Corynebacterium urealyticum DSM 7109	2011	0	3	1	3	0	0	0	0	0	0	2	2	0	1	0	0	1	0	5	0	0	0	0
UP000001730	316275	Aliivibrio salmonicida LFI1238	3513	0	0	0	5	1	0	0	0	0	0	4	0	1	5	0	1	1	1	4	1	0	0	0
UP000001732	309798	Coprothermobacter proteolyticus DSM 5265	1481	0	0	0	2	1	1	0	0	0	0	3	1	1	0	0	0	0	2	0	3	1	0	0
UP000001739	398527	Paraburkholderia phytofirmans PsJN	7197	1	2	1	5	2	0	1	0	0	0	11	6	23	11	2	6	7	2	38	0	0	0	0
UP000001741	509170	Acinetobacter baumannii SDF	2767	2	0	1	2	0	0	0	0	0	0	3	2	3	1	0	2	1	1	7	2	0	0	1
UP000001784	335543	Syntrophobacter fumaroxidans MPOB	4012	0	0	0	3	0	0	1	0	0	0	6	2	1	1	0	0	0	1	5	1	3	0	0
UP000001803	565034	Brachyspira hyodysenteriae WA1	2642	0	0	0	3	1	1	0	0	0	0	0	2	0	1	0	0	0	1	1	2	0	0	0
UP000001806	107806	Buchnera aphidicola str. APS (Acyrthosiphon pisum)	572	0	0	0	1	0	0	0	0	0	0	0	0	1	0	0	0	0	0	0	0	0	0	0
UP000001807	224326	Borrelia burgdorferi B31	1290	0	0	0	0	0	0	0	0	0	0	1	1	0	0	0	0	0	0	0	0	0	0	0
UP000001816	190650	Caulobacter vibrioides CB15	3720	1	1	1	1	0	0	0	0	0	0	5	6	9	7	0	1	3	1	13	0	0	0	0
UP000001817	266265	Paraburkholderia xenovorans LB400	8591	1	2	1	5	2	0	1	0	0	0	15	12	36	18	3	8	11	2	49	1	0	0	0
UP000001818	316057	Rhodopseudomonas palustris BisB5	4392	1	1	1	2	1	0	1	0	0	1	3	8	18	5	1	2	8	1	5	1	0	0	0
UP000001820	266779	Chelativorans sp. BNC1	4530	1	1	1	2	0	0	2	1	0	1	1	2	19	3	1	0	4	2	23	3	0	0	0
UP000001822	269798	Cytophaga hutchinsonii ATCC 33406	3771	1	0	1	3	0	0	1	0	0	0	5	2	2	1	0	2	1	1	4	1	0	0	0
UP000001844	472759	Nitrosococcus halophilus Nc 4	3770	1	0	1	3	1	1	2	0	0	1	10	1	2	4	0	0	0	1	6	0	0	0	0
UP000001845	512564	Mycoplasma crocodyli MP145	689	0	0	0	0	0	0	0	1	0	0	0	0	0	0	0	0	0	0	1	1	0	0	0
UP000001847	456481	Leptospira biflexa serovar Patoc strain Patoc 1 (Paris)	3723	1	2	1	3	0	1	0	0	0	0	1	1	5	1	0	1	3	0	3	0	0	0	0
UP000001868	450851	Phenylobacterium zucineum HLK1	3838	1	1	1	4	0	0	0	0	0	0	4	6	10	6	2	2	5	1	11	0	0	0	0
UP000001870	1774373	Alteromonas mediterranea DE	3935	1	1	2	1	1	0	2	0	0	0	4	2	3	7	0	2	2	1	7	2	1	0	1
UP000001872	380749	Hydrogenobaculum sp. Y04AAS1	1626	0	0	1	2	1	0	1	0	0	0	3	0	1	0	0	0	0	1	2	0	0	0	0
UP000001877	358681	Brevibacillus brevis NBRC 100599	5887	0	0	0	6	0	0	0	0	0	0	6	6	10	10	0	0	1	2	10	3	0	0	0
UP000001880	502025	Haliangium ochraceum DSM 14365	6684	1	0	2	3	0	0	1	0	0	1	6	4	13	7	0	1	1	8	10	1	0	0	0
UP000001883	680646	Rothia mucilaginosa DY-18	1991	1	1	1	2	0	0	0	0	0	0	1	0	1	0	0	0	1	1	1	0	0	0	0
UP000001887	530564	Pirellula staleyi DSM 6068	4711	1	0	0	2	1	0	2	0	0	0	5	2	8	5	0	0	0	1	5	0	0	0	0
UP000001889	637910	Citrobacter rodentium ICC168	4792	1	0	2	3	1	0	1	0	0	0	2	1	6	6	0	0	0	2	12	5	0	0	0
UP000001890	380358	Xanthomonas albilineans GPE PC73	3190	1	0	1	2	1	0	1	0	0	0	3	1	5	3	0	0	0	1	7	0	0	0	1
UP000001902	591001	Acidaminococcus fermentans DSM 20731	2016	1	0	1	3	1	0	1	0	0	0	0	2	0	1	0	0	0	1	1	2	0	0	0
UP000001908	644283	Micromonospora aurantiaca ATCC 27029	6204	1	2	1	3	2	0	1	2	0	1	8	5	12	9	0	4	3	8	13	1	0	0	0
UP000001910	523794	Leptotrichia buccalis C-1013-b	2218	0	0	0	3	1	1	0	0	0	0	2	0	0	0	0	0	0	1	1	3	0	0	0
UP000001915	526224	Brachyspira murdochii DSM 12563	2751	0	0	0	2	1	1	0	0	0	0	0	2	1	1	0	0	0	1	1	3	0	0	0
UP000001916	526227	Meiothermus silvanus DSM 9946	3383	1	1	1	5	1	1	0	1	0	0	6	2	8	3	0	0	2	1	7	0	1	0	0
UP000001917	521098	Alicyclobacillus acidocaldarius subsp. acidocaldarius DSM 446	3059	1	0	1	1	0	0	0	0	0	0	3	4	9	4	0	0	1	1	7	5	0	0	0
UP000001918	471852	Thermomonospora curvata DSM 43183	4888	1	0	1	5	0	0	1	1	1	1	4	6	10	9	0	0	4	4	12	1	0	0	0
UP000001919	446465	Brachybacterium faecium DSM 4810	3062	0	2	0	3	0	0	1	2	1	1	7	1	6	2	0	1	2	1	5	0	0	0	0
UP000001929	269796	Rhodospirillum rubrum ATCC 11170	3835	1	0	1	2	1	0	1	0	0	1	5	6	5	6	2	0	4	2	9	1	1	0	0
UP000001932	343509	Sodalis glossinidius str. morsitans	2490	1	0	2	2	0	0	0	0	0	0	4	0	1	2	0	0	1	1	3	0	0	0	0
UP000001933	56780	Syntrophus aciditrophicus SB	3145	0	0	0	5	1	0	1	0	0	0	3	1	0	1	0	0	0	1	2	1	4	0	0
UP000001935	290397	Anaeromyxobacter dehalogenans 2CP-C	4345	0	0	1	4	1	1	0	1	0	0	10	3	4	4	0	0	3	2	3	0	1	0	1
UP000001936	347834	Rhizobium etli CFN 42	5921	1	2	1	2	1	0	2	1	0	0	5	4	22	13	1	3	3	1	20	2	0	0	0
UP000001937	106370	Frankia casuarinae	4441	1	0	0	7	0	0	1	1	1	1	7	2	3	6	0	2	3	5	7	0	0	0	0
UP000001938	321332	Synechococcus sp. JA-2-3Ba(2-13)	2835	1	0	0	3	2	1	1	0	0	0	2	0	2	5	0	0	0	1	3	1	0	0	0
UP000001942	222891	Neorickettsia sennetsu str. Miyayama	932	0	0	0	0	0	0	0	0	0	0	0	0	1	0	0	0	0	1	0	1	0	0	0
UP000001943	212042	Anaplasma phagocytophilum str. HZ	1330	0	0	0	0	0	0	0	0	0	0	0	0	1	1	0	0	0	1	1	0	0	0	0
UP000001946	138119	Desulfitobacterium hafniense Y51	5014	1	0	2	3	1	0	1	0	0	0	2	6	4	5	0	0	0	1	2	2	1	0	0
UP000001947	203122	Saccharophagus degradans 2-40	3999	1	0	1	1	0	0	1	0	0	0	2	1	4	3	1	1	1	2	4	0	0	0	0
UP000001948	316056	Rhodopseudomonas palustris BisB18	4864	1	0	1	2	1	0	1	0	0	1	5	9	14	9	2	1	5	4	7	3	0	0	0
UP000001951	336407	Rickettsia bellii RML369-C	1400	0	0	1	2	0	0	0	0	0	0	1	1	2	1	1	1	0	1	1	0	0	0	0
UP000001953	323097	Nitrobacter hamburgensis X14	4243	1	1	1	3	0	0	1	0	0	1	3	1	3	2	1	0	4	1	4	0	0	0	0
UP000001955	630626	Shimwellia blattae DSM 4481 = NBRC 105725	3870	2	0	3	2	1	0	1	0	0	0	3	2	4	5	0	0	0	2	8	4	0	0	0
UP000001959	228405	Hyphomonas neptunium ATCC 15444	3499	1	1	1	1	0	0	0	0	0	0	2	4	9	5	2	2	5	2	11	1	0	0	0
UP000001961	64471	Synechococcus sp. CC9311	2882	1	1	0	2	1	1	1	1	0	0	3	0	4	0	0	0	0	1	3	2	0	0	0
UP000001962	187272	Alkalilimnicola ehrlichii MLHE-1	2862	1	0	1	2	1	0	1	0	0	0	2	3	2	4	4	1	2	1	3	0	0	0	0
UP000001963	391165	Granulibacter bethesdensis CGDNIH1	2565	1	1	1	2	1	0	1	0	0	1	4	1	3	2	1	1	1	1	4	0	0	0	0
UP000001964	394221	Maricaulis maris MCS10	3060	1	1	1	2	0	0	0	0	0	0	1	3	3	7	1	3	3	1	6	1	0	0	0
UP000001966	335283	Nitrosomonas eutropha C91	2473	1	0	0	4	1	0	1	0	0	0	4	2	1	2	0	0	0	1	3	0	0	0	0
UP000001968	335541	Syntrophomonas wolfei subsp. wolfei str. Goettingen G311	2473	0	0	1	2	0	0	0	0	0	0	2	3	0	2	0	0	3	1	0	1	2	0	0
UP000001973	100226	Streptomyces coelicolor A3(2)	8038	1	1	2	4	0	0	2	3	2	2	6	6	15	15	0	5	6	5	21	1	0	0	1
UP000001976	266834	Sinorhizobium meliloti 1021	6169	1	3	1	2	2	0	1	1	0	0	7	4	23	11	1	1	7	2	24	3	0	0	0
UP000001977	360910	Bordetella avium 197N	3372	1	2	1	3	0	0	0	0	0	0	10	3	12	3	0	0	1	1	11	1	0	0	0
UP000001978	272563	Clostridioides difficile 630	3762	0	0	1	1	1	0	0	0	0	0	0	3	3	2	0	0	0	1	4	5	1	0	0
UP000001981	342610	Pseudoalteromonas atlantica T6c	4271	1	0	2	4	1	0	2	0	0	0	6	2	9	6	0	0	3	1	13	3	1	0	0
UP000001982	318161	Shewanella denitrificans OS217	3727	0	0	1	4	0	0	0	0	0	0	0	1	3	5	0	0	2	2	9	3	0	0	0
UP000001983	296591	Polaromonas sp. JS666	5437	1	1	1	3	0	0	0	0	0	0	4	5	13	5	2	1	5	1	19	3	0	0	0
UP000001986	441771	Clostridium botulinum A str. Hall	3590	0	0	0	3	0	0	0	0	0	0	4	1	1	1	0	0	0	1	3	5	0	0	0
UP000001989	392499	Sphingomonas wittichii RW1	5313	1	2	1	2	0	0	0	0	0	0	5	12	33	13	0	1	8	2	31	2	0	0	0
UP000001991	557436	Lactobacillus reuteri DSM 20016	1865	1	0	2	1	0	0	0	0	0	0	1	1	2	1	0	0	0	1	2	2	0	0	0
UP000001993	349106	Psychrobacter sp. PRwf-1	2339	1	1	1	1	0	0	0	0	0	0	2	2	5	5	0	4	1	1	6	1	0	0	1
UP000001994	114615	Bradyrhizobium sp. ORS 278	6701	1	2	1	3	2	0	1	1	0	0	5	7	21	17	2	1	4	1	9	1	0	0	0
UP000002007	288705	Renibacterium salmoninarum ATCC 33209	3421	1	2	1	1	0	0	0	5	0	1	3	3	8	4	0	2	5	2	8	0	0	0	0
UP000002008	324602	Chloroflexus aurantiacus J-10-fl	3850	1	0	1	8	1	1	1	0	0	1	15	3	5	11	0	1	1	1	5	1	0	0	0
UP000002010	557598	Laribacter hongkongensis HLHK9	3208	1	1	1	3	0	0	0	0	0	0	1	3	1	3	1	0	2	1	6	1	0	0	0
UP000002011	471854	Dyadobacter fermentans DSM 18053	5703	3	0	1	3	0	0	3	2	0	1	7	2	13	6	0	1	1	1	6	0	0	0	0
UP000002012	522772	Denitrovibrio acetiphilus DSM 12809	2901	1	0	3	5	2	1	0	0	0	0	4	0	2	1	0	0	0	1	3	2	0	0	0
UP000002015	425104	Shewanella sediminis HAW-EB3	4493	0	0	1	3	0	0	0	0	0	0	0	1	4	8	0	2	3	2	10	4	1	0	0
UP000002016	416591	Pseudothermotoga lettingae TMO	2040	0	0	1	3	1	1	0	0	0	0	5	0	2	2	0	0	1	1	1	1	1	0	0
UP000002019	459349	Candidatus Cloacimonas acidaminovorans str. Evry	1813	0	0	2	3	1	0	0	0	0	0	4	0	1	0	0	0	0	1	1	2	0	0	0
UP000002020	482235	Candidatus Phytoplasma mali AT	448	0	0	0	0	0	0	0	0	0	0	0	0	0	0	0	0	0	0	0	0	0	0	0
UP000002026	471855	Slackia heliotrinireducens DSM 20476	2750	1	1	0	2	1	0	1	0	0	0	0	0	5	6	0	0	0	1	2	1	0	0	0
UP000002027	479434	Sphaerobacter thermophilus DSM 20745	3471	0	0	0	3	0	0	1	0	0	1	12	1	7	4	0	0	2	2	2	0	1	0	0
UP000002028	504472	Spirosoma linguale DSM 74	6867	1	0	1	1	0	0	1	1	1	1	11	2	12	9	0	3	2	2	6	1	1	0	0
UP000002029	479432	Streptosporangium roseum DSM 43021	8955	1	2	1	4	0	0	1	4	2	1	11	8	19	15	0	3	4	4	22	1	0	0	0
UP000002030	525903	Thermanaerovibrio acidaminovorans DSM 6589	1737	1	0	2	2	1	0	1	0	0	0	2	0	0	0	0	0	0	1	0	2	0	0	0
UP000002033	582899	Hyphomicrobium denitrificans ATCC 51888	3452	1	4	1	1	0	0	0	0	0	0	2	1	7	2	1	1	3	2	5	0	0	0	0
UP000002034	581103	Geobacillus sp. Y4.1MC1	3602	0	0	0	2	1	0	1	0	0	0	2	3	6	0	0	0	1	1	12	7	0	0	0
UP000002040	137722	Azospirillum sp. B510	6092	1	1	1	4	1	0	1	0	0	0	6	7	17	10	0	0	6	3	19	2	0	0	0
UP000002043	638303	Thermocrinis albus DSM 14484	1592	0	0	2	2	1	0	1	0	0	0	6	0	1	0	0	0	0	1	1	0	0	0	0
UP000002045	406818	Xenorhabdus bovienii SS-2004	4102	1	0	2	2	0	0	0	0	0	0	5	0	5	3	0	2	0	4	9	2	0	0	0
UP000002066	591167	Streptomyces pratensis ATCC 33331	6558	1	1	0	5	0	0	1	2	1	1	4	3	12	18	0	1	5	6	17	1	0	0	1
UP000002072	519441	Streptobacillus moniliformis DSM 12112	1431	0	0	0	1	1	1	0	1	0	0	0	0	0	0	0	0	0	0	1	0	0	0	0
UP000002077	548476	Corynebacterium aurimucosum ATCC 700975	2528	0	3	2	3	0	0	1	1	0	1	7	1	1	2	0	0	1	1	7	0	0	0	0
UP000002084	41514	Salmonella enterica subsp. arizonae serovar 62:z4	4500	1	0	2	2	1	0	1	1	0	0	0	1	3	3	0	0	1	2	11	6	1	0	0
UP000002139	448385	Sorangium cellulosum So ce56	9320	1	1	2	3	2	1	1	0	0	0	13	3	12	9	0	2	1	6	12	2	1	0	0
UP000002145	203119	Ruminiclostridium thermocellum ATCC 27405	3105	0	0	1	6	2	0	1	0	0	0	5	0	1	1	0	0	0	1	2	1	0	0	0
UP000002148	388919	Streptococcus sanguinis SK36	2269	0	0	0	2	1	0	1	0	0	0	1	0	0	0	0	1	0	1	2	2	0	0	0
UP000002156	340099	Thermoanaerobacter pseudethanolicus ATCC 33223	2193	0	0	1	4	0	0	0	0	1	0	2	0	0	0	0	0	0	1	1	2	0	0	0
UP000002164	444177	Lysinibacillus sphaericus C3-41	4750	1	1	1	2	0	0	0	0	0	0	3	4	7	4	0	0	0	2	10	2	1	0	0
UP000002166	349519	Leuconostoc citreum KM20	1812	1	0	3	3	0	0	0	1	0	0	1	1	3	1	0	0	0	1	2	1	0	0	0
UP000002168	392500	Shewanella woodyi ATCC 51908	4865	0	0	1	3	0	0	0	0	0	0	0	1	5	10	0	2	1	2	11	1	0	0	0
UP000002171	207954	Neptuniibacter caesariensis	3687	1	2	1	2	0	0	0	0	0	0	2	3	3	1	0	3	4	1	14	1	1	0	0
UP000002172	156586	Flavobacteria bacterium BBFL7	2592	2	0	0	3	1	0	1	0	0	1	3	2	5	1	0	1	1	1	6	0	0	0	0
UP000002185	75379	Thiomonas intermedia K12	3134	1	3	1	2	1	0	1	0	0	0	4	4	1	7	1	0	2	2	4	0	0	0	0
UP000002186	85643	Thauera sp. MZ1T	3927	1	1	1	3	1	0	1	0	0	0	6	3	5	3	5	2	3	1	8	0	1	0	0
UP000002187	626418	Burkholderia glumae BGR1	5660	1	2	1	3	0	0	1	0	0	0	5	5	12	8	2	0	3	7	29	2	0	0	0
UP000002191	643562	Pseudodesulfovibrio aespoeensis Aspo-2	3269	0	0	0	4	0	0	0	0	0	0	8	0	0	1	0	0	0	1	1	1	1	0	0
UP000002192	203907	Candidatus Blochmannia floridanus	583	0	0	0	1	0	0	0	0	0	0	0	0	1	0	0	0	0	1	0	0	0	0	0
UP000002194	882	Desulfovibrio vulgaris str. Hildenborough	3518	0	0	0	2	1	0	1	0	0	0	7	0	1	1	0	1	0	1	2	5	0	0	0
UP000002196	272623	Lactococcus lactis subsp. lactis Il1403	2225	0	0	0	3	1	0	0	0	0	0	1	2	3	2	0	0	0	1	0	1	0	0	0
UP000002198	257309	Corynebacterium diphtheriae NCTC 13129	2265	0	2	0	3	0	0	1	0	0	1	4	0	0	1	0	0	0	1	2	1	0	0	0
UP000002200	203267	Tropheryma whipplei str. Twist	805	0	0	0	1	0	0	0	0	0	0	0	0	1	1	0	0	1	0	0	0	0	0	0
UP000002204	234621	Rhodococcus erythropolis PR4	6424	1	4	0	2	1	1	1	1	0	1	4	19	29	13	0	3	16	1	24	2	0	0	4
UP000002207	240015	Acidobacterium capsulatum ATCC 51196	3363	1	0	0	3	1	0	0	0	0	1	4	2	6	4	0	1	0	2	5	0	0	0	0
UP000002208	546414	Deinococcus deserti VCD115	3459	1	1	1	4	1	0	1	1	0	0	4	5	8	10	0	0	2	1	5	0	0	0	0
UP000002209	379066	Gemmatimonas aurantiaca T-27	3932	1	1	1	2	2	0	1	0	0	0	5	2	8	6	0	3	1	1	4	0	0	0	0
UP000002212	632772	Rhodococcus opacus B4	8170	1	3	0	2	1	1	1	3	1	1	8	21	45	21	1	4	25	2	55	1	0	0	4
UP000002213	446462	Actinosynnema mirum DSM 43827	6912	1	1	1	3	1	1	1	3	1	1	10	4	13	19	0	7	3	9	11	0	0	0	1
UP000002215	485918	Chitinophaga pinensis DSM 2588	7179	2	1	2	3	0	0	1	1	0	0	5	2	26	12	0	11	1	6	8	2	1	0	0
UP000002216	525897	Desulfomicrobium baculatum DSM 4028	3421	0	0	0	4	1	0	1	0	0	0	8	0	1	1	0	0	0	1	2	2	0	0	0
UP000002217	485916	Desulfotomaculum acetoxidans DSM 771	4016	0	0	1	6	3	1	1	0	0	0	4	2	0	0	0	0	0	2	1	1	0	0	0
UP000002218	479431	Nakamurella multipartita DSM 44233	5123	1	4	0	5	0	0	2	2	1	1	7	3	7	14	1	1	2	2	9	6	0	0	1
UP000002219	446468	Nocardiopsis dassonvillei subsp. dassonvillei DSM 43111	5497	1	0	0	4	0	0	1	2	1	1	4	3	13	13	0	3	2	2	12	2	0	0	0
UP000002220	521674	Planctopirus limnophila DSM 3776	4258	1	1	1	2	0	0	2	0	0	0	8	0	8	2	0	0	0	3	7	1	0	0	0
UP000002221	518766	Rhodothermus marinus DSM 4252	2861	1	0	0	2	1	0	1	0	0	0	13	1	7	3	0	0	2	1	4	1	0	0	0
UP000002222	525898	Sulfurospirillum deleyianum DSM 6946	2243	1	1	2	3	0	0	0	0	0	0	1	0	1	1	0	0	0	1	0	2	0	0	0
UP000002231	706194	Candidatus Sulcia muelleri CARI	246	0	0	0	0	0	0	0	0	0	0	0	0	0	0	0	0	0	0	1	0	0	0	0
UP000002247	640132	Segniliparus rotundus DSM 44985	3001	1	1	1	2	1	1	1	1	0	1	4	2	2	8	0	0	5	5	7	0	0	0	0
UP000002255	446471	Xylanimonas cellulosilytica DSM 15894	3441	1	1	2	2	0	0	1	4	1	1	3	3	3	4	0	0	2	1	5	0	0	0	0
UP000002257	395965	Methylocella silvestris BL2	3816	2	2	1	1	1	0	1	0	0	0	4	2	7	6	2	1	3	2	4	0	0	0	0
UP000002287	269482	Burkholderia vietnamiensis G4	7409	1	3	1	4	0	0	1	0	0	0	7	7	18	20	2	0	3	2	30	1	0	0	0
UP000002297	216432	Croceibacter atlanticus HTCC2559	2702	2	0	1	2	0	0	0	0	0	1	4	2	7	2	0	2	2	1	5	1	0	0	0
UP000002301	439375	Ochrobactrum anthropi ATCC 49188	4757	1	1	1	2	0	0	0	0	0	0	3	3	15	3	0	0	4	1	14	1	0	0	0
UP000002318	573413	Sediminispirochaeta smaragdinae DSM 11293	4211	1	0	0	1	1	1	0	0	0	0	3	0	4	1	0	1	0	1	3	8	0	0	0
UP000002334	572265	Candidatus Hamiltonella defensa 5AT (Acyrthosiphon pisum)	2045	0	0	0	2	0	0	0	0	0	0	0	0	2	1	0	0	0	1	1	0	0	0	0
UP000002349	552811	Dehalogenimonas lykanthroporepellens BL-DC-9	1619	0	0	0	3	1	0	1	0	0	0	1	0	1	1	0	0	1	1	0	1	0	0	0
UP000002350	637905	Shewanella violacea DSS12	4336	0	0	1	2	0	0	1	0	0	0	1	1	2	6	0	1	0	2	7	3	0	0	0
UP000002357	443255	Streptomyces clavuligerus ATCC 27064	7290	1	1	1	7	0	0	1	1	1	1	5	7	12	12	0	7	4	7	18	1	0	0	0
UP000002360	688245	Comamonas testosteroni CNB-2	4780	1	1	1	3	0	0	0	0	0	0	1	9	13	4	2	2	5	1	14	4	0	0	0
UP000002361	272942	Rhodobacter capsulatus SB 1003	3632	1	2	1	2	0	0	1	0	0	0	1	4	8	3	1	1	1	1	9	2	0	0	0
UP000002362	762051	Leuconostoc kimchii IMSNU 11154	2128	1	0	3	2	0	0	0	1	0	0	2	0	4	1	0	0	0	1	2	0	0	0	0
UP000002366	572547	Aminobacterium colombiense DSM 12261	1872	0	0	1	3	1	0	1	0	0	0	2	1	2	0	0	0	0	1	1	0	0	0	0
UP000002368	562970	Kyrpidia tusciae DSM 2912	3135	1	0	1	4	0	0	0	0	0	0	3	5	9	4	0	0	4	1	8	1	0	0	0
UP000002371	748671	Lactobacillus crispatus ST1	2003	0	0	0	2	0	0	0	0	0	0	2	1	1	2	0	0	0	1	1	0	0	0	0
UP000002377	635013	Thermincola potens JR	2908	0	0	1	6	3	1	0	0	0	0	4	0	0	0	0	0	0	1	1	2	1	0	0
UP000002381	481743	Paenibacillus sp. Y412MC10	6237	0	0	0	3	1	0	1	0	0	0	1	1	19	4	0	4	0	1	4	3	0	0	0
UP000002382	521045	Kosmotoga olearia TBF 19.5.1	2087	0	0	0	4	1	1	0	1	0	0	2	0	1	0	0	0	1	1	1	2	0	0	0
UP000002383	396588	Thioalkalivibrio sulfidiphilus HL-EbGr7	3272	1	1	1	1	1	0	1	0	0	0	4	1	3	3	0	0	0	1	2	0	0	0	0
UP000002384	65393	Cyanothece sp. PCC 7424	5656	1	0	0	4	1	1	2	2	0	0	3	1	6	8	0	1	0	2	5	1	0	0	0
UP000002386	471223	Geobacillus sp. WCH70	3048	0	0	0	2	0	0	0	0	0	0	5	3	4	1	0	0	1	1	7	2	0	0	0
UP000002402	246197	Myxococcus xanthus DK 1622	7314	1	1	2	3	1	1	2	1	1	1	11	3	13	11	0	2	3	15	10	0	0	0	1
UP000002407	360107	Campylobacter hominis ATCC BAA-381	1687	1	1	2	1	0	0	0	0	0	0	2	0	1	0	0	0	0	1	2	0	0	0	0
UP000002411	431943	Clostridium kluyveri DSM 555	3828	1	0	1	5	2	1	1	0	0	0	1	3	1	0	0	0	1	4	1	8	2	0	0
UP000002415	381764	Fervidobacterium nodosum Rt17-B1	1725	0	0	0	3	1	1	0	1	0	0	5	0	0	0	0	0	1	1	0	3	0	0	0
UP000002417	78245	Xanthobacter autotrophicus Py2	4971	1	3	1	1	0	0	0	0	0	0	7	7	17	8	2	1	5	3	10	2	0	0	0
UP000002420	398767	Geobacter lovleyi SZ	3644	1	0	1	5	1	0	0	0	0	0	3	0	2	3	0	0	1	3	4	4	0	0	0
UP000002424	322710	Azotobacter vinelandii DJ	4990	1	2	1	3	1	0	1	0	0	1	7	6	13	10	0	0	3	4	16	2	0	0	0
UP000002427	374463	Baumannia cicadellinicola str. Hc (Homalodisca coagulata)	595	1	0	0	0	0	0	0	0	0	0	0	0	1	1	0	0	0	1	0	0	0	0	0
UP000002429	266264	Cupriavidus metallidurans CH34	6364	1	5	1	2	0	0	0	0	0	0	5	9	17	12	3	2	10	1	19	1	0	0	0
UP000002430	363253	Lawsonia intracellularis PHE/MN1-00	1342	0	0	0	3	0	0	0	0	0	0	3	0	2	0	0	0	0	1	0	0	0	0	0
UP000002431	319795	Deinococcus geothermalis DSM 11300	3006	1	1	0	4	1	0	1	1	0	0	4	4	5	3	0	1	2	1	4	0	0	0	0
UP000002432	204669	Candidatus Koribacter versatilis Ellin345	4771	1	2	1	3	1	0	0	0	0	0	5	2	3	8	0	0	0	1	7	0	1	0	0
UP000002438	208964	Pseudomonas aeruginosa PAO1	5564	1	2	1	2	1	0	1	0	0	1	3	6	12	13	0	3	4	2	20	1	0	0	0
UP000002440	265072	Methylobacillus flagellatus KT	2609	1	0	1	1	1	0	1	0	0	1	5	0	4	1	0	0	0	1	0	0	0	0	0
UP000002453	484019	Thermosipho africanus TCF52B	1918	0	0	0	3	1	1	0	1	0	0	4	0	1	0	0	0	1	1	1	3	0	0	0
UP000002456	442563	Bifidobacterium animalis subsp. lactis AD011	1525	1	1	0	2	0	0	1	2	0	1	3	0	1	0	0	0	0	0	2	1	0	0	0
UP000002480	272947	Rickettsia prowazekii str. Madrid E	834	0	0	1	1	0	0	0	0	0	0	1	1	1	1	1	0	0	1	0	0	0	0	0
UP000002483	103690	Nostoc sp. PCC 7120	6070	1	1	0	5	2	1	1	0	0	0	10	0	3	8	0	4	0	5	5	2	0	0	0
UP000002484	298654	Frankia inefficax	7079	1	1	2	5	0	1	2	1	2	1	10	14	45	9	0	7	8	8	33	0	0	0	0
UP000002493	223926	Vibrio parahaemolyticus RIMD 2210633	4821	1	1	2	3	1	0	1	0	0	0	3	1	1	8	1	0	1	1	10	4	0	0	0
UP000002495	235279	Helicobacter hepaticus ATCC 51449	1872	1	1	1	2	0	0	0	0	0	0	0	0	1	0	0	0	0	1	1	0	0	0	0
UP000002510	324057	Paenibacillus sp. JDR-2	6210	1	1	1	4	2	0	2	0	0	0	7	2	17	5	0	5	0	1	4	1	0	0	0
UP000002511	395961	Cyanothece sp. PCC 7425	5232	2	1	0	6	2	1	1	0	0	0	9	1	4	15	0	1	0	1	4	1	0	0	0
UP000002512	210007	Streptococcus mutans UA159	1953	0	0	0	3	1	0	1	0	0	0	1	0	2	0	0	0	0	2	2	2	0	0	0
UP000002514	243265	Photorhabdus luminescens subsp. laumondii TTO1	4556	1	0	2	3	0	0	0	0	0	0	6	0	4	5	0	0	1	2	10	3	0	0	0
UP000002515	223283	Pseudomonas syringae pv. tomato str. DC3000	5431	1	0	1	2	1	0	1	0	0	1	1	2	9	9	0	3	3	3	17	2	0	0	0
UP000002521	190304	Fusobacterium nucleatum subsp. nucleatum ATCC 25586	2046	0	0	1	2	1	0	1	0	0	0	1	0	1	1	0	0	1	1	2	1	1	0	0
UP000002522	272633	Mycoplasma penetrans HF-2	1028	0	0	0	0	0	0	0	0	0	0	0	0	0	0	0	0	0	0	3	2	0	0	0
UP000002523	262768	Onion yellows phytoplasma OY-M	730	0	0	0	0	0	0	0	0	0	0	1	0	0	0	0	0	0	0	0	0	0	0	0
UP000002524	243230	Deinococcus radiodurans R1	3085	0	1	0	4	1	0	1	1	0	0	2	3	4	3	0	1	2	1	4	0	0	0	0
UP000002526	224911	Bradyrhizobium diazoefficiens USDA 110	8253	1	2	1	4	2	0	1	1	0	1	8	9	29	21	2	4	11	1	13	3	0	0	0
UP000002528	335992	Candidatus Pelagibacter ubique HTCC1062	1354	0	0	0	0	0	0	0	0	0	0	2	1	2	0	0	0	0	1	7	0	0	0	0
UP000002531	323098	Nitrobacter winogradskyi Nb-255	2980	1	0	1	2	0	0	1	0	0	1	3	3	3	3	1	0	3	1	4	0	0	0	0
UP000002534	338963	Pelobacter carbinolicus DSM 2380	3292	0	0	1	5	1	0	0	0	0	0	5	0	5	1	0	0	0	1	5	3	0	0	0
UP000002535	59920	Prochlorococcus marinus str. NATL2A	2142	1	0	0	3	1	1	1	0	0	0	2	0	3	2	0	0	0	1	1	1	0	0	0
UP000002566	402626	Ralstonia pickettii 12J	4890	1	3	1	4	1	0	1	0	0	0	4	7	14	9	2	2	3	2	11	1	0	0	0
UP000002569	668336	Aggregatibacter actinomycetemcomitans D11S-1	1974	0	0	1	2	1	0	1	0	0	0	0	1	1	3	0	0	0	1	1	0	0	0	0
UP000002572	653733	Desulfurispirillum indicum S5	2551	1	0	2	3	1	1	0	0	0	0	2	2	1	0	0	0	0	1	1	2	0	0	0
UP000002574	608538	Hydrogenobacter thermophilus TK-6	1892	0	0	1	0	1	0	1	0	0	0	7	0	1	0	0	0	0	1	1	0	0	0	0
UP000002586	156889	Magnetococcus marinus MC-1	3594	0	2	1	6	1	0	2	0	0	0	6	1	2	1	0	0	0	1	2	0	1	0	0
UP000002587	413404	Candidatus Ruthia magnifica str. Cm (Calyptogena magnifica)	976	0	0	0	1	0	0	0	0	0	0	1	0	1	0	0	0	0	1	0	0	0	0	0
UP000002588	62928	Azoarcus sp. BH72	3981	1	0	1	3	1	0	1	0	0	1	11	2	7	5	3	0	5	1	9	2	1	0	0
UP000002596	397945	Acidovorax citrulli AAC00-1	4602	1	1	1	2	1	0	1	0	0	1	4	5	11	5	1	2	1	2	10	1	0	0	0
UP000002598	525146	Desulfovibrio desulfuricans ATCC 27774	2345	0	0	0	2	0	0	1	0	0	0	3	0	1	0	0	0	0	3	3	3	0	0	0
UP000002601	526222	Desulfovibrio salexigens DSM 2638	3807	0	0	0	2	1	0	1	0	0	0	2	0	1	0	0	0	0	1	2	5	0	0	0
UP000002608	398579	Shewanella pealeana ATCC 700345	4181	0	0	1	3	0	0	0	0	0	0	2	2	2	4	1	3	5	2	9	2	0	0	0
UP000002620	429009	Ammonifex degensii KC4	2077	0	0	1	2	2	1	0	0	0	0	5	0	1	0	0	0	0	1	0	1	0	0	0
UP000002625	331104	Blattabacterium sp. (Blattella germanica) str. Bge	590	0	0	0	1	0	0	0	0	0	0	0	0	0	0	0	0	0	1	1	0	0	0	0
UP000002629	509190	Caulobacter segnis ATCC 21756	4136	1	1	1	1	0	0	0	0	0	0	5	7	16	12	1	3	4	1	11	1	0	0	0
UP000002631	347256	Mycoplasma hominis ATCC 23114	529	0	0	0	0	0	0	0	0	0	0	0	0	0	0	0	0	0	0	0	1	0	0	0
UP000002648	1094560	Bartonella taylorii 8TBB	1705	1	0	1	1	0	0	0	0	0	0	0	0	2	0	0	0	1	1	1	0	0	0	0
UP000002663	945021	Tetragenococcus halophilus NBRC 12172	2507	0	0	0	1	0	0	1	0	0	0	1	1	4	1	0	2	0	1	2	2	0	0	0
UP000002671	227377	Coxiella burnetii RSA 493	1812	0	0	0	1	0	0	0	0	0	0	1	1	0	0	0	3	1	2	2	0	0	0	0
UP000002675	196600	Vibrio vulnificus YJ016	4990	1	1	2	3	1	0	1	1	0	0	5	0	2	4	1	0	1	1	10	4	0	0	0
UP000002676	257313	Bordetella pertussis Tohama I	3258	1	0	1	2	0	0	1	0	0	0	10	4	16	3	0	0	9	1	9	1	0	0	0
UP000002677	83406	gamma proteobacterium HdN1	3683	1	0	1	3	0	0	0	0	0	0	6	4	5	2	0	3	5	2	8	2	0	0	1
UP000002686	551947	Bradyrhizobium sp. STM 3843	8201	1	3	1	2	2	0	1	1	0	0	5	5	31	21	2	1	7	2	14	2	0	0	0
UP000002690	1202532	Flavobacterium sp. F52	4548	1	0	1	2	1	0	1	0	0	0	2	2	9	9	0	3	1	1	9	1	0	0	0
UP000002696	633149	Brevundimonas subvibrioides ATCC 15264	3326	1	1	1	3	0	0	0	0	0	0	4	3	9	4	0	1	2	1	10	1	0	0	0
UP000002697	264198	Ralstonia eutropha JMP134	6433	2	5	1	3	0	0	1	0	0	0	4	14	29	10	1	3	12	2	29	9	0	0	0
UP000002703	272943	Rhodobacter sphaeroides 2.4.1	4285	1	2	1	3	0	0	1	1	0	1	3	4	13	4	2	1	3	1	11	3	0	0	0
UP000002704	205922	Pseudomonas fluorescens Pf0-1	5712	1	1	2	4	1	0	1	0	0	1	6	3	12	13	0	1	4	2	25	2	0	0	0
UP000002706	246194	Carboxydothermus hydrogenoformans Z-2901	2615	0	0	1	2	0	0	0	0	0	0	5	4	0	0	0	0	0	1	1	4	2	0	0
UP000002707	314315	Lactobacillus sakei subsp. sakei 23K	1872	0	0	0	1	0	0	0	0	0	0	2	1	2	1	0	0	0	1	0	1	0	0	0
UP000002708	340177	Chlorobium chlorochromatii CaD3	1986	2	0	2	4	1	0	0	0	0	1	3	0	2	3	0	1	0	1	2	2	1	0	0
UP000002709	319225	Chlorobium luteolum DSM 273	2075	1	0	1	4	1	0	0	0	0	1	4	0	1	2	0	1	0	1	1	2	1	0	0
UP000002710	207559	Desulfovibrio alaskensis G20	3220	0	0	0	2	1	0	1	0	0	0	9	0	1	2	0	0	0	2	3	4	0	0	0
UP000002711	110662	Synechococcus sp. CC9605	2633	1	1	0	3	1	1	1	1	0	0	3	0	3	3	0	1	0	1	1	1	0	0	0
UP000002712	316279	Synechococcus sp. CC9902	2301	1	1	0	3	1	1	1	1	0	0	2	0	3	0	0	0	0	1	2	1	0	0	0
UP000002713	317025	Hydrogenovibrio crunogenus XCL-2	2187	1	1	1	3	1	1	1	0	0	0	1	0	2	1	0	0	0	1	2	1	0	0	0
UP000002714	326298	Sulfurimonas denitrificans DSM 1251	2084	1	1	1	3	0	0	0	0	0	0	1	0	3	0	0	0	0	1	2	0	0	0	0
UP000002716	300267	Shigella dysenteriae Sd197	3897	1	0	2	3	0	0	1	0	0	0	0	0	3	3	0	0	0	1	4	4	0	0	0
UP000002717	1140	Synechococcus elongatus PCC 7942	2657	1	0	0	5	1	1	1	0	0	0	3	0	3	8	0	1	0	1	1	2	0	0	0
UP000002718	323848	Nitrosospira multiformis ATCC 25196	2732	1	1	0	1	1	0	1	0	0	0	5	1	1	1	0	0	1	2	2	0	0	0	0
UP000002719	359391	Brucella abortus 2308	3023	1	1	1	0	0	0	0	0	0	0	2	4	9	2	0	0	3	1	13	0	0	0	0
UP000002724	324925	Pelodictyon phaeoclathratiforme BU-1	2685	1	0	1	5	1	0	0	0	0	1	3	0	4	1	0	3	0	1	2	3	1	0	0
UP000002725	290512	Prosthecochloris aestuarii DSM 271	2319	1	0	1	6	0	0	0	0	0	1	4	0	2	2	0	4	0	1	2	1	1	0	0
UP000002730	573061	Clostridium cellulovorans 743B	4211	1	0	1	4	2	1	1	0	0	0	2	2	3	0	0	0	0	3	2	3	0	0	0
UP000002734	579405	Dickeya paradisiaca Ech703	3961	1	0	2	1	1	0	1	0	0	0	3	2	8	4	0	0	0	3	5	5	0	0	0
UP000002741	573234	Candidatus Hodgkinia cicadicola Dsem	169	0	0	0	0	0	0	0	0	0	0	0	0	0	0	0	0	0	0	0	0	0	0	0
UP000002742	583345	Methylotenera mobilis JLW8	2334	1	2	1	2	1	0	1	0	0	0	3	0	3	2	0	0	1	1	0	0	0	0	0
UP000002743	582744	Methylovorus glucosetrophus SIP3-4	2907	1	0	1	2	1	0	1	0	0	1	5	0	5	4	0	0	0	1	1	0	0	0	0
UP000002745	582402	Hirschia baltica ATCC 49814	3187	1	1	0	3	0	0	1	0	0	0	3	3	7	3	1	5	4	1	11	1	0	0	0
UP000002747	553480	Photorhabdus asymbiotica subsp. asymbiotica ATCC 43949	4350	1	0	2	3	0	0	0	0	0	0	5	1	5	5	0	1	0	6	8	3	0	0	0
UP000002749	1032867	Pasteurella multocida subsp. multocida str. Anand1_cattle	3590	0	0	0	1	0	0	2	0	0	0	0	0	0	0	0	0	0	0	0	0	0	0	0
UP000002751	1032868	Pasteurella multocida subsp. multocida str. Anand1_buffalo	3217	0	0	0	0	0	0	3	0	0	0	0	0	0	0	0	0	0	1	1	1	0	0	0
UP000002754	1218173	Bacillus alcalophilus ATCC 27647 = CGMCC 1.3604	3743	0	0	0	2	0	0	0	0	0	0	1	3	4	0	0	2	0	1	6	5	0	0	0
UP000002759	598467	Brenneria sp. EniD312	4386	1	0	2	2	1	0	1	0	0	0	1	3	5	4	0	1	0	2	10	3	0	0	0
UP000002768	641149	Neisseria sp. oral taxon 014 str. F0314	2292	1	1	1	3	1	0	0	0	0	0	5	0	1	1	0	0	0	1	5	0	0	0	0
UP000002770	658187	Legionella drancourtii LLAP12	3959	2	0	0	4	0	0	0	0	0	0	2	3	8	2	3	1	3	3	7	1	0	0	0
UP000002772	688246	Prevotella multisaccharivorax DSM 17128	2694	0	0	0	1	1	0	1	0	0	0	3	0	1	0	0	1	1	1	0	0	0	0	0
UP000002774	714943	Mucilaginibacter paludis DSM 18603	6864	2	0	1	3	1	0	2	0	0	0	3	2	15	3	0	4	1	1	9	2	0	0	0
UP000002779	465543	Streptomyces sp. SPB074	5653	1	1	2	5	0	0	1	3	0	1	4	3	10	7	0	6	2	4	13	1	0	0	0
UP000002785	463191	Streptomyces sviceus ATCC 29083	8202	0	4	2	5	0	0	2	4	2	2	5	7	19	19	0	6	7	2	27	2	0	0	0
UP000002786	868129	Prevotella bivia DSM 20514	2064	0	0	0	1	1	0	1	0	0	0	3	0	1	0	0	0	1	1	0	0	0	0	0
UP000002793	247634	marine gamma proteobacterium HTCC2148	3825	1	0	1	4	0	0	0	0	0	0	1	7	14	3	0	7	4	1	19	6	1	0	1
UP000002801	552398	Ruminococcaceae bacterium D16	2987	1	0	0	2	1	0	1	0	0	0	1	1	4	0	0	0	0	1	1	1	0	0	0
UP000002805	457429	Streptomyces pristinaespiralis ATCC 25486	6866	1	1	2	8	0	0	1	3	1	1	7	5	12	10	0	2	7	3	18	2	0	0	1
UP000002817	675816	Vibrio orientalis CIP 102891 = ATCC 33934	4274	1	0	2	1	1	0	1	0	0	0	5	0	1	5	0	0	1	1	11	4	0	0	0
UP000002861	435590	Bacteroides vulgatus ATCC 8482	3982	2	0	2	4	1	0	1	0	0	0	7	0	2	0	0	1	1	1	2	2	0	0	0
UP000002868	1168287	Mycobacterium sp. MOTT36Y	5100	1	0	0	3	1	1	1	2	1	2	7	12	26	17	0	15	8	5	19	0	0	0	2
UP000002869	1163389	Francisella noatunensis subsp. orientalis str. Toba 04	1595	0	1	1	2	1	0	1	0	0	0	2	1	0	0	0	0	1	1	2	0	0	0	0
UP000002875	929562	Emticicia oligotrophica DSM 17448	4251	1	0	2	1	0	0	1	0	1	1	4	2	6	7	0	0	2	1	7	2	1	0	0
UP000002881	660470	Mesotoga prima MesG1.Ag.4.2	2499	0	0	0	4	1	1	0	1	0	0	2	0	1	2	0	0	1	1	2	3	0	0	0
UP000002892	646529	Desulfosporosinus acidiphilus SJ4	4469	0	0	0	3	2	0	2	0	0	0	4	9	2	0	0	2	2	1	2	2	2	0	0
UP000002895	768486	Enterococcus hirae ATCC 9790	2743	0	0	0	2	0	0	0	0	0	0	3	1	2	0	0	0	1	1	2	0	0	0	0
UP000002914	391619	Phaeobacter inhibens DSM 17395	3853	0	2	1	2	0	0	0	0	0	0	0	6	11	4	1	0	2	2	19	2	0	0	0
UP000002930	1187851	Rhodovulum sp. PH10	4490	1	1	1	1	1	0	1	1	0	0	4	1	10	6	1	2	6	1	5	0	0	0	0
UP000002931	314271	Maritimibacter alkaliphilus HTCC2654	4692	1	2	1	1	0	0	1	0	0	0	2	6	14	7	1	0	8	2	19	0	0	0	0
UP000002935	69042	Synechococcus sp. WH 5701	3316	1	3	0	3	1	1	1	1	0	0	3	0	4	2	0	0	0	1	1	1	0	0	0
UP000002938	702450	Turicibacter sanguinis PC909	2779	1	0	1	2	2	0	1	0	0	0	0	0	0	1	0	0	0	1	1	3	0	0	0
UP000002939	626369	Granulicatella elegans ATCC 700633	1562	0	0	0	1	1	0	1	0	0	0	2	0	0	1	0	0	0	1	1	3	0	0	0
UP000002941	1125718	Actinomyces massiliensis F0489	3129	1	1	1	2	0	0	1	1	2	1	5	0	5	1	0	1	0	1	3	1	0	0	0
UP000002943	796620	Vibrio caribbeanicus ATCC BAA-2122	4023	1	0	2	2	0	0	1	0	0	0	0	0	5	6	0	0	1	2	9	1	0	0	0
UP000002944	391589	Roseobacter sp. GAI101	4185	1	1	1	2	0	0	0	0	0	0	5	4	10	3	3	3	5	1	12	1	0	0	0
UP000002945	391587	Kordia algicida OT-1	4477	2	0	1	2	0	0	1	0	1	2	3	2	9	1	0	1	1	3	9	1	0	0	0
UP000002949	1082933	Mesorhizobium amorphae CCNWGS0123	7083	1	2	1	2	1	0	1	0	0	0	5	3	37	12	1	4	5	2	28	2	0	0	0
UP000002955	751586	Brevundimonas diminuta ATCC 11568	3002	1	1	1	2	0	0	0	0	0	0	3	5	6	4	1	1	5	1	6	0	0	0	0
UP000002956	327275	Shewanella sp. HN-41	4102	1	0	2	2	0	0	1	0	0	0	0	1	4	7	0	1	0	1	6	2	0	0	0
UP000002964	631362	Thiorhodovibrio sp. 970	4691	1	0	1	3	1	0	2	0	0	1	9	0	1	3	0	0	0	1	1	1	0	0	0
UP000002967	1124982	Treponema sp. JC4	2570	1	0	1	1	0	1	0	0	0	0	2	0	2	1	0	0	0	1	0	2	0	0	0
UP000002968	467200	Streptomyces griseoflavus Tu4000	6337	1	1	2	5	0	0	2	4	2	2	2	6	13	8	0	3	6	5	17	1	0	0	0
UP000002970	742740	Clostridium symbiosum WAL-14163	4668	1	0	1	4	1	0	2	0	0	0	2	2	5	2	0	0	1	1	2	4	1	0	0
UP000002975	469605	Fusobacterium gonidiaformans 3-1-5R	1890	0	0	1	2	1	0	1	0	0	0	0	0	0	1	0	0	0	1	0	0	2	0	0
UP000002985	247490	Candidatus Jettenia caeni	3545	0	0	0	7	1	1	1	0	0	1	8	0	2	0	0	0	0	1	2	0	0	0	0
UP000002995	237727	Erythrobacter sp. NAP1	3177	1	1	1	2	0	0	0	0	0	0	2	5	9	4	1	2	2	1	8	0	0	0	0
UP000003009	629741	Kingella oralis ATCC 51147	3160	1	1	1	3	0	0	0	0	0	0	0	0	2	0	0	0	0	1	3	0	0	0	0
UP000003011	679200	Johnsonella ignava ATCC 51276	2284	2	0	1	3	1	0	1	0	0	0	1	1	0	1	0	0	0	1	0	2	0	0	0
UP000003016	1095744	Haemophilus parahaemolyticus HK385	1980	0	0	1	1	1	0	1	0	0	0	1	0	1	1	0	0	0	1	3	1	0	0	0
UP000003019	1032488	Neisseria shayeganii 871	2530	1	1	1	2	0	0	0	0	0	0	0	2	2	2	0	0	1	1	7	1	0	0	0
UP000003022	996637	Streptomyces griseoaurantiacus M045	6839	1	0	1	3	0	0	2	1	2	2	6	4	14	9	0	5	8	5	22	2	0	0	1
UP000003023	888059	Capnocytophaga sp. oral taxon 338 str. F0234	2444	1	0	1	2	0	0	1	0	0	0	2	0	0	0	0	1	0	1	2	0	0	0	0
UP000003027	349967	Yersinia mollaretii ATCC 43969	4000	1	0	2	3	1	0	1	0	0	0	1	0	2	4	0	1	0	1	6	4	0	0	0
UP000003044	1002368	Yokenella regensburgei ATCC 43003	4709	1	1	2	2	1	0	1	0	0	0	2	1	5	5	0	0	1	1	12	3	0	0	0
UP000003045	871571	Mobiluncus mulieris ATCC 35239	2379	1	1	0	3	0	0	1	0	0	1	1	0	1	1	0	1	0	0	3	1	0	0	0
UP000003049	987057	Burkholderia sp. TJI49	8940	2	2	1	5	0	0	1	1	2	2	7	7	20	12	2	4	6	2	33	2	0	0	0
UP000003053	313594	Polaribacter irgensii 23-P	2556	0	2	1	2	1	0	1	0	0	0	1	2	1	2	0	0	0	1	5	1	0	0	0
UP000003056	443342	candidate division TM7 genomosp. GTL1	670	0	0	0	0	0	0	0	0	0	0	1	0	0	1	0	0	0	0	0	0	0	0	0
UP000003058	765914	Thiorhodospira sibirica ATCC 700588	2933	1	0	1	2	1	0	1	0	0	0	9	1	2	0	0	0	1	1	0	0	0	0	0
UP000003063	649743	Actinomyces sp. oral taxon 848 str. F0332	2591	0	0	1	2	0	0	1	0	1	1	1	0	1	2	0	0	1	0	1	2	0	0	0
UP000003070	908339	Lactobacillus oris PB013-T2-3	2038	1	0	2	2	0	0	0	0	0	0	2	1	5	2	0	0	0	1	3	0	0	0	0
UP000003081	632245	Clostridium butyricum E4 str. BoNT E BL5262	4245	1	0	1	5	1	0	2	0	0	0	3	1	3	2	0	0	0	2	2	11	0	1	0
UP000003082	553218	Campylobacter rectus RM3267	2971	1	1	1	1	0	0	0	0	0	0	1	0	1	0	0	0	0	1	2	1	0	0	0
UP000003087	344747	Gimesia maris DSM 8797	6463	1	1	0	3	0	0	1	0	0	0	7	1	16	2	0	0	0	1	7	1	0	0	0
UP000003089	997884	Bacteroides nordii CL02T12C05	4388	1	0	0	2	1	0	1	0	0	0	3	0	2	0	0	0	1	1	0	1	0	0	0
UP000003092	742814	Fusobacterium necrophorum subsp. funduliforme 1_1_36S	3196	0	0	1	1	1	0	3	0	0	0	0	0	0	0	0	0	2	1	0	1	1	0	0
UP000003107	553219	Campylobacter showae RM3277	2361	1	1	1	0	0	0	0	0	0	0	2	0	1	0	0	0	0	1	1	1	0	0	0
UP000003110	766499	Citreicella sp. 357	4573	1	2	1	1	0	0	1	0	0	0	5	6	13	0	2	1	7	2	13	0	0	0	0
UP000003111	585531	Aeromicrobium marinum DSM 15272	3077	1	2	2	2	0	0	0	0	0	0	2	7	7	7	0	3	5	0	9	0	0	0	2
UP000003112	873513	Prevotella buccae ATCC 33574	2896	0	0	0	2	1	0	1	0	0	0	2	0	1	0	0	1	1	1	0	1	0	0	0
UP000003118	767029	Pseudopropionibacterium propionicum F0230a	2931	1	1	1	2	0	0	1	1	1	1	2	0	2	3	0	0	1	3	3	1	0	0	0
UP000003140	936370	Capnocytophaga sp. CM59	2582	1	0	1	2	1	0	1	0	0	0	3	0	0	0	0	1	0	1	2	0	0	0	0
UP000003142	936375	Mogibacterium sp. CM50	1791	1	0	1	0	0	0	0	0	0	0	1	0	0	1	0	1	0	0	0	1	0	0	0
UP000003146	470145	Bacteroides coprocola DSM 17136	4095	2	0	1	1	1	0	1	0	0	0	2	0	3	0	0	0	1	1	0	0	0	0	0
UP000003148	709797	Bradyrhizobiaceae bacterium SG-6C	4236	1	1	1	1	0	0	0	0	0	0	3	6	16	10	1	1	7	1	9	3	0	0	0
UP000003157	469596	Coprobacillus sp. 29_1	3839	0	0	0	2	1	0	1	0	0	0	1	0	2	2	0	0	0	1	2	2	0	0	0
UP000003160	585502	Prevotella bergensis DSM 17361	2824	1	0	1	2	1	0	1	0	0	0	1	0	2	0	0	0	1	1	0	0	0	0	0
UP000003167	999422	Prevotella maculosa OT 289	2568	0	0	0	2	1	0	1	0	0	0	6	0	2	0	0	0	1	1	0	0	0	0	0
UP000003176	525310	Lactobacillus brevis subsp. gravesensis ATCC 27305	3039	1	0	3	1	0	0	0	0	0	0	1	1	7	3	0	1	0	1	5	4	0	0	0
UP000003178	500633	Clostridium hiranonis DSM 13275	2271	1	0	2	1	0	0	0	0	0	0	0	0	3	1	0	0	0	1	2	4	0	0	0
UP000003179	765109	Propionibacterium humerusii HL044PA1	2858	1	2	1	2	0	0	1	2	1	1	5	0	1	4	0	0	1	1	3	1	0	0	0
UP000003180	1165841	Sulfurovum sp. AR	2114	1	2	2	3	2	0	1	0	0	0	4	0	1	0	0	0	0	1	4	1	0	0	0
UP000003191	518634	Bifidobacterium breve DSM 20213 = JCM 1192	2262	1	1	1	2	0	0	1	0	0	1	2	0	2	0	0	0	0	0	2	0	0	0	0
UP000003195	706434	Megasphaera micronuciformis F0359	1771	1	0	2	2	0	0	0	0	0	0	0	1	1	0	0	0	0	1	1	1	0	0	0
UP000003226	1163407	Rhodanobacter spathiphylli B39	3438	2	1	1	2	0	0	0	1	0	0	2	1	9	6	0	0	0	1	5	0	0	0	0
UP000003240	1009370	Acetonema longum DSM 6540	4283	1	0	2	2	1	0	1	0	0	0	1	1	4	1	0	0	1	2	3	2	1	0	0
UP000003242	699218	Megasphaera genomosp. type_1 str. 28L	1610	1	0	3	1	0	0	0	0	0	0	0	1	1	0	0	0	1	1	2	5	2	0	0
UP000003244	596315	Peptostreptococcus stomatis DSM 17678	1600	0	0	0	1	1	0	1	0	0	0	0	0	0	1	0	0	0	1	0	2	0	0	0
UP000003246	665953	Bacteroides eggerthii 1_2_48FAA	3857	1	0	0	3	1	0	1	0	0	0	3	0	3	0	0	0	1	1	0	1	0	0	0
UP000003250	1107882	Mesorhizobium alhagi CCNWXJ12-2	7195	1	1	1	1	1	0	1	0	0	0	2	4	21	12	1	3	5	1	22	0	0	0	0
UP000003254	471875	Ruminococcus lactaris ATCC 29176	2706	2	0	0	1	1	0	1	0	0	0	1	0	1	0	0	0	0	1	2	1	0	0	0
UP000003255	422289	Beggiatoa sp. PS	6644	1	0	0	5	0	0	1	0	0	0	2	0	1	0	0	1	0	1	1	0	0	0	0
UP000003257	391624	Oceanibulbus indolifex HEL-45	4147	1	1	1	1	0	0	0	0	0	0	2	6	7	5	1	0	3	2	16	2	0	0	0
UP000003277	742743	Dialister succinatiphilus YIT 11850	2140	1	2	2	2	0	0	0	0	0	0	0	1	0	0	0	0	0	1	2	2	0	0	0
UP000003280	862517	Peptoniphilus duerdenii ATCC BAA-1640	1987	1	0	1	1	0	0	0	0	0	0	0	1	1	2	0	0	1	0	1	0	0	0	0
UP000003283	665959	Bacillus sp. 2_A_57_CT2	5748	0	0	0	1	1	0	1	0	0	1	6	6	13	4	0	0	2	2	14	2	0	0	0
UP000003291	871237	Streptococcus infantis SK1302	2102	0	0	0	1	0	0	2	0	0	0	1	0	1	1	0	0	0	1	0	1	0	0	0
UP000003292	1054213	Acetobacteraceae bacterium AT-5844	5288	1	0	1	2	1	0	1	0	0	1	6	1	19	4	1	0	5	1	9	4	0	0	0
UP000003295	521003	Collinsella intestinalis DSM 13280	1783	1	0	1	2	1	0	1	0	0	0	0	0	0	0	0	0	0	0	1	0	0	0	0
UP000003327	649761	Prevotella veroralis F0319	3037	0	0	0	1	1	0	1	0	0	0	2	0	0	0	0	0	1	1	0	0	0	0	0
UP000003330	764299	Streptococcus ictaluri 707-05	2397	0	0	0	3	1	0	1	2	0	0	2	2	2	0	0	0	0	1	2	0	0	0	0
UP000003336	658086	Lachnospiraceae bacterium 3_1_57FAA_CT1	6505	1	0	1	5	1	0	2	0	0	0	7	2	4	1	0	0	0	1	3	6	0	0	0
UP000003340	537013	Clostridium methylpentosum DSM 5476	3907	1	0	1	3	1	0	1	0	0	0	2	0	0	0	0	1	0	1	2	7	0	0	0
UP000003344	546266	Neisseria mucosa ATCC 25996	3109	1	1	1	2	0	0	0	0	0	0	2	0	1	1	0	0	0	1	6	0	0	0	0
UP000003359	406819	Burkholderia sp. SJ98	7251	1	4	1	2	2	0	1	1	0	0	11	8	25	20	1	2	11	2	35	6	0	0	0
UP000003374	314278	Nitrococcus mobilis Nb-231	3484	1	0	1	3	0	0	1	0	0	1	7	3	4	2	1	2	0	1	5	1	0	0	0
UP000003380	457415	Synergistes sp. 3_1_syn1	2957	1	0	2	5	1	0	1	0	0	0	2	0	7	0	0	2	0	2	2	6	0	0	0
UP000003389	888051	Actinomyces sp. oral taxon 178 str. F0338	2524	0	0	1	3	0	0	1	0	0	1	4	0	0	2	0	0	1	0	1	1	0	0	0
UP000003395	1134474	Cellvibrio sp. BR	4304	1	0	1	4	1	0	1	0	0	0	5	0	3	4	0	3	1	1	3	1	0	0	0
UP000003408	745014	gamma proteobacterium HIMB55	2470	1	0	1	2	0	0	0	0	0	0	2	8	11	5	0	4	4	1	8	2	0	0	0
UP000003415	469616	Fusobacterium mortiferum ATCC 9817	2532	1	0	2	2	1	0	1	0	0	0	2	1	0	0	0	0	1	1	1	7	0	0	0
UP000003416	763034	Bacteroides fluxus YIT 12057	3920	1	0	0	2	1	0	1	0	0	0	5	0	2	0	0	0	2	1	0	1	0	0	0
UP000003417	331869	alpha proteobacterium BAL199	5881	1	1	1	2	0	0	0	0	0	0	3	3	32	6	1	1	5	2	8	2	0	0	0
UP000003422	997350	Peptoniphilus indolicus ATCC 29427	2269	0	0	0	1	0	0	0	0	0	0	1	1	0	2	0	0	1	1	2	4	1	0	0
UP000003438	411471	Subdoligranulum variabile DSM 15176	3378	1	0	0	3	2	0	2	0	0	0	3	0	1	0	0	0	1	1	1	2	0	0	0
UP000003445	944559	Paenibacillus sp. HGF7	5992	1	0	0	4	1	0	1	0	0	0	5	2	15	3	0	0	0	3	7	1	0	0	0
UP000003446	661087	Olsenella sp. oral taxon 809 str. F0356	1898	0	0	1	2	1	0	1	0	0	0	0	1	1	1	0	0	0	1	1	6	0	0	0
UP000003448	1150864	Micromonospora lupini str. Lupac 08	6991	1	1	1	2	2	0	1	2	0	1	8	5	11	10	0	4	6	3	11	1	0	0	0
UP000003460	626522	Alloprevotella tannerae ATCC 51259	2806	0	0	0	1	1	0	1	0	0	0	3	0	0	0	0	0	1	1	0	2	0	0	0
UP000003473	1168065	gamma proteobacterium BDW918	3794	1	0	2	4	0	0	0	0	0	0	2	10	16	5	0	5	5	1	10	4	0	0	1
UP000003479	1097676	Pseudoalteromonas sp. BSi20429	4030	0	0	1	2	0	0	1	0	0	0	1	1	2	4	0	2	0	1	8	1	0	0	0
UP000003485	512030	Acidovorax sp. NO-1	4677	1	2	1	4	0	0	0	0	0	0	4	7	10	8	2	1	6	1	9	2	0	0	0
UP000003494	626523	Shuttleworthia satelles DSM 14600	2247	0	0	0	1	0	0	1	0	0	0	0	1	2	2	0	0	0	1	1	2	0	0	0
UP000003503	888062	Dialister micraerophilus DSM 19965	1242	1	0	3	1	0	0	0	0	0	0	0	1	1	0	0	0	0	1	1	1	0	0	0
UP000003511	1055526	Candidatus Paraburkholderia kirkii UZHbot1	2015	0	0	0	2	0	0	0	0	0	1	1	2	5	2	1	1	1	1	4	0	0	0	0
UP000003512	307502	Wolbachia endosymbiont of Drosophila ananassae	1722	0	0	0	0	0	0	0	0	0	0	0	0	1	0	0	0	0	1	0	0	0	0	0
UP000003516	679198	Aggregatibacter aphrophilus F0387	2104	0	0	1	1	1	0	1	0	0	0	0	0	1	3	0	0	0	1	2	0	0	0	0
UP000003533	422288	Beggiatoa sp. SS	1437	0	0	0	0	0	0	1	2	0	0	0	0	1	0	0	0	0	1	0	0	0	0	0
UP000003535	391593	Roseobacter sp. CCS2	3660	1	2	1	0	0	0	1	0	0	0	3	4	8	4	1	1	1	1	6	0	0	0	0
UP000003544	1026882	Methylophaga aminisulfidivorans MP	3174	1	0	1	3	1	0	1	0	0	0	3	0	3	2	0	0	1	1	3	1	0	0	0
UP000003560	445975	Collinsella stercoris DSM 13279	2527	1	0	1	3	1	0	1	0	0	0	0	0	2	0	0	0	0	0	1	1	0	0	0
UP000003565	879309	Veillonella sp. oral taxon 158 str. F0412	1993	1	0	3	1	0	0	0	0	0	0	0	1	1	1	0	0	0	1	1	5	0	0	0
UP000003571	907348	Treponema saccharophilum DSM 2985	2828	1	0	1	1	0	1	0	0	0	0	1	0	2	0	0	0	0	1	1	2	0	0	0
UP000003573	764298	Streptococcus macacae NCTC 11558	1868	0	0	0	3	1	0	1	0	0	0	1	0	6	0	0	0	0	2	3	0	0	0	0
UP000003579	675817	Photobacterium damselae subsp. damselae CIP 102761	3498	1	0	2	1	1	0	1	0	0	0	4	1	2	6	1	1	1	1	4	4	0	0	1
UP000003584	1150591	Mycobacterium xenopi RIVM700367	4272	1	1	0	3	1	1	1	1	1	2	7	8	12	12	0	5	7	3	12	0	0	0	2
UP000003586	929713	Niabella soli DSM 19437	4110	2	0	1	4	1	0	1	0	0	0	2	2	7	1	0	1	1	2	4	1	0	0	0
UP000003599	883103	Dolosigranulum pigrum ATCC 51524	1691	0	0	0	1	1	0	1	0	0	0	2	1	1	0	0	0	0	1	3	2	0	0	0
UP000003604	675812	Grimontia hollisae CIP 101886	3553	1	0	2	1	0	0	0	0	0	0	0	0	2	4	1	0	0	1	9	1	0	0	0
UP000003610	866771	Prevotella disiens FB035-09AN	2556	1	0	1	2	1	0	1	0	0	0	2	0	0	0	0	0	1	1	0	0	0	0	0
UP000003612	435832	Neisseria mucosa C102	2026	1	1	1	2	0	0	0	0	0	0	2	0	1	1	0	0	0	1	5	0	0	0	0
UP000003620	658088	Lachnospiraceae bacterium 9_1_43BFAA	2717	2	0	1	1	1	0	1	0	0	0	2	0	1	0	0	0	0	1	2	0	0	0	0
UP000003622	553178	Capnocytophaga gingivalis ATCC 33624	2587	1	0	1	1	1	0	1	0	0	0	2	0	1	0	0	1	0	1	2	0	0	0	0
UP000003627	701176	Vibrio sp. N418	4028	0	0	2	3	1	0	1	0	0	0	4	0	0	7	1	1	2	1	7	5	0	0	0
UP000003630	391603	Flavobacteriales bacterium ALC-1	3427	1	0	1	3	0	0	0	0	0	0	6	2	3	1	0	0	1	2	6	1	1	0	0
UP000003631	487797	Flavobacteria bacterium MS024-3C	1382	1	0	0	1	0	0	0	0	0	1	1	1	1	2	0	1	0	0	4	0	0	0	0
UP000003635	314256	Oceanicola granulosus HTCC2516	3791	1	1	2	1	1	0	1	1	0	1	3	4	17	3	1	1	1	1	9	2	0	0	0
UP000003637	947828	Lactobacillus rhamnosus MTCC 5462	3249	0	0	0	1	0	0	2	2	0	0	0	0	2	1	0	0	0	1	2	2	0	0	0
UP000003638	1120227	Streptomyces coelicoflavus ZG0656	8699	1	0	2	7	0	0	2	5	3	3	5	5	14	10	0	4	5	3	17	1	0	0	0
UP000003639	411467	Pseudoflavonifractor capillosus ATCC 29799	4804	1	0	1	1	2	0	1	0	0	0	3	0	0	0	0	0	0	1	3	5	0	0	0
UP000003644	487796	Flavobacteria bacterium MS024-2A	1770	1	0	1	2	0	0	0	0	0	0	1	1	7	1	0	0	1	1	4	1	0	0	0
UP000003645	1130798	Lactobacillus mucosae LM1	1970	1	1	2	2	0	0	1	0	0	0	1	1	3	2	0	0	0	1	2	2	0	0	0
UP000003649	1048830	Mycoplasma iowae 695	981	0	0	0	1	0	0	0	0	0	0	0	0	0	1	0	0	1	0	3	1	0	0	0
UP000003656	561180	Bifidobacterium gallicum DSM 20093 = LMG 11596	1917	1	1	1	2	0	0	1	0	0	0	4	0	0	0	0	0	0	0	3	1	0	0	0
UP000003659	50743	unidentified eubacterium SCB49	2926	2	0	1	2	0	0	0	0	0	0	5	2	4	2	0	0	1	2	7	2	0	0	0
UP000003664	391596	Pedobacter sp. BAL39	5097	2	0	2	2	1	0	1	0	0	0	6	2	10	5	0	2	1	2	5	1	1	0	0
UP000003671	500635	Mitsuokella multacida DSM 20544	2558	1	0	3	2	1	0	1	0	0	0	0	1	5	0	0	0	0	1	3	3	0	0	0
UP000003676	411464	Desulfovibrio piger ATCC 29098	3106	1	0	0	2	0	0	0	0	0	0	2	0	1	1	0	0	0	3	0	1	0	0	0
UP000003680	879308	Peptoniphilus sp. oral taxon 375 str. F0436	2117	1	0	1	1	0	0	0	0	0	0	1	1	1	1	0	0	1	0	2	0	0	0	0
UP000003688	320771	Pedosphaera parvula Ellin514	6492	1	1	0	6	0	1	1	0	0	0	6	1	12	7	0	3	0	6	5	1	0	0	0
UP000003701	585503	Selenomonas noxia ATCC 43541	2020	0	0	1	4	1	0	1	0	0	0	0	0	1	0	0	0	0	1	1	1	1	0	0
UP000003704	1172194	Hydrocarboniphaga effusa AP103	4474	0	1	0	3	1	0	2	0	0	0	5	7	16	10	1	2	4	4	16	0	0	0	2
UP000003705	908338	Peptoniphilus harei ACS-146-V-Sch2b	1724	1	0	1	1	0	0	0	0	0	0	2	1	1	2	0	0	1	1	3	2	0	0	0
UP000003730	1046627	Bizionia argentinensis JUB59	3095	1	0	1	2	0	0	0	0	0	0	4	2	3	2	0	1	0	1	6	2	1	0	0
UP000003744	525255	Anaerococcus tetradius ATCC 35098	2079	1	0	1	1	1	0	3	0	0	0	1	1	0	0	0	0	0	0	1	2	0	0	0
UP000003746	1144253	Pontibacter sp. BAB1700	4044	3	0	1	4	0	0	1	1	0	2	4	2	7	9	0	0	1	1	6	0	0	0	0
UP000003764	655812	Aerococcus viridans ATCC 11563 = CCUG 4311	1929	1	0	0	2	0	0	1	0	0	0	2	3	4	0	0	1	0	1	2	3	0	0	0
UP000003769	391591	Vibrio shilonii AK1	5300	1	0	2	2	1	0	1	0	0	0	3	0	1	7	1	1	2	0	16	9	0	0	0
UP000003779	1205910	Nocardiopsis alba ATCC BAA-2165	5500	1	0	0	5	0	0	1	0	1	1	3	3	14	13	0	1	2	5	9	3	0	0	0
UP000003781	391612	Cyanothece sp. CCY0110	6411	1	0	0	5	3	1	2	0	0	0	7	0	6	2	0	2	0	6	5	1	0	0	0
UP000003784	391598	Flavobacteria bacterium BAL38	2588	1	0	1	2	0	0	0	0	0	0	3	2	0	0	0	0	0	1	2	1	1	0	0
UP000003793	470146	Coprococcus comes ATCC 27758	3907	4	0	0	1	1	0	2	2	0	0	3	2	1	1	0	0	0	1	2	5	0	0	0
UP000003803	445972	Anaerotruncus colihominis DSM 17241	4421	1	0	0	6	1	0	1	0	0	0	1	1	1	1	0	0	0	1	0	5	0	0	0
UP000003805	563008	Prevotella oris C735	2641	0	0	0	2	1	0	1	0	0	0	4	0	3	0	0	1	1	1	0	0	0	0	0
UP000003806	885272	Jonquetella anthropi DSM 22815	1508	0	0	1	1	0	0	0	0	0	0	1	1	0	0	0	0	0	1	0	2	0	0	0
UP000003813	794903	Opitutaceae bacterium TAV5	6011	1	0	1	1	1	0	1	0	0	0	7	0	8	1	0	0	0	1	2	1	0	0	0
UP000003821	655811	Anaerococcus vaginalis ATCC 51170	1764	0	0	0	1	1	0	2	0	0	0	2	1	0	0	0	0	0	0	2	3	0	0	0
UP000003822	435830	Actinomyces graevenitzii C83	1852	1	0	1	3	0	0	1	0	1	1	9	0	0	1	0	0	0	0	0	0	0	0	0
UP000003824	566461	Streptomyces viridosporus ATCC 14672	7865	1	1	1	5	0	0	2	5	3	2	5	7	20	14	0	2	7	8	21	1	0	0	0
UP000003828	1077972	Arthrobacter globiformis NBRC 12137	4524	1	1	1	1	0	0	0	2	0	1	3	3	8	5	0	2	6	1	24	0	0	0	0
UP000003829	575615	Prevotella sp. oral taxon 317 str. F0108	2926	0	0	0	1	1	0	1	0	0	0	2	0	0	0	0	0	1	1	0	0	0	0	0
UP000003834	88274	delta proteobacterium NaphS2	6687	0	0	0	3	1	0	2	0	0	0	6	6	8	4	0	1	3	1	4	2	3	0	1
UP000003835	118168	Coleofasciculus chthonoplastes PCC 7420	8193	1	1	0	5	0	1	2	0	0	1	7	0	6	8	0	2	0	2	3	1	0	0	0
UP000003839	382464	Verrucomicrobiae bacterium DG1235	4883	0	2	1	5	1	0	1	0	0	0	5	1	1	3	0	0	0	1	3	1	0	0	0
UP000003843	546265	Neisseria lactamica ATCC 23970	2707	1	1	1	1	0	0	0	0	0	0	1	0	1	1	0	0	0	1	4	0	0	0	0
UP000003844	865937	Gillisia limnaea DSM 15749	3411	1	0	1	3	0	0	1	0	0	1	9	2	1	3	0	2	0	1	7	0	1	0	0
UP000003855	665956	Subdoligranulum sp. 4_3_54A2FAA	4088	1	0	0	3	1	0	2	0	0	0	3	0	3	0	0	2	1	0	2	2	0	0	0
UP000003856	573060	Acidovorax delafieldii 2AN	4890	1	2	1	5	0	0	0	0	0	0	5	8	18	5	2	3	4	1	12	2	0	0	0
UP000003868	312284	marine actinobacterium PHSC20C1	2668	1	2	1	2	0	0	0	0	0	0	1	2	4	1	0	0	4	1	12	0	0	0	0
UP000003891	743719	Paenibacillus lactis 154	6136	0	0	0	4	1	0	1	0	0	0	3	1	16	1	0	1	0	1	5	2	0	0	0
UP000003899	663952	Streptococcus dysgalactiae subsp. dysgalactiae ATCC 27957	2071	0	0	0	2	1	0	1	0	0	0	1	2	2	0	0	0	0	1	3	1	0	0	0
UP000003900	1131935	Paenibacillus dendritiformis C454	5660	0	0	0	6	0	0	0	0	0	0	4	2	9	5	0	0	0	7	9	4	0	0	0
UP000003904	744979	Ahrensia sp. R2A130	3622	1	1	1	3	1	0	1	0	0	0	1	3	12	6	1	3	3	1	6	3	0	0	0
UP000003908	861452	Fusobacterium sp. oral taxon 370 str. F0437	2274	0	0	1	1	1	0	1	0	0	0	0	0	0	0	0	0	0	1	1	1	0	0	0
UP000003919	388413	Algoriphagus machipongonensis	3932	1	0	2	1	1	0	1	0	0	0	7	2	8	2	0	0	1	1	5	0	1	0	0
UP000003922	165597	Crocosphaera watsonii WH 8501	5659	1	2	0	4	2	1	2	0	0	0	2	0	3	5	0	1	0	4	4	2	0	0	0
UP000003936	1199245	secondary endosymbiont of Ctenarytaina eucalypti	918	1	0	1	1	0	0	0	0	0	0	2	0	0	0	0	1	0	1	0	1	0	0	0
UP000003937	134287	secondary endosymbiont of Heteropsylla cubana	576	0	0	0	0	0	0	0	0	0	0	1	0	1	0	0	0	0	1	0	0	0	0	0
UP000003947	864069	Microvirga lotononidis	6918	1	2	1	2	2	0	1	0	0	0	3	3	21	9	2	1	2	1	15	2	0	0	0
UP000003950	180281	Cyanobium sp. PCC 7001	2762	1	1	0	4	1	1	1	1	0	0	1	0	2	1	0	0	0	1	1	1	0	0	0
UP000003955	355249	Streptomyces sp. Tu6071	6635	1	1	2	5	0	0	1	2	1	1	5	4	16	9	0	7	3	2	15	1	0	0	0
UP000003959	489825	Moorea producens 3L	7382	1	1	0	6	1	1	1	0	0	0	13	0	9	7	0	3	0	4	6	1	0	0	0
UP000003963	457427	Streptomyces himastatinicus ATCC 53653	9177	1	1	1	4	0	0	1	2	1	1	6	9	48	13	0	5	4	34	25	2	0	0	0
UP000003964	469621	Fusobacterium periodonticum 1_1_41FAA	2325	0	0	1	1	1	0	1	0	0	0	0	0	0	0	0	0	0	1	1	3	1	0	0
UP000003970	591158	Streptomyces sp. AA4	8394	1	2	1	3	1	1	1	1	1	1	9	6	17	27	0	9	9	4	31	2	0	0	2
UP000003973	556268	Oxalobacter formigenes HOxBLS	2258	1	0	1	1	1	0	1	0	0	0	0	0	0	0	0	1	0	2	2	1	0	0	0
UP000003978	556261	Clostridium sp. D5	4496	1	0	0	4	1	0	1	0	0	0	2	3	5	2	0	2	1	1	8	10	0	0	0
UP000003981	621372	Paenibacillus sp. oral taxon 786 str. D14	4460	0	0	0	3	1	0	1	0	0	0	3	1	9	1	0	0	0	1	6	2	0	0	0
UP000003987	575594	Lactobacillus coleohominis 101-4-CHN	1652	1	0	2	1	0	0	0	0	0	0	2	1	3	2	0	0	0	0	2	0	0	0	0
UP000003994	883077	Actinomyces turicensis ACS-279-V-Col4	1709	1	0	1	2	0	0	1	1	1	1	2	0	0	1	0	0	0	0	2	2	0	0	0
UP000003996	1231626	Cardinium endosymbiont cEper1 of Encarsia pergandiella	887	0	0	1	0	0	0	0	0	0	0	0	0	0	0	0	0	0	1	0	0	0	0	0
UP000004001	679189	Prevotella timonensis CRIS 5C-B1	2202	0	0	0	2	1	0	1	0	0	0	2	0	1	0	0	1	1	1	0	0	0	0	0
UP000004030	1088721	Novosphingobium pentaromativorans US6-1	5229	1	2	1	4	0	0	1	0	0	0	6	6	31	7	2	3	8	1	26	1	2	0	0
UP000004041	666684	Afipia sp. 1NLS2	3823	1	0	1	1	0	0	1	0	0	1	4	2	8	6	2	0	1	1	6	1	0	0	0
UP000004046	997346	Desmospora sp. 8437	4048	0	0	0	1	0	0	0	0	0	0	2	4	4	2	0	1	0	2	5	4	0	0	0
UP000004057	570509	Spiroplasma melliferum KC3	1154	0	0	0	0	0	0	0	0	0	0	0	0	0	1	0	0	0	0	1	0	0	0	0
UP000004069	585524	Lactobacillus amylolyticus DSM 11664	1684	2	0	1	1	0	0	0	0	0	0	3	1	1	2	0	0	0	1	1	0	0	0	0
UP000004070	553184	Atopobium rimae ATCC 49626	1548	0	0	0	2	1	0	1	0	0	0	0	0	0	0	0	0	0	0	1	3	0	0	0
UP000004073	1105031	Clostridium sp. MSTE9	3478	1	1	1	3	1	0	1	0	0	0	3	3	1	2	0	0	1	1	6	6	1	0	0
UP000004080	1196324	Fictibacillus macauensis ZFHKF-1	3850	0	0	0	3	0	0	0	0	0	0	6	4	6	1	0	3	0	1	9	0	0	0	0
UP000004083	1002805	Helicobacter bizzozeronii CCUG 35545	2512	2	0	1	0	0	0	0	0	0	0	1	0	2	0	0	0	1	0	1	0	0	0	0
UP000004088	888741	Kingella denitrificans ATCC 33394	2517	1	1	1	2	0	0	0	0	0	0	0	0	1	1	0	0	0	1	4	1	0	0	0
UP000004095	313606	Microscilla marina ATCC 23134	8248	1	1	1	3	0	0	0	0	0	0	5	2	8	8	0	3	3	1	9	1	1	0	0
UP000004097	706433	Solobacterium moorei F0204	2034	0	0	1	1	1	0	1	0	0	0	1	0	1	0	0	0	0	0	1	2	0	0	0
UP000004105	888742	Neisseria bacilliformis ATCC BAA-1200	2966	1	2	1	2	0	0	0	0	0	0	2	0	2	1	0	1	0	1	5	0	0	0	0
UP000004115	525328	Lactobacillus iners DSM 13335	1214	0	0	0	1	0	0	0	0	0	0	2	1	0	1	0	0	0	0	0	0	0	0	0
UP000004116	1005043	Candidatus Regiella insecticola 5.15	2269	1	0	1	2	0	0	0	0	0	0	0	0	1	1	0	0	0	1	1	0	0	0	0
UP000004119	351016	Roseobacter sp. AzwK-3b	4072	1	2	1	4	0	0	0	0	0	0	2	4	10	3	1	0	1	1	11	3	0	0	0
UP000004121	585501	Oribacterium sinus F0268	2638	1	0	0	3	0	0	1	0	0	0	1	0	1	0	0	0	0	1	1	3	0	0	0
UP000004123	997353	Prevotella pallens ATCC 700821	2859	0	0	0	2	1	0	1	0	0	0	1	0	0	0	0	0	1	1	0	0	0	0	0
UP000004137	1000569	Megasphaera sp. UPII 135-E	1512	1	0	2	1	0	0	0	0	0	0	0	1	0	0	0	0	0	1	2	3	1	0	0
UP000004150	1042404	Streptococcus thermophilus CNCM I-1630	1889	0	0	0	2	0	0	0	1	0	0	1	0	0	0	0	0	0	0	1	0	0	0	0
UP000004156	1125723	Porphyromonas sp. oral taxon 279 str. F0450	1729	1	0	1	1	1	0	1	0	0	0	3	0	1	0	0	0	0	1	0	1	1	0	0
UP000004157	754027	Treponema phagedenis F0421	3146	1	0	0	1	2	1	0	0	0	0	1	0	1	0	0	0	0	0	2	3	0	0	0
UP000004162	377431	Chlorobium ferrooxidans DSM 13031	2158	2	0	1	5	1	0	0	0	0	1	4	0	3	4	0	2	0	1	2	2	1	0	0
UP000004165	910954	Dietzia cinnamea P4	3537	1	2	0	2	0	0	1	2	1	1	5	5	9	8	0	0	6	1	7	0	0	0	1
UP000004169	1150626	Phaeospirillum molischianum DSM 120	3771	2	0	1	2	0	0	1	0	0	0	6	3	3	3	0	1	2	3	2	1	0	0	0
UP000004184	591159	Streptomyces viridochromogenes DSM 40736	7706	1	2	1	4	0	0	2	4	2	2	8	7	14	11	0	4	5	11	23	3	0	0	1
UP000004188	314607	beta proteobacterium KB13	1317	0	1	1	3	0	0	0	0	0	0	1	0	1	0	0	1	0	1	0	0	0	0	0
UP000004191	883114	Helcococcus kunzii ATCC 51366	1876	1	0	1	1	1	0	2	0	0	0	0	0	0	0	0	0	0	0	2	2	0	0	0
UP000004198	536227	Clostridium carboxidivorans P7	5458	0	0	0	3	2	0	1	0	0	0	2	2	1	1	0	0	1	2	3	5	1	0	0
UP000004200	765913	Thiorhodococcus drewsii AZ1	4731	1	1	1	2	3	0	1	0	0	1	8	2	4	4	0	0	1	2	4	2	0	0	0
UP000004207	887327	Kingella kingae ATCC 23330	2102	1	1	1	3	0	0	0	0	0	0	0	0	1	1	0	0	0	1	1	0	0	0	0
UP000004208	585529	Corynebacterium genitalium ATCC 33030	2216	0	3	2	3	0	0	1	1	1	1	7	1	2	2	0	0	1	0	6	1	0	0	0
UP000004210	1163408	Rhodanobacter fulvus Jip2	3400	2	0	1	2	0	0	0	0	0	0	5	1	7	4	0	0	0	2	6	0	0	0	0
UP000004217	700597	Streptomyces zinciresistens K42	7577	1	1	2	6	0	0	2	5	2	5	9	6	12	9	0	3	5	7	19	2	0	0	1
UP000004218	553207	Corynebacterium matruchotii ATCC 14266	2619	0	2	2	2	0	0	1	0	1	1	4	0	3	3	0	0	0	0	4	0	0	0	0
UP000004221	1129897	Nitrolancea hollandica Lb	3969	0	0	0	3	0	0	1	0	0	1	12	0	4	2	0	0	0	1	1	0	0	0	0
UP000004226	596323	Leptotrichia goodfellowii F0264	2374	0	0	0	2	1	1	0	0	0	0	1	0	1	0	0	1	0	1	2	2	0	0	0
UP000004245	525370	Rhodococcus hoagii ATCC 33707	5029	1	1	0	4	1	1	1	1	0	1	3	12	21	18	0	4	9	1	16	0	0	0	3
UP000004259	246199	Ruminococcus albus 8	3826	1	0	0	2	2	0	2	0	0	0	0	0	2	0	0	0	0	1	2	3	0	0	0
UP000004261	909943	SAR116 cluster alpha proteobacterium HIMB100	2334	0	0	0	3	0	0	0	0	0	0	2	2	13	1	0	0	0	1	7	1	0	0	0
UP000004263	207949	Bermanella marisrubri	3303	1	0	1	2	0	0	0	0	0	0	0	4	3	4	0	2	1	2	10	0	0	0	0
UP000004277	795666	Ralstonia sp. PBA	3512	1	1	1	2	0	0	1	0	0	1	4	7	10	2	1	1	3	2	9	1	0	0	0
UP000004281	944560	Actinomyces sp. oral taxon 175 str. F0384	2638	1	1	1	3	0	0	1	1	1	1	7	0	0	2	0	0	0	0	4	0	0	0	0
UP000004282	506534	Rheinheimera sp. A13L	3941	1	0	2	4	1	0	1	0	0	0	0	2	4	6	0	0	0	1	7	1	2	0	0
UP000004291	411684	Hoeflea phototrophica DFL-43	4185	1	2	1	2	0	0	1	0	0	0	2	3	13	7	0	3	5	1	13	2	0	0	0
UP000004295	553175	Porphyromonas endodontalis ATCC 35406	1965	0	0	0	1	0	0	0	0	0	0	1	0	0	0	0	0	0	1	2	2	1	0	0
UP000004310	314231	Fulvimarina pelagi HTCC2506	3739	1	0	1	1	1	0	1	0	0	1	2	1	9	5	1	1	3	1	5	2	0	0	0
UP000004315	518637	Holdemanella biformis DSM 3989	2528	0	0	0	4	1	0	1	0	0	0	1	1	0	1	0	0	0	0	1	4	0	0	0
UP000004318	252305	Pseudooceanicola batsensis HTCC2597	4193	1	2	1	1	0	0	0	0	0	0	0	5	15	10	1	1	9	1	13	2	0	0	0
UP000004319	749388	Acetobacter tropicalis NBRC 101654	3538	1	1	1	3	1	0	1	0	0	0	3	0	6	3	0	3	1	1	14	0	0	0	0
UP000004322	873449	Streptococcus criceti HS-6	2261	0	0	0	3	0	0	1	0	0	0	1	0	2	2	0	0	0	1	2	2	0	0	0
UP000004324	1149862	Pelosinus fermentans B4	4690	1	0	1	3	1	0	1	0	0	0	2	4	8	1	0	0	1	4	5	5	1	0	0
UP000004339	1179778	Pseudomonas sp. M47T1	5675	1	1	1	3	1	0	1	0	0	1	5	4	15	9	0	2	5	2	26	4	0	0	0
UP000004344	741277	Fischerella sp. JSC-11	4557	2	0	0	6	2	1	1	0	0	0	13	1	5	5	0	1	0	6	5	1	0	0	0
UP000004358	314230	Blastopirellula marina DSM 3645	6010	1	2	0	3	1	0	2	0	0	0	9	1	13	1	0	0	0	2	7	1	0	0	0
UP000004367	1089455	Mobilicoccus pelagius NBRC 104925	3112	1	3	1	3	0	0	0	2	0	1	4	3	2	3	0	0	1	1	6	0	1	0	0
UP000004371	945543	Vibrio brasiliensis LMG 20546	4333	1	1	2	1	1	0	1	0	0	0	3	0	0	6	1	0	1	1	11	4	0	0	0
UP000004374	562729	Rheinheimera nanhaiensis E407-8	3730	1	0	2	3	1	0	1	0	0	0	2	3	2	5	0	0	0	1	5	1	1	0	0
UP000004394	862515	Prevotella marshii DSM 16973 = JCM 13450	2334	0	0	0	2	1	0	1	0	0	0	2	0	1	0	0	1	2	1	0	0	0	0	0
UP000004399	1111137	Slackia sp. CM382	1809	1	1	1	1	0	0	0	0	0	0	0	0	0	1	0	0	1	1	1	2	0	0	0
UP000004402	473781	Sphingomonas sp. LH128	6177	1	1	0	2	0	0	2	0	0	0	11	7	28	5	1	8	3	1	14	0	0	0	0
UP000004404	762963	Actinomyces sp. oral taxon 170 str. F0386	3042	1	1	1	3	0	0	1	1	1	1	5	0	2	2	0	0	0	0	5	1	0	0	0
UP000004417	161544	Bacillus sp. SG-1	4305	1	1	1	2	2	0	2	1	0	0	4	5	5	4	0	1	0	1	6	1	0	0	0
UP000004421	1095752	Prevotella sp. oral taxon 306 str. F0472	2432	0	0	0	1	1	0	1	0	0	0	2	0	0	0	0	0	1	1	0	0	0	0	0
UP000004423	482234	Streptococcus canis FSL Z3-227	2196	0	0	0	3	1	0	1	0	0	0	1	2	1	0	0	0	0	1	4	1	0	0	0
UP000004431	866774	Atopobium vaginae PB189-T1-4	1217	0	0	0	1	1	0	1	0	0	0	0	0	1	1	0	0	0	0	2	0	0	0	0
UP000004459	411475	Flavonifractor plautii ATCC 29863	4278	0	0	0	1	1	0	1	0	0	0	2	4	1	0	0	0	4	1	2	11	2	0	0
UP000004465	883111	Facklamia hominis CCUG 36813	1717	1	0	0	2	1	0	1	0	0	0	2	1	0	1	0	0	0	0	1	0	0	0	0
UP000004469	457402	Eubacterium sp. 3_1_31	2809	0	0	0	3	1	0	1	0	0	0	0	0	0	0	0	0	0	1	2	1	0	0	0
UP000004470	862514	Pediococcus acidilactici DSM 20284	1884	0	0	1	1	0	0	0	0	0	0	1	1	4	2	0	0	0	1	1	0	0	0	0
UP000004471	629262	Pseudomonas syringae pv. japonica str. M301072	8783	1	0	1	3	0	0	5	0	0	1	2	2	5	7	0	3	3	2	10	0	0	0	0
UP000004474	1210046	Janibacter hoylei PVAS-1	3070	1	2	2	2	0	0	1	0	1	1	11	3	2	5	0	1	3	0	7	0	0	0	0
UP000004478	1225176	Cecembia lonarensis LW9	4213	1	2	2	4	0	0	1	0	0	0	5	2	8	6	0	1	2	1	5	0	1	0	0
UP000004483	1423814	Lactobacillus vaginalis DSM 5837 = ATCC 49540	1870	1	0	2	1	0	0	0	0	0	0	1	1	3	1	0	0	0	1	1	1	0	0	0
UP000004485	434085	gamma proteobacterium IMCC2047	2263	0	0	1	1	0	0	0	0	0	0	1	1	1	3	2	0	0	1	2	0	0	0	0
UP000004494	937450	Oxalobacteraceae bacterium IMCC9480	4019	1	1	1	1	0	0	0	0	0	0	0	5	6	8	2	3	3	2	8	1	1	0	0
UP000004504	883109	Eubacterium infirmum F0142	1765	0	0	0	0	0	0	0	0	0	0	1	1	0	1	0	0	0	1	1	0	0	0	0
UP000004505	469618	Fusobacterium varium ATCC 27725	3007	0	0	1	6	1	0	1	0	0	0	1	1	0	0	0	0	3	1	1	9	1	0	0
UP000004507	314232	Yoonia vestfoldensis SKA53	3061	1	1	1	3	0	0	0	0	0	0	1	4	8	3	1	0	1	1	11	2	0	0	0
UP000004508	485913	Ktedonobacter racemifer DSM 44963	11211	1	1	1	2	1	0	1	0	0	0	9	3	23	24	0	6	7	2	8	0	0	0	0
UP000004510	742159	Achromobacter piechaudii ATCC 43553	5755	1	2	1	3	1	0	1	0	0	1	12	5	21	5	2	3	3	1	21	4	0	0	0
UP000004512	1118153	Halomonas sp. GFAJ-1	3264	1	1	1	1	0	0	0	0	0	0	1	4	4	3	1	1	2	1	14	1	0	0	0
UP000004524	752555	Prevotella bryantii B14	2748	0	0	0	5	1	0	1	0	0	0	4	0	3	1	0	0	1	1	0	2	0	0	0
UP000004528	585506	Weissella paramesenteroides ATCC 33313	1952	1	0	2	1	0	0	0	0	0	0	1	0	5	0	0	0	0	1	3	1	0	0	0
UP000004532	272129	Oscillatoria sp. PCC 6506	5822	1	0	0	5	1	1	1	1	0	0	3	0	8	8	0	1	0	8	3	1	0	0	0
UP000004534	516466	Burkholderia sp. H160	7459	1	3	1	5	1	0	2	0	0	0	8	10	25	16	1	7	9	2	32	3	0	0	0
UP000004547	1160710	Microbacterium laevaniformans OR221	3249	1	2	0	2	0	0	1	2	1	1	2	4	3	5	0	0	2	1	11	0	0	0	0
UP000004557	1162282	Rhodanobacter sp. 115	3918	2	0	1	2	0	0	0	1	0	0	3	2	3	5	0	0	0	1	5	0	0	0	0
UP000004567	1144300	Lactobacillus gastricus PS3	1269	1	1	2	3	1	0	1	0	0	0	0	1	5	2	0	0	0	1	3	2	0	0	0
UP000004602	608534	Oribacterium sp. oral taxon 078 str. F0262	2936	1	0	0	3	1	0	2	0	0	0	1	0	3	0	0	0	1	2	0	0	0	0	0
UP000004619	411483	Faecalibacterium prausnitzii A2-165	3472	1	0	0	1	1	0	2	0	0	0	1	0	2	0	0	0	0	1	0	1	0	0	0
UP000004622	1189611	Nitratireductor aquibiodomus RA22	4240	1	1	1	0	0	0	0	0	0	0	2	3	9	5	1	2	5	1	18	1	0	0	0
UP000004625	797515	Lactobacillus parafarraginis F0439	3183	1	0	2	1	0	0	0	0	0	0	1	1	5	1	0	3	0	1	5	3	0	0	0
UP000004633	749551	Selenomonas artemidis F0399	2195	0	0	1	4	1	0	1	0	0	0	1	0	2	0	0	0	0	1	2	1	0	0	0
UP000004640	931627	Mycobacterium rhodesiae JS60	6999	1	3	0	4	1	1	1	2	1	1	8	18	31	16	0	10	14	4	38	0	0	0	3
UP000004662	644968	Desulfovibrio sp. FW1012B	3713	0	0	0	1	1	0	2	0	0	0	11	0	2	2	0	0	0	1	5	5	0	0	0
UP000004664	697282	Methylobacter tundripaludum SV96	4194	1	1	1	4	1	1	2	0	0	1	1	1	1	1	0	1	0	6	2	0	0	0	0
UP000004671	880073	Caldithrix abyssi DSM 13497	3674	0	0	0	3	1	0	0	0	0	0	6	1	2	2	0	0	0	2	2	1	0	0	0
UP000004674	864051	Burkholderiales bacterium JOSHI_001	4891	1	3	1	3	1	0	1	0	0	0	3	5	10	8	2	2	2	2	8	2	1	0	0
UP000004675	439493	Candidatus Pelagibacter sp. HTCC7211	1446	1	0	1	4	0	0	0	0	0	0	4	1	3	2	0	0	0	1	6	3	0	0	0
UP000004679	637616	Methylophaga thiooxydans DMS010	2492	1	0	1	3	1	0	1	0	0	0	2	0	4	2	0	0	2	1	2	1	0	0	0
UP000004685	575590	Bacteroidetes oral taxon 274 str. F0058	1854	0	0	0	1	1	0	1	0	0	0	3	1	0	0	0	0	1	1	1	1	1	0	0
UP000004688	391616	Octadecabacter arcticus 238	4331	1	1	1	0	0	0	1	0	0	0	0	5	9	3	1	1	2	1	18	1	0	0	0
UP000004690	926559	Joostella marina DSM 19592	3783	1	0	1	2	0	0	1	0	0	0	1	2	12	1	0	0	0	1	8	1	0	0	0
UP000004691	882086	Saccharomonospora xinjiangensis XJ-54	4307	1	0	1	4	1	1	0	0	0	0	4	3	7	7	0	0	3	6	8	0	0	0	1
UP000004692	391615	gamma proteobacterium HTCC5015	2449	1	0	1	1	0	0	0	0	0	0	1	4	1	6	0	0	0	0	6	1	0	0	0
UP000004695	457421	Clostridiales bacterium 1_7_47FAA	6251	1	0	1	3	1	0	2	0	0	0	2	2	8	0	0	1	2	1	2	8	1	0	0
UP000004699	565045	Luminiphilus syltensis NOR5-1B	2923	1	0	1	2	0	0	0	0	0	0	2	3	11	2	1	4	4	1	12	2	1	0	1
UP000004701	633131	Thalassobium sp. R2A62	3672	1	1	1	1	0	0	0	0	0	0	1	3	8	4	0	0	1	1	15	1	0	0	0
UP000004703	244592	Labrenzia alexandrii DFL-11	5363	1	2	1	1	0	0	0	0	0	0	3	7	10	8	1	1	8	2	14	2	0	0	0
UP000004704	645465	Streptomyces sp. e14	6181	1	0	2	5	0	0	1	2	1	1	2	5	11	7	0	1	9	8	22	0	0	0	1
UP000004705	882081	Saccharomonospora azurea NA-128	4376	1	0	1	3	1	1	0	1	0	0	2	3	11	3	0	1	3	1	9	1	0	0	2
UP000004712	575609	Peptoniphilus sp. oral taxon 386 str. F0131	1404	0	0	0	1	0	0	0	0	0	0	1	1	0	1	0	0	0	1	2	1	0	0	0
UP000004719	247639	marine gamma proteobacterium HTCC2080	3184	1	0	1	1	0	0	0	0	0	0	0	6	23	3	0	5	5	1	10	3	0	0	0
UP000004728	983920	Novosphingobium nitrogenifigens DSM 19370	3800	1	1	1	1	1	0	1	0	0	0	4	5	10	5	2	1	3	1	15	0	1	0	0
UP000004731	388401	Rhodobacteraceae bacterium HTCC2150	3636	1	1	1	3	0	0	0	0	0	0	0	4	8	3	0	2	2	2	10	2	0	0	0
UP000004732	555793	Novosphingobium sp. Rr 2-17	4301	1	1	1	1	0	0	1	1	0	0	9	3	10	5	1	0	1	2	12	1	0	0	0
UP000004750	797473	Cardiobacterium valvarum F0432	3026	0	1	1	1	1	0	0	0	0	0	0	0	2	2	0	0	0	1	1	1	0	0	0
UP000004754	887929	Pseudoramibacter alactolyticus ATCC 23263	2514	0	0	1	2	1	0	2	0	0	0	1	1	3	0	0	0	0	1	3	8	1	0	0
UP000004756	518636	Clostridium asparagiforme DSM 15981	6817	1	0	1	4	1	0	2	0	0	0	0	0	4	0	0	1	2	1	2	6	0	0	0
UP000004757	747682	Mycoplasma alligatoris A21JP2	803	0	0	0	0	0	0	0	1	0	0	0	0	0	0	0	0	0	0	1	1	0	0	0
UP000004777	102897	Frankia sp. EUN1f	8160	1	3	1	6	0	0	2	1	1	1	13	16	49	8	0	11	13	16	29	2	0	0	1
UP000004778	525246	Actinomyces urogenitalis DSM 15434	2394	1	0	1	2	0	0	1	0	1	1	6	0	0	3	0	2	0	0	2	0	0	0	0
UP000004793	511051	Caldisericum exile AZM16c01	1566	0	0	0	0	1	1	0	0	0	0	3	0	1	0	0	1	0	1	0	2	0	0	0
UP000004811	1144317	Acidovorax sp. CF316	6721	1	2	1	4	1	0	1	0	0	0	2	9	15	8	2	3	4	1	17	5	0	0	0
UP000004814	396597	Burkholderia ambifaria MEX-5	7124	1	2	1	4	0	0	1	0	0	1	5	6	21	19	1	2	4	3	32	2	0	0	0
UP000004816	679197	Segniliparus rugosus ATCC BAA-974	3502	1	1	1	2	1	1	1	1	0	1	6	1	5	10	0	2	4	3	9	0	0	0	1
UP000004830	742742	Collinsella tanakaei YIT 12063	2204	1	0	1	1	1	0	1	0	0	0	1	0	3	0	0	0	0	1	1	5	0	0	0
UP000004836	1220535	alpha proteobacterium IMCC14465	1890	1	0	1	0	0	0	0	0	0	0	1	2	12	4	0	2	3	1	5	0	0	0	0
UP000004837	1156937	Methylacidiphilum fumariolicum SolV	2208	1	0	2	4	1	1	1	0	1	1	6	0	1	1	0	0	0	1	2	0	0	0	0
UP000004839	1127131	Weissella confusa LBAE C39-2	2147	0	0	1	1	1	0	0	0	0	0	1	0	3	2	0	0	0	1	0	1	0	0	0
UP000004853	1003200	Achromobacter insuavis AXX-A	6159	1	1	1	3	1	0	1	0	0	1	11	7	24	6	2	1	2	1	16	3	0	0	0
UP000004863	1125724	Rothia aeria F0474	2282	1	1	1	3	0	0	0	0	0	0	1	0	2	1	0	0	1	1	4	0	0	0	0
UP000004870	638300	Cardiobacterium hominis ATCC 15826	2580	0	1	1	1	1	0	0	0	0	0	1	0	3	0	0	0	0	1	2	0	0	0	0
UP000004881	1089454	Gordonia terrae NBRC 100016	5126	1	4	1	5	1	1	1	0	0	1	9	11	22	12	0	4	13	2	22	2	0	0	2
UP000004889	1049972	Leptospira licerasiae serovar Varillal str. VAR 010	3927	1	1	0	1	0	0	0	0	0	0	3	4	4	4	0	0	4	0	3	0	1	0	0
UP000004893	553973	Clostridium hylemonae DSM 15053	3971	1	0	0	2	1	0	2	0	0	0	3	0	8	1	0	1	0	1	2	9	0	0	0
UP000004910	428126	Clostridium spiroforme DSM 1552	2358	1	0	0	3	1	0	1	0	0	0	0	0	2	0	0	0	0	1	2	3	0	0	0
UP000004913	742766	Dysgonomonas gadei ATCC BAA-286	4153	1	0	2	2	1	0	1	1	0	0	4	0	5	0	0	1	1	1	2	1	0	0	0
UP000004915	1078020	Mycobacterium thermoresistibile ATCC 19527	4613	1	1	1	3	1	1	1	2	1	2	7	15	20	13	0	6	9	2	15	0	0	0	2
UP000004923	626939	Phascolarctobacterium succinatutens YIT 12067	2148	1	0	1	1	0	0	0	0	0	0	0	1	1	0	0	0	0	1	2	1	0	0	0
UP000004926	882083	Saccharomonospora marina XMU15	5567	1	0	1	3	1	1	0	1	0	0	5	5	9	7	0	2	8	3	15	0	0	0	3
UP000004928	913865	Desulfosporosinus sp. OT	6205	1	1	1	6	1	0	1	0	0	0	5	2	3	0	0	2	0	1	2	1	0	0	0
UP000004931	247633	marine gamma proteobacterium HTCC2143	3661	0	0	0	2	0	0	0	1	0	0	3	6	17	8	0	5	5	2	5	3	0	0	0
UP000004938	1051985	Neisseria weaveri LMG 5135	2233	1	1	1	2	0	0	0	0	0	0	2	1	1	2	0	1	0	1	5	1	0	0	0
UP000004946	864564	Parascardovia denticolens DSM 10105 = JCM 12538	1679	1	0	0	1	0	0	1	1	0	1	2	1	1	3	0	1	0	0	0	1	0	0	0
UP000004947	313628	Lentisphaera araneosa HTCC2155	4982	1	0	2	2	0	0	1	0	0	1	3	1	7	1	0	1	0	1	3	0	0	0	0
UP000004949	1088869	Gluconobacter morbifer G707	2846	1	1	1	3	1	0	1	0	0	0	2	0	9	2	0	1	0	1	7	0	0	0	0
UP000004950	1081736	Listeria fleischmannii subsp. coloradonensis	2909	1	0	1	1	0	0	0	1	0	0	4	0	4	1	0	0	0	1	2	3	0	0	0
UP000004956	762967	Sutterella parvirubra YIT 11816	2483	1	1	1	1	0	0	0	0	0	0	0	0	1	1	0	0	0	1	1	1	0	0	0
UP000004959	1045004	Oenococcus kitaharae DSM 17330	1818	1	0	1	1	0	0	0	0	0	0	2	1	3	4	0	0	0	1	2	0	0	0	0
UP000004968	566550	Hungatella hathewayi DSM 13479	7571	2	0	1	4	1	0	4	4	0	0	1	1	7	0	0	1	0	1	2	5	0	0	0
UP000004972	221359	Synechococcus sp. RS9916	2955	1	1	0	4	1	1	1	1	0	0	3	0	6	1	0	1	0	1	1	1	0	0	0
UP000004976	562982	Gemella morbillorum M424	1616	0	0	0	1	1	0	1	0	0	0	0	1	1	1	0	0	0	0	3	1	0	0	0
UP000004978	1037410	Mycoplasma columbinum SF7	614	0	0	0	0	0	0	0	0	0	0	0	0	0	1	0	0	0	0	1	0	0	0	0
UP000004986	629263	Pseudomonas syringae pv. pisi str. 1704B	9139	1	0	1	4	0	0	1	0	1	1	1	2	13	6	0	1	3	1	15	2	1	0	0
UP000005010	182217	Helicobacter cetorum MIT 00-7128	1722	1	0	1	1	0	0	0	0	0	0	0	0	3	0	0	0	0	1	1	0	0	0	0
UP000005017	679192	Bulleidia extructa W1219	1415	0	0	1	1	1	0	1	0	0	0	0	0	1	1	0	0	0	0	1	2	0	0	0
UP000005019	1000565	Methyloversatilis universalis FAM5	3919	1	0	1	2	0	0	0	0	0	0	7	3	3	6	2	1	1	2	2	0	0	0	0
UP000005039	1095750	Lachnoanaerobaculum saburreum F0468	3005	1	0	1	4	1	0	1	0	0	0	0	1	1	0	0	0	1	1	2	3	0	1	0
UP000005050	660596	Pantoea stewartii subsp. stewartii DC283	4581	1	1	2	3	0	0	0	0	0	0	1	0	5	5	0	1	0	1	7	4	0	0	0
UP000005055	1034808	Mycoplasma anatis 1340	803	0	0	0	0	0	0	0	1	0	0	0	0	0	0	0	0	0	0	0	0	0	0	0
UP000005063	313589	Janibacter sp. HTCC2649	4081	1	1	1	3	0	0	2	2	1	1	8	7	7	9	0	1	3	1	8	0	0	0	0
UP000005082	644076	Silicibacter sp. TrichCH4B	4721	0	2	1	2	0	0	0	0	0	0	0	7	7	5	1	1	2	2	22	1	0	0	0
UP000005089	556269	Oxalobacter formigenes OXCC13	2076	1	0	1	2	1	0	1	0	0	0	0	0	0	1	0	0	0	2	3	0	0	0	0
UP000005090	686340	Methylomicrobium album BG8	3738	1	1	1	4	1	1	1	0	0	0	3	1	4	2	0	1	0	1	2	0	0	0	0
UP000005093	644107	Silicibacter lacuscaerulensis ITI-1157	3603	0	3	1	1	0	0	0	0	0	0	1	5	6	5	2	0	2	1	10	1	0	0	0
UP000005096	584708	Aminomonas paucivorans DSM 12260	2391	1	0	1	1	1	0	1	0	0	0	1	0	1	1	0	0	0	1	2	3	0	0	0
UP000005104	768710	Desulfosporosinus youngiae DSM 17734	5108	0	0	0	5	1	0	1	0	0	0	3	10	5	1	0	0	1	1	2	2	0	0	0
UP000005106	641107	Clostridium sp. DL-VIII	5645	1	0	1	6	1	0	1	1	0	0	7	2	6	2	0	2	1	2	2	11	0	0	0
UP000005135	467661	Rhodobacteraceae bacterium KLH11	4229	0	3	1	1	0	0	0	0	0	0	0	5	9	2	1	0	1	1	13	1	0	0	0
UP000005139	401526	Thermosinus carboxydivorans Nor1	2738	0	0	1	2	1	0	1	0	0	0	1	2	1	0	0	0	1	1	2	3	0	0	0
UP000005141	702438	Prevotella oulorum F0390	2483	0	0	0	2	1	0	0	0	0	0	1	0	1	0	0	1	1	1	0	0	0	0	0
UP000005143	1097667	Patulibacter medicamentivorans	4372	1	1	2	5	0	2	0	0	0	0	7	8	17	12	0	4	6	1	19	1	0	0	2
UP000005147	883112	Facklamia ignava CCUG 37419	1621	0	0	0	1	0	0	0	0	0	0	2	1	0	0	0	0	0	0	1	0	0	0	0
UP000005159	314289	Vibrio sp. AND4	3926	1	1	2	1	1	0	1	0	0	0	5	0	2	6	0	0	1	0	7	2	0	0	0
UP000005167	1049564	endosymbiont of Tevnia jerichonana (vent Tica)	3230	0	2	1	3	1	0	1	0	0	0	0	0	2	1	0	0	0	1	2	0	0	0	0
UP000005177	525329	Lactobacillus jensenii JV-V16	1436	0	0	0	2	0	0	0	0	0	0	3	1	0	0	0	0	0	0	1	0	0	0	0
UP000005178	445971	Anaerofustis stercorihominis DSM 17244	2331	0	0	1	1	0	0	0	0	0	0	0	1	0	1	0	1	0	1	1	5	1	0	0
UP000005219	693746	Oscillibacter valericigenes Sjm18-20	4593	0	0	0	0	1	0	1	0	0	0	3	1	2	1	0	0	0	1	1	2	0	0	0
UP000005234	767434	Frateuria aurantia DSM 6220	3098	1	1	1	1	0	0	0	0	0	0	3	1	8	4	0	0	0	1	11	1	0	0	0
UP000005244	796937	Peptoanaerobacter stomatis	2275	0	0	1	5	1	0	1	0	0	0	0	1	0	0	0	0	1	1	1	3	0	0	0
UP000005258	1110502	Tistrella mobilis KA081020-065	5778	1	1	1	1	0	0	1	0	0	1	5	6	24	10	2	2	11	1	18	1	0	0	0
UP000005262	768704	Desulfosporosinus meridiei DSM 13257	4340	0	0	0	5	0	0	0	0	0	0	3	6	1	0	0	0	1	1	0	0	0	0	0
UP000005263	187303	Methylocystis sp. SC2	4040	1	3	1	1	1	0	1	0	0	0	1	3	5	3	2	0	3	1	4	2	0	0	0
UP000005267	1036672	Advenella kashmirensis WT001	3933	0	1	1	2	0	0	0	0	0	0	4	2	16	6	1	1	7	1	7	4	0	0	0
UP000005269	333849	Enterococcus faecium DO	3059	0	0	0	2	0	0	0	0	0	0	2	1	4	0	0	0	1	2	1	4	0	0	0
UP000005273	592015	Acetomicrobium hydrogeniformans ATCC BAA-1850	2196	0	0	1	3	1	0	1	0	1	1	4	1	1	0	0	0	0	1	1	3	0	0	0
UP000005275	765910	Marichromatium purpuratum 984	3249	1	0	1	3	3	0	1	0	0	1	7	1	2	5	0	0	2	1	1	1	0	0	0
UP000005286	879305	Anaerococcus prevotii ACS-065-V-Col13	1634	0	1	0	1	1	0	3	0	0	0	0	1	0	0	0	0	1	0	2	1	0	0	0
UP000005297	314345	Mariprofundus ferrooxydans PV-1	2856	1	1	2	4	1	0	1	0	0	0	1	0	3	1	0	0	0	1	1	1	0	0	0
UP000005307	391626	Octadecabacter antarcticus 307	4327	1	1	1	0	0	0	1	0	0	0	0	5	16	1	1	1	1	1	13	4	0	0	0
UP000005309	638302	Selenomonas flueggei ATCC 43531	2117	0	0	1	4	1	0	1	0	0	0	0	0	2	0	0	0	0	1	2	0	0	0	0
UP000005314	519989	Ectothiorhodospira sp. PHS-1	2789	1	1	1	2	1	0	1	0	0	0	4	1	2	1	0	0	1	1	2	0	0	0	0
UP000005316	1027292	Sporosarcina newyorkensis 2681	3825	0	0	0	1	0	0	0	0	0	0	2	6	7	3	0	1	2	2	12	3	0	0	0
UP000005317	870187	Thiothrix nivea DSM 5205	4218	1	2	1	4	1	0	2	0	0	0	11	3	3	2	0	0	1	1	1	0	0	0	0
UP000005324	525371	Roseomonas cervicalis ATCC 49957	4774	1	1	1	2	0	0	1	0	0	1	4	3	11	4	0	0	2	1	8	2	0	0	0
UP000005330	1177931	Thiovulum sp. ES	2104	0	2	1	1	0	0	0	0	0	0	1	0	1	0	0	0	0	1	1	1	0	0	0
UP000005332	997355	Cutibacterium avidum ATCC 25577	2376	1	2	1	3	0	0	2	2	1	1	6	0	1	4	0	0	1	1	4	1	0	0	0
UP000005336	1030841	Neisseria wadsworthii 9715	2553	1	1	1	2	0	0	0	0	0	0	1	1	4	2	0	0	0	1	7	1	0	0	0
UP000005351	888056	Actinomyces sp. oral taxon 448 str. F0400	2518	1	1	1	2	0	0	1	1	1	1	5	0	1	1	0	0	0	0	5	0	0	0	0
UP000005380	717772	Thiomicrospira aerophila AL3	2067	1	1	1	3	1	0	1	0	0	0	2	0	3	1	0	0	0	1	1	1	0	0	0
UP000005383	339854	Bacillus thuringiensis serovar israelensis ATCC 35646	6129	1	1	1	5	1	0	1	1	0	0	1	3	5	7	0	1	1	1	6	5	1	0	0
UP000005384	742737	Hungatella hathewayi WAL-18680	5166	1	0	1	6	1	0	2	1	0	0	3	0	7	0	0	0	0	1	1	4	0	0	0
UP000005387	717606	Paenibacillus curdlanolyticus YK9	4803	1	0	1	8	3	0	1	0	0	0	4	2	8	4	0	4	0	8	4	1	0	0	0
UP000005388	764291	Streptococcus urinalis 2285-97	2206	0	0	0	3	1	0	1	0	0	0	1	0	2	0	0	0	0	1	3	1	0	0	0
UP000005392	997347	Fusobacterium nucleatum subsp. animalis ATCC 51191	2777	0	0	0	1	0	0	1	0	0	0	0	0	0	0	0	0	0	1	1	4	1	0	0
UP000005395	314266	Sphingomonas sp. SKA58	3892	1	1	1	1	1	0	1	0	0	0	3	9	17	6	0	1	3	1	7	0	0	0	0
UP000005413	911238	Staphylococcus simiae CCM 7213	2592	0	0	0	2	0	0	0	0	0	0	1	2	4	3	0	0	0	1	5	0	0	0	0
UP000005435	720554	Clostridium clariflavum DSM 19732	3774	0	0	0	7	3	0	1	0	0	0	3	0	5	0	0	0	0	2	2	6	0	0	0
UP000005436	203275	Tannerella forsythia 92A2	2978	1	0	0	2	1	0	2	0	0	0	2	0	1	0	0	0	0	1	1	1	1	0	0
UP000005437	1114970	Pseudomonas fluorescens F113	5837	1	1	2	2	1	0	1	0	0	1	4	6	21	15	0	1	3	3	32	5	0	0	0
UP000005438	700598	Niastella koreensis GR20-10	7171	3	1	1	3	0	0	2	0	0	1	4	2	15	5	0	2	2	1	6	2	1	0	0
UP000005440	134676	Actinoplanes sp. SE50/110	8249	1	3	1	4	1	0	1	4	2	1	17	5	8	13	0	2	4	4	13	1	0	0	0
UP000005442	710685	Mycobacterium rhodesiae NBB3	6105	1	2	0	3	1	1	1	1	1	2	7	10	29	21	0	12	11	4	18	1	0	0	3
UP000005444	701521	Pediococcus claussenii ATCC BAA-344	1877	0	0	1	1	1	0	1	0	0	0	1	1	1	0	0	3	0	1	3	1	0	0	0
UP000005451	561177	Anaerococcus hydrogenalis DSM 7454	2068	2	2	1	1	1	0	4	0	0	0	2	1	1	0	0	1	0	0	2	4	0	0	0
UP000005459	768671	Thiocapsa marina 5811	4915	1	2	1	3	3	0	1	0	0	1	8	1	3	4	0	1	1	3	1	1	0	0	0
UP000005460	1035189	Streptococcus infantis SK970	2144	0	0	0	1	1	0	1	1	0	0	1	1	0	0	0	0	0	1	0	0	0	0	0
UP000005481	861450	Anaeroglobus geminatus F0357	2148	2	0	1	2	0	0	0	0	0	0	0	1	0	0	0	0	1	1	1	2	0	0	0
UP000005496	555779	Desulfonatronospira thiodismutans ASO3-1	3577	0	0	0	6	1	0	1	0	0	0	2	0	1	0	0	0	0	1	4	2	0	0	0
UP000005498	161528	Erythrobacter sp. SD-21	2938	1	1	1	3	0	0	0	0	0	0	4	4	8	4	1	2	3	1	8	0	0	0	0
UP000005512	500637	Providencia rustigianii DSM 4541	3967	1	0	2	2	1	0	1	0	0	0	3	0	1	3	0	0	0	1	8	3	0	0	0
UP000005513	1004836	Gluconacetobacter sp. SXCC-1	4747	1	1	1	3	1	0	1	0	0	0	7	0	13	5	0	1	0	1	5	0	0	0	0
UP000005519	667128	Pasteurella dagmatis ATCC 43325	2053	0	0	1	1	1	0	1	0	0	0	1	1	2	3	0	0	0	1	4	3	0	0	0
UP000005532	637911	Actinobacillus minor NM305	2407	0	0	1	2	1	0	1	0	0	0	0	0	1	2	0	0	0	1	3	1	0	0	0
UP000005551	1189621	Nitritalea halalkaliphila LW7	3102	0	0	1	2	1	0	0	1	0	0	2	0	3	4	0	2	1	1	3	0	1	0	0
UP000005555	314287	gamma proteobacterium HTCC2207	2388	0	0	0	2	0	0	0	0	0	0	0	3	7	5	0	1	2	1	6	0	0	0	0
UP000005561	478749	Marvinbryantia formatexigens DSM 14469	4894	2	0	1	2	2	0	2	0	0	0	2	0	5	0	0	1	0	1	1	4	0	0	0
UP000005566	1086011	Flavobacterium frigoris PS1	3590	1	0	1	2	1	0	1	0	0	0	4	3	1	1	0	0	0	1	9	1	0	0	0
UP000005580	873533	Prevotella oralis ATCC 33269	2479	0	0	0	3	1	0	1	0	0	0	3	0	1	0	0	0	1	1	0	0	0	0	0
UP000005583	525365	Lactobacillus ultunensis DSM 16047	2210	1	0	1	4	1	0	1	0	0	0	2	1	2	3	0	0	0	2	1	0	0	0	0
UP000005593	221360	Synechococcus sp. RS9917	2748	1	1	0	3	1	1	1	1	0	0	3	0	3	2	0	0	0	0	1	1	0	0	0
UP000005604	675813	Vibrio metschnikovii CIP 69.14	3034	1	0	2	3	1	0	1	0	0	0	1	0	1	6	1	1	1	1	4	3	0	0	0
UP000005610	391613	Roseovarius sp. TM1035	4086	1	2	1	2	0	0	0	0	0	0	0	4	11	6	2	1	1	2	11	1	0	0	0
UP000005615	876044	gamma proteobacterium IMCC3088	2855	1	0	1	1	0	0	1	0	0	0	1	6	15	1	0	4	3	1	6	3	1	0	0
UP000005617	658085	Lachnospiraceae bacterium 5_1_57FAA	3365	1	0	0	1	1	0	2	0	0	0	0	0	5	1	0	0	0	1	2	4	0	0	0
UP000005631	926562	Owenweeksia hongkongensis DSM 17368	3471	1	1	2	4	0	0	0	0	0	0	7	2	6	2	0	1	1	1	6	1	1	0	0
UP000005632	158190	Sphaerochaeta pleomorpha str. Grapes	3150	0	0	0	0	1	1	0	0	0	0	8	0	3	0	0	1	0	1	2	5	0	0	0
UP000005633	640081	Dechlorosoma suillum PS	3432	1	1	1	3	0	0	0	0	0	0	5	3	4	5	4	2	3	1	2	1	1	0	0
UP000005634	911045	Pseudovibrio sp. FO-BEG1	5456	1	0	1	1	0	0	0	0	0	0	3	2	15	7	1	2	1	4	14	4	0	0	0
UP000005635	1111069	Thermus sp. CCB_US3_UF1	2259	1	0	1	2	1	1	0	0	0	0	3	2	5	1	0	0	2	1	3	0	1	0	0
UP000005638	1041826	Flavobacterium columnare ATCC 49512	2617	1	0	2	2	0	0	0	0	0	0	3	2	0	1	0	2	0	1	3	1	1	0	0
UP000005663	1037409	Bradyrhizobium japonicum USDA 6	8787	1	2	1	2	2	0	1	1	0	1	7	8	28	21	2	4	10	1	18	3	0	0	0
UP000005667	862719	Azospirillum lipoferum 4B	6062	1	1	1	7	1	0	1	1	0	0	7	5	10	7	0	0	5	1	12	1	0	0	0
UP000005692	550984	Halomonas sp. HAL1	4144	1	0	1	2	1	0	1	0	0	1	6	4	9	1	1	1	0	1	19	3	0	0	0
UP000005695	281689	Desulfuromonas acetoxidans DSM 684	3204	1	0	2	2	1	0	1	0	0	0	4	0	0	0	0	0	1	2	3	4	0	0	0
UP000005697	888743	Prevotella multiformis DSM 16608	2884	0	0	0	1	1	0	1	0	0	0	3	0	0	0	0	0	1	1	0	0	0	0	0
UP000005707	1033810	Haloplasma contractile SSD-17B	3019	0	0	0	2	2	0	1	0	0	0	1	0	0	2	0	0	1	1	2	2	0	0	0
UP000005709	553220	Campylobacter gracilis RM3268	2846	1	1	1	1	0	0	0	0	0	0	5	0	2	0	0	0	0	1	1	1	0	0	0
UP000005711	596330	Peptoniphilus lacrimalis 315-B	1588	0	0	0	1	0	0	0	0	0	0	1	1	0	1	0	0	1	1	0	1	0	0	0
UP000005713	388399	Sagittula stellata E-37	5025	1	1	1	0	1	0	1	0	0	0	0	5	15	4	1	2	2	2	14	4	0	0	0
UP000005714	585530	Brevibacterium mcbrellneri ATCC 49030	2432	0	3	2	1	0	0	1	0	1	0	2	2	3	4	0	1	3	1	7	0	0	0	0
UP000005722	706439	Actinomyces sp. oral taxon 171 str. F0337	3149	1	1	1	4	0	0	1	1	1	1	6	0	1	1	0	0	0	0	6	1	0	0	0
UP000005723	667129	Serratia odorifera DSM 4582	5121	2	0	2	3	1	0	1	0	0	0	4	0	7	8	0	0	1	1	14	2	0	0	0
UP000005726	663321	Candidatus Regiella insecticola LSR1	1368	1	0	0	0	0	0	0	0	0	0	1	0	2	0	0	0	0	1	1	0	0	0	0
UP000005735	744980	Roseibium sp. TrichSKD4	5884	1	2	1	1	0	0	0	0	0	0	1	3	9	5	1	1	5	1	13	2	0	0	0
UP000005737	929563	Leptonema illini DSM 21528	4129	1	1	0	2	0	0	0	0	0	0	5	2	4	7	0	3	2	1	5	0	1	0	0
UP000005744	395493	Beggiatoa alba B18LD	3440	1	1	1	3	1	1	1	0	0	0	4	3	3	4	3	0	2	1	4	0	0	0	0
UP000005746	314270	Rhodobacteraceae bacterium HTCC2083	4108	1	1	0	2	0	0	0	0	0	0	0	5	11	7	1	1	4	2	17	1	0	0	0
UP000005753	633697	Eubacterium cellulosolvens 6	2716	1	0	1	3	1	0	3	0	0	0	2	1	0	0	0	1	0	1	0	0	0	0	0
UP000005759	501479	Citreicella sp. SE45	5420	1	2	1	3	0	0	1	0	0	0	0	6	14	5	2	2	2	2	16	3	0	0	0
UP000005763	253839	Streptomyces sp. C	7528	1	2	1	6	0	0	1	1	0	1	5	7	10	17	0	3	6	11	14	2	0	0	0
UP000005766	91464	Synechococcus sp. PCC 7335	5475	2	1	0	4	2	1	1	0	0	0	12	0	5	11	0	1	0	3	4	1	0	0	0
UP000005774	319017	Bradyrhizobium sp. WSM471	7070	1	2	2	2	2	0	1	1	0	1	7	10	26	20	1	4	8	1	11	2	0	0	0
UP000005776	439497	Ruegeria sp. R11	3652	0	3	1	1	0	0	0	0	0	0	0	5	7	5	1	0	2	2	18	1	0	0	0
UP000005777	641146	Scardovia inopinata F0304	1482	1	0	0	1	0	0	1	0	0	1	4	1	2	2	0	0	0	0	0	1	0	0	0
UP000005778	879212	Desulfobacter postgatei 2ac9	3396	1	0	1	6	0	0	1	0	0	0	6	3	2	1	0	1	1	2	3	1	6	0	0
UP000005785	929704	Myroides odoratus DSM 2801	3687	1	0	1	3	0	0	0	0	0	0	4	3	1	1	0	1	0	1	5	0	1	0	0
UP000005801	391625	Plesiocystis pacifica SIR-1	8437	0	0	1	0	0	0	1	0	0	0	1	5	12	9	0	4	0	9	9	1	0	0	1
UP000005820	525268	Corynebacterium striatum ATCC 6940	2668	0	2	2	3	0	0	1	1	0	1	4	2	2	1	0	0	1	1	10	0	0	0	0
UP000005824	497964	Chthoniobacter flavus Ellin428	6705	1	1	0	4	1	1	1	1	1	0	6	1	5	2	0	0	0	2	6	2	0	0	0
UP000005835	742823	Sutterella wadsworthensis 2_1_59BFAA	2327	1	1	1	1	0	0	0	0	0	0	0	0	1	1	0	0	0	1	2	5	0	0	0
UP000005837	546274	Eikenella corrodens ATCC 23834	2627	1	1	1	1	0	0	0	0	0	0	0	0	2	2	0	0	0	1	4	1	0	0	0
UP000005839	314608	Shewanella benthica KT99	4158	0	0	1	2	0	0	1	0	0	0	1	1	2	5	0	1	0	2	9	3	0	0	0
UP000005845	1089453	Gordonia sputi NBRC 100414	4587	1	3	2	3	1	1	1	0	0	1	7	6	12	9	0	3	6	2	14	1	0	0	1
UP000005850	1042163	Brevibacillus laterosporus LMG 15441	4532	0	0	0	4	0	0	0	0	0	0	4	4	5	3	0	0	1	4	8	3	0	0	0
UP000005853	262489	delta proteobacterium MLMS-1	4800	0	0	0	8	0	0	2	0	0	0	8	0	2	0	0	0	0	1	4	5	0	0	0
UP000005856	443152	Marinobacter algicola DG893	4113	2	0	1	1	0	0	0	0	0	0	5	6	7	3	0	3	3	2	13	4	0	0	2
UP000005868	580340	Thermovirga lienii DSM 17291	1853	0	0	1	2	0	0	0	0	0	0	3	0	1	0	0	0	0	1	1	3	0	0	0
UP000005870	1045855	Pseudoxanthomonas spadix BD-a59	3147	1	1	1	3	1	0	2	0	0	1	3	1	8	4	1	2	0	1	4	0	0	0	0
UP000005926	638301	Granulicatella adiacens ATCC 49175	1920	0	0	0	1	1	0	1	0	0	0	1	1	2	0	0	0	0	1	1	3	0	0	0
UP000005938	946077	Imtechella halotolerans K1	2694	1	0	1	2	0	0	0	0	0	1	2	2	3	0	0	0	0	1	6	0	1	0	0
UP000005939	1088868	Commensalibacter intestini A911	2209	1	0	1	1	0	0	0	0	0	0	2	0	3	0	0	1	0	1	5	3	0	0	0
UP000005940	1114943	Streptomyces tsukubensis NRRL18488	6684	1	0	2	6	0	0	1	1	1	1	5	8	18	13	0	3	8	25	16	2	0	0	0
UP000005943	314262	Roseobacter sp. MED193	4501	0	3	1	2	0	0	0	0	0	0	0	6	6	4	1	2	3	2	19	1	0	0	0
UP000005947	525256	Atopobium vaginae DSM 15829	1243	0	0	0	2	1	0	1	0	0	0	0	0	0	1	0	0	0	0	1	0	0	0	0
UP000005950	545696	Holdemania filiformis DSM 12042	4221	0	0	0	5	1	0	2	0	0	0	1	0	6	0	0	0	0	0	3	2	0	0	0
UP000005952	670307	Hyphomicrobium denitrificans 1NES1	3832	1	3	1	2	0	0	0	0	0	0	2	2	6	1	2	1	2	1	5	0	0	0	0
UP000005953	314283	Reinekea blandensis MED297	4236	1	0	2	3	0	0	1	0	0	0	4	3	3	2	0	3	1	1	8	1	0	0	1
UP000005954	89187	Roseovarius nubinhibens ISM	3545	1	1	1	1	0	0	0	0	0	0	0	5	9	6	1	0	1	2	15	1	0	0	0
UP000005963	742816	Megamonas funiformis YIT 11815	2525	1	0	1	3	1	0	1	0	0	0	2	0	4	0	0	0	0	1	0	3	0	0	0
UP000005964	388739	Roseobacter sp. SK209-2-6	4497	0	2	2	4	0	0	0	0	0	0	0	6	6	0	1	0	3	2	19	1	0	0	0
UP000005981	392423	Hydrogenivirga sp. 128-5-R1-1	3805	0	0	2	2	0	0	0	0	0	0	5	0	2	0	0	0	0	2	4	0	0	0	0
UP000005984	525254	Anaerococcus lactolyticus ATCC 51172	2252	1	0	1	1	1	0	3	0	0	0	1	1	0	0	0	0	0	0	1	2	0	0	0
UP000005985	795665	Hydrogenophaga sp. PBC	4855	1	3	1	2	0	0	0	0	0	0	5	4	11	3	2	4	5	4	13	2	0	0	0
UP000005990	908337	Eremococcus coleocola ACS-139-V-Col8	1720	1	0	1	1	0	0	0	0	0	0	2	4	2	2	0	0	2	0	3	1	0	0	0
UP000006000	411463	Eubacterium ventriosum ATCC 27560	2776	1	0	0	0	1	0	1	0	0	0	1	1	1	0	0	0	0	1	0	5	0	0	0
UP000006004	546270	Gemella haemolysans ATCC 10379	1709	0	0	0	1	1	0	1	0	0	0	1	1	0	1	0	0	0	0	1	1	0	0	0
UP000006008	742725	Alistipes indistinctus YIT 12060	2348	1	0	1	3	1	0	1	0	0	0	2	0	1	0	0	1	1	1	1	2	1	0	0
UP000006011	314254	Oceanicaulis sp. HTCC2633	3028	1	0	1	2	0	0	0	0	0	0	2	2	6	5	0	2	2	1	9	1	0	0	0
UP000006023	1075090	Gordonia amarae NBRC 15530	4691	1	3	1	3	1	1	1	0	0	1	5	10	20	11	0	2	7	4	18	4	0	0	1
UP000006028	748224	Faecalibacterium cf. prausnitzii KLE1255	3352	1	0	0	1	1	0	2	0	0	0	1	0	3	0	0	0	0	1	0	3	0	0	0
UP000006034	563192	Bilophila wadsworthia 3_1_6	3779	1	0	0	2	0	0	0	0	0	0	3	1	4	0	0	0	0	1	3	5	0	0	0
UP000006036	537971	Helicobacter cinaedi CCUG 18818 = ATCC BAA-847	2315	1	1	1	2	0	0	0	0	0	0	0	0	3	0	0	0	0	1	0	0	0	0	0
UP000006048	869212	Turneriella parva DSM 21527	4092	1	0	1	3	0	0	0	0	0	0	2	2	0	9	0	0	2	0	5	1	0	0	0
UP000006049	746697	Aequorivita sublithincola DSM 14238	3134	2	0	1	3	0	0	0	0	0	0	4	2	3	3	0	2	1	1	7	2	1	0	0
UP000006050	866536	Belliella baltica DSM 15883	3609	1	0	2	1	1	0	1	0	0	0	6	2	5	3	0	2	1	1	3	0	1	0	0
UP000006051	867902	Ornithobacterium rhinotracheale DSM 15997	2138	1	1	1	2	0	0	0	0	0	0	3	0	2	2	0	0	0	1	2	0	1	0	0
UP000006054	880071	Bernardetia litoralis DSM 6794	3832	1	1	1	3	0	0	0	0	0	0	1	2	5	1	0	1	1	1	5	0	0	0	0
UP000006055	706587	Desulfomonile tiedjei DSM 6799	5412	0	0	0	6	1	0	1	0	0	0	6	8	7	2	0	0	6	1	3	0	3	0	0
UP000006056	926566	Terriglobus roseus DSM 18391	3936	1	1	0	3	1	1	0	0	0	1	12	0	9	6	0	1	1	1	4	0	0	0	0
UP000006057	710421	Mycolicibacterium chubuense NBB4	5779	1	2	0	3	1	1	1	1	1	2	9	12	25	13	0	6	8	7	21	1	0	0	2
UP000006061	891968	Acetomicrobium mobile DSM 13181	2004	0	0	1	4	1	0	1	0	0	0	5	0	2	0	0	0	0	1	1	3	0	0	0
UP000006062	765911	Thiocystis violascens DSM 198	4192	1	2	1	3	2	0	1	0	0	1	11	1	4	3	0	0	1	1	0	0	0	0	0
UP000006069	742818	Slackia piriformis YIT 12062	1794	1	1	2	1	0	0	0	0	0	0	1	0	1	1	0	0	1	1	3	1	0	0	0
UP000006072	1194972	Mycobacterium vaccae ATCC 25954	5949	1	1	1	4	1	1	1	2	2	2	14	8	30	17	0	10	9	8	27	0	0	0	0
UP000006073	1189612	Indibacter alkaliphilus LW1	4650	1	0	2	2	0	0	1	0	0	0	6	2	7	6	0	2	2	1	5	1	0	0	0
UP000006074	1212545	Staphylococcus arlettae CVD059	2434	1	0	1	1	0	0	0	0	0	0	2	3	3	4	0	0	1	1	6	0	0	0	0
UP000006075	888439	Actinomyces neuii BVS029A5	1934	1	1	1	2	0	0	1	2	1	1	4	0	0	1	0	0	1	0	3	1	0	0	0
UP000006078	883169	Turicella otitidis ATCC 51513	1846	0	2	2	3	0	0	0	0	0	0	2	1	1	0	0	0	1	0	6	0	0	0	0
UP000006080	1223565	Rhizobium sp. Pop5	7019	1	3	1	2	0	0	2	2	1	1	2	3	21	8	1	4	3	1	25	1	0	0	0
UP000006085	883096	Bergeyella zoohelcum ATCC 43767	2120	1	0	1	2	0	0	0	0	0	0	4	2	1	0	0	0	1	1	2	1	1	0	0
UP000006094	1128398	Gottschalkia acidurici 9a	2839	0	0	0	2	1	0	1	0	0	0	0	0	1	1	0	0	0	1	1	0	0	0	0
UP000006097	744985	alpha proteobacterium HIMB59	1493	0	0	0	1	0	0	0	0	0	0	2	1	5	0	0	0	0	1	8	2	0	0	0
UP000006098	859653	alpha proteobacterium HIMB5	1431	0	0	0	1	0	0	0	0	0	0	1	1	2	1	0	0	0	1	5	1	0	0	0
UP000006135	990288	Acidithiobacillus caldus SM-1	3062	1	2	1	1	1	0	1	0	0	0	1	0	2	1	0	0	0	1	1	1	0	0	0
UP000006138	713604	Amycolatopsis mediterranei S699	9551	1	1	1	4	1	1	1	3	1	1	11	10	18	33	0	6	5	8	24	2	0	0	2
UP000006160	592027	Clostridium botulinum D str. 1873	2367	0	0	0	3	1	1	0	0	0	0	1	1	0	0	0	0	0	1	1	1	0	0	0
UP000006173	484020	Bifidobacterium bifidum BGN4	1834	1	1	0	1	0	0	1	1	0	1	1	0	1	0	0	0	0	0	2	0	0	0	0
UP000006177	1048260	Leptospirillum ferriphilum ML-04	2450	0	1	1	2	1	1	0	2	1	1	7	0	1	0	0	0	0	1	1	0	0	0	0
UP000006178	1094508	Thermoanaerobacterium saccharolyticum JW/SL-YS485	2778	0	0	1	4	0	0	0	0	1	0	4	0	0	0	0	0	0	1	2	2	0	0	0
UP000006180	1185652	Sinorhizobium fredii USDA 257	6697	1	2	1	3	2	0	1	0	0	0	5	5	20	6	1	2	3	2	21	2	0	0	0
UP000006190	883113	Facklamia languida CCUG 37842	1527	1	0	0	1	1	0	1	0	0	0	4	1	0	1	0	0	0	0	1	0	0	0	0
UP000006196	525263	Corynebacterium lipophiloflavum DSM 44291	2371	0	3	2	3	0	0	1	1	1	1	7	1	2	0	0	1	1	0	2	1	0	0	0
UP000006201	87626	Pseudoalteromonas tunicata D2	4490	0	0	1	4	0	0	1	0	0	0	0	1	5	5	0	0	0	1	8	3	0	0	0
UP000006217	1214225	Acidocella sp. MX-AZ02	3506	1	1	1	1	0	0	1	0	1	1	5	3	11	4	1	0	1	1	9	1	0	0	0
UP000006223	658659	Erysipelotrichaceae bacterium 3_1_53	3855	0	0	0	3	1	0	1	0	0	0	1	0	5	0	0	0	1	1	0	6	0	0	0
UP000006228	945550	Vibrio sinaloensis DSM 21326	4595	1	1	2	2	1	0	1	0	0	1	5	0	3	5	1	1	1	1	8	3	0	0	0
UP000006229	1131455	Mycoplasma canis UFG4	642	0	0	0	0	0	0	0	1	0	0	0	0	0	0	0	0	0	0	1	0	0	0	0
UP000006230	314265	Salipiger bermudensis HTCC2601	5420	1	2	1	0	1	0	1	0	0	0	1	5	19	5	2	1	5	2	20	2	0	0	0
UP000006233	634994	Leptotrichia hofstadii F0254	2840	0	0	0	2	1	1	0	1	0	0	1	0	0	0	0	1	0	1	1	3	0	0	0
UP000006235	1035188	Haemophilus pittmaniae HK 85	2390	0	0	1	1	0	0	1	0	0	0	0	0	1	1	0	0	0	1	2	1	0	0	0
UP000006237	548478	Corynebacterium glucuronolyticum ATCC 51866	2733	0	2	1	3	0	0	1	1	1	1	6	0	0	3	0	0	0	1	3	0	0	0	0
UP000006242	1033802	Salinisphaera shabanensis E1L3A	3524	1	0	1	0	0	0	0	0	0	0	7	4	8	14	0	3	6	3	10	0	0	0	1
UP000006251	1121922	Glaciecola pallidula DSM 14239 = ACAM 615	4036	1	0	2	2	1	0	1	0	0	0	4	3	12	7	1	1	3	1	11	2	1	0	0
UP000006252	888052	Actinomyces sp. oral taxon 180 str. F0310	2070	0	0	1	3	0	0	1	0	0	1	6	0	0	1	0	0	0	0	2	0	0	0	0
UP000006258	525373	Sphingobacterium spiritivorum ATCC 33861	4471	1	0	1	1	1	0	1	0	0	0	2	2	7	1	0	0	1	1	7	0	0	0	0
UP000006265	1122247	Mycobacterium hassiacum DSM 44199	4959	1	2	0	4	1	1	1	1	1	2	4	11	21	12	0	7	11	4	22	0	0	0	1
UP000006276	1228997	Riemerella anatipestifer RA-CH-1	2187	1	2	1	2	0	0	0	0	0	0	3	2	2	2	0	0	0	1	2	0	1	0	0
UP000006279	1229756	Leuconostoc gelidum JB7	1795	1	0	3	2	0	0	0	1	0	0	1	1	2	2	0	0	0	1	3	1	0	0	0
UP000006281	1179773	Saccharothrix espanaensis DSM 44229	8423	1	3	2	5	1	1	1	4	1	1	12	5	13	24	1	4	5	14	18	2	0	0	2
UP000006282	385025	Cycloclasticus sp. P1	2247	1	0	1	2	0	0	0	0	0	0	0	4	8	6	2	0	3	1	6	0	0	0	0
UP000006286	930169	Alcanivorax dieselolei B5	4388	1	1	1	0	0	0	0	0	0	0	5	6	18	12	0	2	10	1	13	0	0	0	1
UP000006294	698758	Amphibacillus xylanus NBRC 15112	2384	1	0	1	1	0	0	0	0	0	0	1	1	4	0	0	0	0	1	2	1	0	0	0
UP000006295	1004785	Alteromonas macleodii str. Black Sea 11	3751	1	1	2	1	1	0	1	0	0	0	5	2	4	6	0	2	2	1	6	2	1	0	1
UP000006299	1229758	Leuconostoc carnosum JB16	1690	1	0	3	1	0	0	0	1	0	0	1	0	2	1	0	0	0	1	1	0	0	0	0
UP000006304	1133849	Nocardia brasiliensis ATCC 700358	8414	1	1	1	5	1	1	1	1	0	1	10	10	27	24	0	8	12	11	28	1	0	0	3
UP000006315	1131731	Bacillus azotoformans LMG 9581	4207	1	0	1	4	1	0	1	0	0	0	2	6	4	3	0	0	3	1	7	4	3	0	0
UP000006316	1117379	Bacillus bataviensis LMG 21833	5206	0	0	0	2	1	0	1	0	0	0	5	7	12	11	0	2	2	1	12	2	0	0	0
UP000006321	1206781	Paenibacillus alvei DSM 29	6508	0	0	1	5	0	0	0	0	0	0	4	3	9	2	0	0	0	4	5	5	0	1	0
UP000006322	1129793	Paraglaciecola polaris LMG 21857	4728	1	0	1	4	1	0	2	0	0	0	4	2	11	11	0	1	4	1	13	2	1	0	0
UP000006327	493475	Paraglaciecola arctica BSs20135	5330	1	1	2	3	1	0	1	0	0	0	3	3	9	10	0	3	4	1	18	4	0	0	1
UP000006334	1127673	Aliiglaciecola lipolytica E3	4327	1	0	2	3	1	0	2	0	0	0	5	3	9	9	0	3	3	1	8	1	0	0	1
UP000006343	913338	actinobacterium SCGC AAA027-L06	1242	0	0	1	2	0	0	0	0	0	0	1	1	4	1	0	2	0	0	8	0	0	0	0
UP000006346	768706	Desulfosporosinus orientis DSM 765	5217	0	0	0	4	1	0	1	0	0	0	3	19	5	0	0	1	2	1	2	7	1	0	0
UP000006362	648996	Thermovibrio ammonificans HB-1	1812	1	0	2	3	1	1	0	0	0	0	5	0	0	0	0	0	0	1	2	1	0	0	0
UP000006365	577650	Desulfobulbus propionicus DSM 2032	3259	1	1	0	4	0	0	1	0	0	0	8	3	2	1	0	0	0	1	2	6	1	0	0
UP000006371	342451	Staphylococcus saprophyticus subsp. saprophyticus ATCC 15305	2404	1	0	1	1	0	0	0	0	0	0	1	3	5	2	0	0	0	1	6	0	0	0	0
UP000006375	290633	Gluconobacter oxydans 621H	2626	1	2	1	1	0	0	0	0	0	0	3	0	9	3	0	1	0	1	4	1	0	0	0
UP000006377	402881	Parvibaculum lavamentivorans DS-1	3580	1	1	1	3	0	0	1	0	0	1	3	5	19	13	1	0	9	1	9	1	0	0	0
UP000006378	387093	Sulfurovum sp. NBC37-1	2433	1	4	2	3	1	0	1	0	0	0	1	0	1	0	0	0	0	1	1	0	0	0	0
UP000006380	360105	Campylobacter curvus 525.92	1860	1	1	2	2	0	0	0	0	0	0	3	0	1	0	0	0	0	1	1	1	0	0	0
UP000006381	272621	Lactobacillus acidophilus NCFM	1859	0	0	0	1	1	0	1	0	0	0	2	1	1	3	0	0	0	0	1	0	0	0	0
UP000006382	404589	Anaeromyxobacter sp. Fw109-5	4461	1	1	1	2	1	1	0	1	0	1	12	3	6	11	0	0	3	1	3	0	1	0	0
UP000006388	375286	Janthinobacterium sp. Marseille	3695	1	1	1	3	0	0	0	0	0	0	2	2	6	5	1	1	1	3	3	0	0	0	0
UP000006394	402612	Flavobacterium psychrophilum JIP02/86	2421	1	0	2	2	0	0	0	0	0	1	4	3	1	2	0	1	0	1	2	1	1	0	0
UP000006408	518635	Bifidobacterium angulatum DSM 20098 = JCM 7096	1724	1	1	0	1	0	0	1	1	0	1	2	0	0	1	0	0	0	0	2	1	0	0	0
UP000006415	857290	Scardovia wiggsiae F0424	1242	1	0	1	2	0	0	1	1	0	1	2	1	1	2	0	0	1	0	0	1	0	0	0
UP000006420	742767	Dysgonomonas mossii DSM 22836	3424	1	0	2	3	1	0	2	0	0	0	3	0	1	0	0	0	1	3	2	1	0	0	0
UP000006424	665942	Desulfovibrio sp. 6_1_46AFAA	3312	1	0	1	2	0	0	1	0	0	0	1	0	2	0	0	0	0	3	4	3	0	0	0
UP000006427	469381	Dethiosulfovibrio peptidovorans DSM 11002	2432	1	0	1	1	1	0	1	0	0	0	2	1	4	1	0	0	0	1	2	5	0	0	0
UP000006431	929558	Sulfurimonas gotlandica GD1	2865	1	3	1	4	0	0	0	0	0	0	1	0	2	2	0	0	0	1	2	1	0	0	0
UP000006443	555088	Dethiobacter alkaliphilus AHT 1	3162	0	0	1	3	1	2	0	0	0	0	3	4	0	0	0	1	1	1	0	1	1	0	0
UP000006454	209882	Fusobacterium nucleatum subsp. vincentii ATCC 49256	2239	0	0	1	3	1	0	1	0	0	0	1	0	0	2	0	0	1	1	0	2	1	0	0
UP000006457	1095749	Pasteurella bettyae CCUG 2042	2177	0	0	1	1	0	0	0	0	0	0	1	0	2	2	0	0	0	1	2	2	0	0	0
UP000006461	477641	Modestobacter marinus	5435	1	3	1	1	0	0	1	3	1	1	13	3	14	20	1	3	4	2	9	0	0	0	0
UP000006462	352165	Pyramidobacter piscolens W5455	2755	0	0	1	3	0	0	0	0	0	0	3	1	3	1	0	0	0	1	0	4	1	0	0
UP000006464	471881	Proteus penneri ATCC 35198	4909	1	0	1	3	1	0	1	1	0	0	0	0	3	2	0	1	0	1	0	6	0	0	0
UP000006468	714995	Komagataeibacter hansenii ATCC 23769	3303	1	1	1	3	1	0	2	0	0	0	5	0	11	4	0	2	0	1	10	1	0	0	0
UP000006470	313598	Polaribacter sp. MED152	2634	0	2	1	4	0	0	1	0	1	1	2	2	6	3	0	1	1	1	5	0	0	0	0
UP000006480	1144307	Sphingobium sp. AP49	4212	1	2	1	3	0	0	1	0	0	0	4	6	9	7	1	4	2	1	14	0	1	0	0
UP000006502	1212765	Candidatus Mycoplasma haemolamae str. Purdue	923	0	0	0	0	0	0	0	0	0	0	0	0	0	0	0	0	0	0	1	0	0	0	0
UP000006512	715226	Asticcacaulis biprosthecum C19	4712	1	1	1	3	0	0	0	2	0	0	2	4	9	4	1	0	1	1	7	0	0	0	0
UP000006544	983545	Glaciecola sp. 4H-3-7+YE-5	4541	1	0	2	3	1	0	2	0	0	0	5	3	13	5	0	1	4	1	11	2	1	0	0
UP000006545	879243	Porphyromonas asaccharolytica DSM 20707	1672	1	0	1	1	1	0	1	0	0	0	2	0	1	0	0	0	0	1	1	1	2	0	0
UP000006546	906968	Treponema brennaborense DSM 12168	2522	1	0	1	2	1	1	0	0	0	0	2	0	1	0	0	0	0	1	1	2	0	0	0
UP000006552	76114	Aromatoleum aromaticum EbN1	4483	1	0	1	2	1	0	1	1	0	1	9	5	5	2	3	1	3	1	11	1	0	0	0
UP000006554	357808	Roseiflexus sp. RS-1	4494	1	1	1	9	2	1	0	0	0	0	25	4	6	7	0	3	1	1	5	1	1	0	2
UP000006556	370438	Pelotomaculum thermopropionicum SI	2884	0	0	1	4	1	1	0	0	0	0	8	0	0	0	0	0	0	1	0	1	0	0	0
UP000006559	362948	Lactobacillus salivarius UCC118	1998	0	0	1	3	0	0	1	0	0	0	4	0	6	0	0	0	0	1	2	1	0	0	0
UP000006575	216596	Rhizobium leguminosarum bv. viciae 3841	7091	1	3	1	4	0	0	3	0	0	0	5	4	38	13	1	5	5	1	27	5	0	0	0
UP000006578	317655	Sphingopyxis alaskensis RB2256	3184	1	1	1	0	0	0	0	0	0	0	2	6	11	3	0	0	2	1	9	0	0	0	0
UP000006582	452638	Polynucleobacter necessarius STIR1	1507	0	0	0	3	0	0	0	0	0	0	0	2	1	0	0	0	0	1	1	0	0	0	0
UP000006583	795359	Thermodesulfobacterium geofontis OPF15	1594	0	0	1	1	0	0	0	0	0	0	2	0	0	0	0	0	0	1	1	2	0	0	0
UP000006589	426355	Methylobacterium radiotolerans JCM 2831	6388	1	1	1	3	1	0	1	1	0	1	10	4	10	11	1	2	3	1	11	1	0	0	0
UP000006599	936594	Lachnoanaerobaculum sp. ICM7	2588	1	0	1	3	1	0	1	0	0	0	0	1	1	0	0	0	0	1	2	3	0	0	0
UP000006603	1156919	Achromobacter piechaudii HLE	6358	1	2	1	2	1	0	1	0	0	1	13	6	24	10	0	1	5	1	19	3	0	0	0
UP000006605	936556	Peptostreptococcaceae bacterium AS15	2299	0	0	1	3	1	0	1	0	0	0	0	1	0	0	0	0	0	1	2	2	1	0	0
UP000006608	985078	Burkholderia multivorans CF2	6608	1	2	1	4	0	0	1	0	0	1	7	7	21	12	2	0	3	3	34	2	0	0	0
UP000006621	717231	Flexistipes sinusarabici DSM 4947	2185	0	0	1	3	0	0	0	0	0	0	5	2	3	0	0	0	0	1	2	0	0	0	0
UP000006631	712898	Pantoea vagans C9-1	4590	1	0	2	2	1	0	1	1	0	0	2	0	7	6	0	1	0	2	9	6	0	0	0
UP000006633	639283	Starkeya novella DSM 506	4424	1	3	1	1	1	0	1	1	0	0	2	2	17	9	1	1	3	1	15	1	0	0	0
UP000006637	266117	Rubrobacter xylanophilus DSM 9941	3127	1	0	0	5	0	0	1	0	0	1	5	6	16	3	1	1	3	1	15	1	0	0	0
UP000006639	696127	Candidatus Midichloria mitochondrii IricVA	1181	0	0	1	1	0	0	0	0	0	0	0	0	1	0	0	0	0	1	0	0	0	0	0
UP000006640	469371	Thermobispora bispora DSM 43833	3545	0	0	1	2	0	0	1	2	1	1	7	4	5	5	0	0	4	1	11	1	0	0	0
UP000006647	265311	Mesoplasma florum L1	683	0	0	0	0	0	0	0	0	0	0	0	0	0	2	0	0	0	0	1	0	0	0	0
UP000006650	521097	Capnocytophaga ochracea DSM 7271	2171	1	0	1	2	0	0	1	0	0	0	2	0	2	1	0	1	0	1	2	0	1	0	0
UP000006654	526986	Bacillus cereus Rock3-44	4750	1	1	1	2	1	0	1	0	0	0	5	5	7	6	0	1	2	1	10	2	0	0	0
UP000006657	709991	Odoribacter splanchnicus DSM 20712	3479	1	0	1	3	0	0	1	0	0	0	1	0	0	1	0	0	0	2	1	2	2	0	0
UP000006659	858619	Corynebacterium variabile DSM 44702	2972	0	2	1	3	0	0	1	0	0	0	3	3	5	2	0	2	2	0	12	1	0	0	0
UP000006666	478801	Kytococcus sedentarius DSM 20547	2531	1	3	2	1	0	0	0	2	0	1	6	1	3	0	0	1	1	1	5	0	0	0	0
UP000006683	550540	Ferrimonas balearica DSM 9799	3781	1	1	2	1	0	0	0	0	0	0	2	1	2	3	1	0	1	1	5	3	0	0	1
UP000006691	1002809	Solibacillus silvestris StLB046	3812	1	1	1	1	0	0	0	0	0	0	4	7	9	3	0	0	3	2	8	3	1	0	0
UP000006694	376686	Flavobacterium johnsoniae UW101	5016	2	0	1	2	1	0	1	0	0	0	4	2	10	8	0	7	1	1	6	1	0	0	0
UP000006695	351605	Geobacter uraniireducens Rf4	4255	0	1	1	5	1	0	0	0	0	0	10	3	2	4	0	0	0	6	6	3	0	0	0
UP000006697	204773	Herminiimonas arsenicoxydans	3272	1	1	1	4	0	0	0	0	0	0	2	2	3	4	2	0	2	2	4	0	0	0	0
UP000006699	319224	Shewanella putrefaciens CN-32	3948	1	0	2	2	0	0	1	0	0	0	0	1	1	5	0	2	0	1	9	3	1	0	0
UP000006700	290318	Chlorobium phaeovibrioides DSM 265	1750	1	0	1	5	1	0	0	0	0	1	5	0	1	3	0	1	0	1	1	2	1	0	0
UP000006728	405948	Saccharopolyspora erythraea NRRL 2338	7154	1	1	2	3	1	1	0	1	0	0	7	6	20	20	0	4	4	10	20	0	0	0	1
UP000006731	272559	Bacteroides fragilis NCTC 9343	4234	2	0	1	7	1	0	1	0	0	0	4	0	4	0	0	0	1	1	0	2	0	0	0
UP000006732	338966	Pelobacter propionicus DSM 2379	3694	1	0	1	4	1	0	0	0	0	0	6	0	1	2	0	0	0	4	5	2	0	0	0
UP000006735	291331	Xanthomonas oryzae pv. oryzae KACC 10331	4382	1	1	1	2	1	0	2	0	0	1	3	1	4	3	0	0	0	1	5	0	0	0	0
UP000006742	548479	Mobiluncus curtisii ATCC 43063	1904	1	1	1	2	0	0	1	0	0	1	0	0	2	2	0	0	0	0	5	0	0	0	0
UP000006743	557723	Glaesserella parasuis SH0165	2002	0	0	1	1	1	0	1	0	0	0	0	0	1	1	0	0	0	1	2	0	0	0	0
UP000006746	1207063	Oceanibaculum indicum P24	3754	1	1	1	3	0	0	0	0	0	0	3	1	16	4	0	1	6	3	6	2	0	0	0
UP000006755	745411	Gallaecimonas xiamenensis 3-C-1	3798	1	1	2	1	0	0	0	0	0	0	0	2	6	6	1	0	1	2	7	2	0	0	0
UP000006762	1208323	Celeribacter baekdonensis B30	4198	0	3	1	2	0	0	1	0	0	0	0	6	13	2	3	2	2	1	17	1	0	0	0
UP000006764	391936	Alcanivorax pacificus W11-5	3686	1	0	1	1	0	0	0	0	0	0	1	4	6	8	0	3	3	1	7	1	0	0	1
UP000006765	1231392	Oceaniovalibus guishaninsula JLT2003	2840	1	1	1	1	0	0	1	1	0	1	0	5	8	2	1	1	1	1	7	1	0	0	0
UP000006786	391937	Nitratireductor pacificus pht-3B	4196	1	1	1	0	0	0	0	0	0	0	0	3	10	8	0	1	6	1	15	1	0	0	0
UP000006787	1231377	Lactococcus garvieae DCC43	2223	0	0	0	3	1	0	1	1	0	0	1	1	4	2	0	0	0	1	0	1	0	0	0
UP000006791	981222	Chloracidobacterium thermophilum B	3053	0	0	0	5	0	1	0	0	0	0	4	3	4	5	0	1	1	1	2	0	0	0	0
UP000006793	667014	Thermodesulfatator indicus DSM 15286	2184	0	0	1	3	1	0	0	0	0	0	7	0	0	0	0	0	0	1	0	0	0	0	0
UP000006799	1116375	Vibrio sp. EJY3	4783	1	1	2	1	1	0	1	0	0	0	7	1	4	8	1	0	1	2	19	7	0	0	0
UP000006800	882102	Vibrio anguillarum 775	3722	1	0	2	3	1	0	1	1	0	0	0	0	3	3	0	0	1	1	6	3	0	0	0
UP000006801	1097668	Burkholderia sp. YI23	7767	1	4	1	2	2	0	1	1	0	0	8	7	35	23	1	2	12	2	39	7	0	0	0
UP000006803	696747	Arthrospira platensis NIES-39	6009	1	0	0	6	2	1	1	1	0	0	4	0	2	7	0	2	0	1	4	2	0	0	0
UP000006804	688269	Pseudothermotoga thermarum DSM 5069	1928	0	0	1	3	1	1	0	0	0	0	2	0	2	0	0	0	0	1	1	2	1	0	0
UP000006810	496833	Mycoplasma fermentans PG18	891	0	0	0	0	0	0	0	1	0	0	1	0	0	1	0	0	0	0	1	0	0	0	0
UP000006811	261317	Buchnera aphidicola (Cinara tujafilina)	359	0	0	0	0	0	0	0	0	0	0	0	0	0	0	0	0	0	1	0	0	0	0	0
UP000006820	247156	Nocardia farcinica IFM 10152	5941	1	1	0	2	1	1	1	1	0	1	8	7	16	10	0	8	7	4	20	2	0	0	2
UP000006821	243233	Methylococcus capsulatus str. Bath	2925	1	0	1	2	2	0	1	0	0	1	8	0	1	0	0	1	0	1	2	0	0	0	0
UP000006833	398580	Dinoroseobacter shibae DFL 12 = DSM 16493	4086	1	2	1	1	0	0	0	0	0	0	1	4	14	5	2	2	2	2	11	0	0	0	0
UP000006838	323261	Nitrosococcus oceani ATCC 19707	2995	1	0	1	2	2	1	1	0	0	1	8	1	2	5	0	0	0	1	3	0	0	0	0
UP000006843	326442	Pseudoalteromonas haloplanktis TAC125	3484	0	0	1	1	0	0	0	0	0	0	0	3	2	6	0	2	2	1	9	1	0	0	0
UP000006844	401053	Terriglobus saanensis SP1PR4	4177	1	1	0	4	1	1	0	0	0	1	8	0	14	9	0	5	1	1	2	1	0	0	0
UP000006851	700015	Coriobacterium glomerans PW2	1768	1	0	1	2	0	0	1	0	0	0	1	0	2	0	0	0	0	0	1	4	0	0	0
UP000006852	869209	Treponema succinifaciens DSM 2489	2561	1	0	1	1	0	1	0	0	0	0	0	0	0	0	0	0	0	1	0	2	0	0	0
UP000006854	953739	Streptomyces venezuelae ATCC 10712	7451	1	1	2	6	0	0	1	2	1	1	11	8	12	8	0	2	5	3	19	1	0	0	1
UP000006859	198628	Dickeya dadantii 3937	4532	1	0	2	3	1	0	1	0	0	0	4	0	3	5	0	1	1	2	9	8	0	0	0
UP000006860	756272	Rubinisphaera brasiliensis DSM 5305	4710	1	1	1	2	1	0	1	0	0	0	11	0	9	5	0	0	0	1	7	2	0	0	0
UP000006866	572479	Halanaerobium praevalens DSM 2228	2055	0	0	1	2	1	0	1	0	0	0	3	2	1	0	0	0	1	1	0	3	0	0	0
UP000006867	720555	Bacillus atrophaeus 1942	4186	0	0	0	3	1	0	1	0	0	0	4	2	10	7	0	0	1	5	10	5	0	0	0
UP000006868	886882	Paenibacillus polymyxa SC2	5377	1	1	0	4	1	0	1	0	0	0	4	1	13	5	0	2	1	5	3	5	0	0	0
UP000006871	880591	Ketogulonicigenium vulgare Y25	3209	1	0	0	2	1	0	1	0	0	0	0	0	8	4	0	3	0	1	6	0	0	0	0
UP000006872	701347	Enterobacter lignolyticus SCF1	4393	1	1	2	2	1	0	1	0	0	0	2	2	6	3	0	0	1	1	14	6	0	0	0
UP000006873	903814	Eubacterium limosum KIST612	4506	1	0	2	3	1	0	2	0	0	0	4	1	4	0	0	0	0	1	1	11	1	0	0
UP000006875	572544	Ilyobacter polytropus DSM 2926	2859	1	0	2	5	1	0	1	0	0	0	1	0	2	0	0	1	2	1	1	7	0	0	0
UP000006876	762376	Achromobacter xylosoxidans A8	6798	1	2	1	2	1	0	1	0	0	1	14	9	33	9	1	0	19	1	21	5	0	0	0
UP000006878	861360	Glutamicibacter arilaitensis Re117	3380	1	2	2	1	0	0	1	1	0	0	0	5	4	4	0	0	3	1	11	0	0	0	0
UP000006889	632518	Caldicellulosiruptor owensensis OL	2133	0	0	0	2	2	0	1	0	0	0	4	0	2	0	0	0	0	1	0	2	0	0	0
UP000006898	671143	Candidatus Methylomirabilis oxyfera	3057	0	0	0	3	1	0	1	0	0	0	6	1	1	1	0	0	0	1	3	0	0	0	0
UP000006908	1005058	Gallibacterium anatis UMN179	2482	1	0	1	2	1	0	0	0	0	0	1	0	2	2	0	0	0	1	6	2	0	0	0
UP000006910	712938	Lactobacillus fermentum CECT 5716	1043	1	0	1	2	0	0	0	0	0	0	2	1	2	1	0	0	0	1	1	1	0	0	0
UP000006919	697329	Ruminococcus albus 7 = DSM 20455	3775	1	0	0	4	2	0	2	0	0	0	0	0	0	0	0	0	0	1	2	2	0	0	0
UP000006974	1078483	Haemophilus sputorum HK 2154	1985	0	0	1	1	1	0	1	0	0	0	0	0	1	1	0	0	0	1	3	1	0	0	0
UP000006984	936572	Selenomonas sp. FOBRC6	2304	0	0	1	5	1	0	1	0	0	0	0	0	2	0	0	0	1	1	1	0	1	0	0
UP000007006	1147128	Bifidobacterium asteroides PRL2011	1656	1	0	0	1	0	0	0	1	0	0	4	0	2	1	0	0	0	0	3	1	0	0	0
UP000007013	452637	Opitutus terrae PB90-1	4588	1	0	1	1	1	0	1	0	0	1	10	0	2	1	0	0	0	2	5	0	0	0	0
UP000007029	375451	Roseobacter denitrificans OCh 114	4118	1	2	1	1	1	0	1	0	0	0	1	4	12	4	1	1	3	1	7	3	0	0	0
UP000007030	869210	Marinithermus hydrothermalis DSM 14884	2194	0	0	0	5	0	0	0	0	0	0	6	3	4	1	0	0	1	1	5	0	0	0	0
UP000007032	537970	Helicobacter canadensis MIT 98-5491	1535	1	1	2	3	0	0	0	0	0	0	2	0	1	0	0	0	0	1	1	0	0	0	0
UP000007038	658172	Candidatus Liberibacter solanacearum CLso-ZC1	1164	0	0	0	2	0	0	0	0	0	0	0	0	2	0	0	0	0	1	0	0	0	0	0
UP000007039	768670	Calditerrivibrio nitroreducens DSM 19672	2089	1	0	3	4	1	1	0	0	0	0	4	2	3	0	0	0	0	1	2	1	0	0	0
UP000007041	499177	Acetoanaerobium sticklandii DSM 519	2572	1	0	2	3	1	0	1	0	0	0	0	1	1	0	0	0	0	1	2	0	0	0	0
UP000007052	862965	Haemophilus parainfluenzae T3T1	1973	0	0	1	1	1	0	1	0	0	0	0	0	1	3	0	0	0	1	3	1	0	0	0
UP000007053	264732	Moorella thermoacetica ATCC 39073	2451	0	0	1	3	1	2	0	0	0	0	4	1	1	0	0	0	0	1	0	3	0	0	0
UP000007054	213810	Ruminococcus champanellensis 18P13 = JCM 17042	2114	1	0	0	2	0	0	2	0	0	0	1	0	0	0	0	0	0	2	1	2	0	0	0
UP000007058	342108	Magnetospirillum magneticum AMB-1	4514	1	1	1	6	1	0	1	0	0	0	5	5	4	1	0	0	4	2	6	0	0	0	0
UP000007059	657322	Faecalibacterium prausnitzii SL3/3	2744	2	0	0	1	1	0	2	0	0	0	1	0	1	0	0	0	0	1	0	2	0	0	0
UP000007065	347257	Mycoplasma agalactiae PG2	726	0	0	0	0	0	0	0	0	0	0	0	0	0	3	0	0	0	0	0	0	0	0	0
UP000007073	269799	Geobacter metallireducens GS-15	3502	1	1	1	3	2	0	0	0	0	0	5	5	6	1	0	0	1	2	5	0	4	0	0
UP000007076	452652	Kitasatospora setae KM-6054	7443	1	1	2	7	0	0	1	3	2	1	13	5	20	12	0	1	6	7	17	1	0	0	0
UP000007093	568816	Acidaminococcus intestini RyC-MR95	2386	1	0	2	2	0	0	0	0	0	0	0	2	0	0	0	0	0	1	2	2	0	0	0
UP000007102	868864	Desulfurobacterium thermolithotrophum DSM 11699	1496	1	0	2	2	0	0	0	0	0	0	4	0	0	0	0	0	0	1	2	1	0	0	0
UP000007106	748247	Azoarcus sp. KH32C	5176	1	1	1	4	1	0	0	0	0	0	13	10	18	5	3	5	4	1	17	0	1	0	0
UP000007112	1075399	Blattabacterium sp. (Cryptocercus punctulatus) str. Cpu	548	0	0	0	1	0	0	0	0	0	0	0	0	0	0	0	0	0	1	1	0	0	0	0
UP000007113	682795	Granulicella mallensis MP5ACTX8	4804	1	1	0	5	0	1	0	0	0	1	9	1	12	12	0	8	1	2	5	0	0	0	0
UP000007123	1156935	Agrobacterium albertimagni AOL15	4811	1	2	1	1	1	0	1	0	0	0	1	3	13	6	1	3	3	2	11	3	0	0	0
UP000007127	1123366	Thalassospira xiamenensis M-5 = DSM 17429	4340	1	1	1	3	0	0	0	0	0	0	2	3	10	1	0	3	1	2	15	2	0	0	0
UP000007136	441620	Methylobacterium populi BJ001	5325	1	1	1	4	1	0	1	0	0	0	9	2	6	5	1	3	2	2	5	0	0	0	0
UP000007150	690566	Sphingobium chlorophenolicum L-1	4062	1	1	1	2	0	0	1	0	0	0	4	16	30	3	0	0	5	1	26	3	0	0	0
UP000007161	443254	Marinitoga piezophila KA3	2044	0	0	0	4	1	1	1	1	0	0	1	0	1	0	0	0	1	1	1	2	0	0	0
UP000007170	1133850	Streptomyces hygroscopicus subsp. jinggangensis 5008	9046	1	3	3	5	0	0	3	4	2	2	8	7	25	29	0	4	7	5	26	4	0	0	1
UP000007177	931626	Acetobacterium woodii DSM 1030	3445	1	0	2	5	1	0	1	0	0	0	0	0	4	1	0	0	0	1	3	11	0	0	0
UP000007254	869211	Spirochaeta thermophila DSM 6578	2249	1	0	1	0	1	1	0	0	0	0	5	0	3	1	0	1	0	1	1	2	0	0	0
UP000007271	1185325	Lactobacillus coryniformis subsp. coryniformis CECT 5711	2023	1	0	1	2	0	0	0	0	0	0	1	0	5	2	0	0	0	1	5	2	0	0	0
UP000007275	1144318	Polaromonas sp. CF318	4751	1	2	1	3	0	0	0	0	0	0	2	5	9	4	1	1	1	1	13	2	0	0	0
UP000007277	1144315	Variovorax sp. CF313	5597	1	2	1	2	0	0	2	0	0	1	1	9	16	10	1	3	6	2	14	2	0	0	0
UP000007282	1144708	Pseudomonas sp. GM41(2012)	5964	1	1	2	3	1	0	1	0	0	1	2	6	12	17	0	1	4	2	29	6	0	0	0
UP000007283	1144343	Phyllobacterium sp. YR531	4844	1	1	1	2	0	0	0	0	0	0	2	2	21	6	1	2	5	1	17	0	0	0	0
UP000007287	1144313	Flavobacterium sp. CF136	4319	1	0	1	2	1	0	1	0	0	0	3	2	6	2	0	2	1	1	6	1	0	0	0
UP000007291	1038921	Pseudomonas chlororaphis subsp. aureofaciens 30-84	5848	1	2	2	3	1	0	1	0	0	1	3	4	8	10	0	2	3	2	27	2	0	0	0
UP000007296	1144319	Herbaspirillum sp. CF444	4973	1	2	1	6	0	0	0	0	0	0	2	4	16	11	1	1	2	3	14	3	0	0	0
UP000007307	320483	Anaplasma marginale str. Florida	939	0	0	0	0	0	0	0	0	0	0	0	0	1	0	0	0	0	1	0	0	0	0	0
UP000007319	1064539	Azospirillum brasilense Sp245	7541	1	3	0	2	1	0	1	1	0	0	4	3	14	7	0	0	8	1	14	2	0	0	0
UP000007332	1071400	Lactobacillus buchneri CD034	2369	1	0	3	1	0	0	0	0	0	0	1	1	4	1	0	1	0	1	3	1	0	0	0
UP000007347	651182	Desulfobacula toluolica Tol2	4189	0	0	0	4	0	0	1	0	0	0	2	5	0	2	0	1	1	2	1	2	3	0	0
UP000007364	555500	Galbibacter marinus	3099	1	0	1	3	0	0	0	0	0	0	4	2	8	2	0	1	0	1	5	1	0	0	0
UP000007374	1231190	Nitratireductor indicus C115	4821	1	1	1	0	0	0	0	0	0	0	0	2	17	5	3	1	5	1	18	0	0	0	0
UP000007382	1162668	Leptospirillum ferrooxidans C2-3	2413	0	0	1	1	0	1	0	2	1	1	3	0	1	0	0	0	0	1	1	0	0	0	0
UP000007383	889378	Spirochaeta africana DSM 8902	2766	1	0	1	1	1	1	0	0	0	0	1	0	0	2	0	4	0	1	2	1	0	0	0
UP000007384	771875	Fervidobacterium pennivorans DSM 9078	1920	0	0	0	4	1	1	0	1	0	0	1	0	1	1	0	0	1	1	0	4	0	0	0
UP000007394	945713	Ignavibacterium album JCM 16511	3169	1	0	0	1	1	0	0	0	0	0	7	1	2	3	0	2	0	1	1	0	1	0	0
UP000007397	866895	Halobacillus halophilus DSM 2266	4100	1	0	1	1	1	0	1	0	0	0	6	6	14	4	0	2	2	1	12	3	0	0	0
UP000007434	656519	Arthrobacter alpinus	2250	0	0	1	3	1	0	1	0	0	0	2	0	4	1	0	1	0	1	2	5	0	0	0
UP000007435	649349	Leadbetterella byssophila DSM 17132	3429	1	0	2	2	0	0	1	0	1	0	7	2	7	0	0	1	2	1	6	0	0	0	0
UP000007437	882378	Paraburkholderia rhizoxinica HKI 454	3859	0	0	1	3	0	0	0	0	0	0	0	2	3	4	1	0	0	1	6	0	1	0	0
UP000007456	903510	Vibrio furnissii NCTC 11218	4440	1	1	2	2	1	0	1	0	0	0	2	0	3	8	1	1	1	1	12	5	0	0	0
UP000007460	488538	Candidatus Puniceispirillum marinum IMCC1322	2545	0	1	1	2	0	0	0	0	0	0	6	1	7	2	0	1	1	1	14	1	0	0	0
UP000007463	755732	Fluviicola taffensis DSM 16823	4016	1	0	2	3	0	0	0	0	0	0	7	2	3	2	0	0	1	1	5	1	0	0	0
UP000007468	546269	Filifactor alocis ATCC 35896	1616	0	0	2	1	0	0	0	0	0	0	0	1	0	1	0	0	1	1	2	2	1	0	0
UP000007471	765698	Mesorhizobium ciceri biovar biserrulae WSM1271	6260	1	2	1	3	1	0	1	0	0	0	2	2	26	15	1	3	6	1	23	1	0	0	0
UP000007472	937774	Taylorella equigenitalis MCE9	1556	0	1	1	2	0	0	0	0	0	0	0	0	1	0	0	0	0	1	4	0	0	0	0
UP000007477	871585	Acinetobacter pittii PHEA-2	3598	1	0	1	2	0	0	0	0	0	0	3	2	10	11	0	3	3	2	20	2	0	0	1
UP000007484	768700	Mycoplasma suis str. Illinois	844	0	0	0	0	0	0	0	0	0	0	0	0	0	0	0	0	0	0	1	0	0	0	0
UP000007486	667015	Bacteroides salanitronis DSM 18170	3608	1	0	1	2	1	0	1	0	0	0	4	0	4	0	0	0	1	1	0	2	0	0	0
UP000007487	867900	Cellulophaga lytica DSM 7489	3281	2	0	1	2	0	0	0	0	0	1	1	2	5	1	0	1	0	1	10	2	1	0	0
UP000007488	645991	Syntrophobotulus glycolicus DSM 8271	3105	1	1	2	4	0	0	0	0	0	0	3	0	0	0	0	0	2	1	1	2	0	0	0
UP000007505	1144310	Rhizobium sp. CF080	6670	1	2	1	4	1	0	2	1	0	0	6	3	24	9	1	2	3	3	29	4	0	0	0
UP000007507	1144342	Herbaspirillum sp. YR522	4612	1	2	1	2	1	0	2	0	0	0	1	3	17	9	1	2	5	2	12	4	0	0	0
UP000007509	1144316	Chryseobacterium sp. CF314	4113	1	0	1	3	1	0	1	0	0	0	5	4	7	4	0	2	2	1	5	1	1	0	0
UP000007515	1144305	Novosphingobium sp. AP12	5212	1	1	1	4	0	0	1	0	0	0	10	5	23	21	1	10	2	2	11	0	1	0	0
UP000007516	100901	Wolbachia endosymbiont of Onchocerca ochengi	647	0	0	0	0	0	0	0	0	0	0	0	0	1	0	0	1	0	1	1	0	0	0	0
UP000007517	1146883	Blastococcus saxobsidens DD2	4791	1	1	0	2	0	0	1	4	1	1	13	4	7	10	0	1	7	1	11	2	0	0	1
UP000007519	984262	Saprospira grandis str. Lewin	4218	1	0	0	3	0	0	0	0	0	0	3	3	3	4	0	1	1	1	4	0	0	0	0
UP000007523	1116391	Paenibacillus mucilaginosus 3016	7018	1	1	1	6	1	0	1	1	0	0	7	2	21	9	0	4	1	4	6	3	0	0	0
UP000007575	745776	Deinococcus gobiensis I-0	4329	1	1	0	2	1	0	1	1	0	0	5	4	6	4	0	1	1	1	4	0	0	0	0
UP000007587	1144275	Corallococcus coralloides DSM 2259	8019	1	2	2	4	1	1	1	3	1	2	10	5	15	15	0	2	5	17	12	0	0	0	0
UP000007590	929556	Solitalea canadensis DSM 3403	4304	2	2	1	2	0	0	1	0	0	0	2	2	4	2	0	2	0	1	4	2	1	0	0
UP000007599	1094466	Flavobacterium indicum GPTSA100-9 = DSM 17447	2649	1	0	1	2	0	0	0	0	0	0	3	2	0	1	0	2	0	1	2	1	1	0	0
UP000007652	857293	Caloramator australicus RC3	2679	0	0	0	3	1	0	1	0	0	0	2	1	0	1	0	0	0	1	0	1	0	0	0
UP000007718	693977	Deinococcus proteolyticus MRP	2652	1	1	0	2	1	0	1	0	0	0	3	2	4	5	0	0	1	1	4	0	0	0	0
UP000007719	515635	Dictyoglomus turgidum DSM 6724	1743	0	0	0	2	1	1	0	0	0	0	3	0	3	0	0	0	0	1	1	3	0	0	0
UP000007721	316067	Geobacter daltonii FRC-32	3798	0	0	1	4	1	0	0	0	0	1	3	3	3	4	0	0	0	2	4	2	4	0	0
UP000007727	306263	Campylobacter lari RM2100	1545	1	0	2	2	0	0	0	0	0	0	1	0	1	0	0	0	0	1	1	0	0	0	0
UP000007730	504832	Oligotropha carboxidovorans OM5	3624	1	1	1	2	0	0	1	0	0	1	5	2	8	2	2	0	1	2	6	0	0	0	0
UP000007742	511062	Oceanimonas sp. GK1	3190	1	0	2	3	0	0	0	0	0	0	0	1	2	2	0	0	0	1	16	1	0	0	0
UP000007753	452662	Sphingobium japonicum UT26S	4347	1	1	1	1	0	0	1	0	0	0	10	11	16	3	0	0	4	1	11	1	0	0	0
UP000007794	291272	Candidatus Blochmannia pennsylvanicus str. BPEN	610	0	0	0	1	0	0	0	0	0	0	0	0	1	0	0	0	0	1	0	0	0	0	0
UP000007803	563040	Sulfurimonas autotrophica DSM 16294	2155	1	1	1	6	2	0	1	0	0	0	0	0	1	1	0	0	0	1	2	0	0	0	0
UP000007808	743722	Sphingobacterium sp. 21	5132	2	1	1	2	1	0	2	1	0	1	6	2	13	5	0	3	2	2	7	2	0	0	0
UP000007809	675635	Pseudonocardia dioxanivorans CB1190	6620	1	4	0	3	1	1	1	2	1	1	8	11	20	18	1	3	12	1	14	6	0	0	1
UP000007838	1045856	Enterobacter cloacae EcWSU1	4617	1	1	2	2	1	0	1	1	0	0	3	2	16	7	0	1	1	2	10	3	0	0	0
UP000007841	1125630	Klebsiella pneumoniae subsp. pneumoniae HS11286	5728	1	1	2	3	0	0	1	1	0	0	2	2	16	5	0	0	1	3	16	9	0	0	0
UP000007842	1003195	Streptomyces cattleya NRRL 8057 = DSM 46488	7537	1	0	2	7	0	0	2	3	2	1	2	7	20	11	0	4	4	8	16	1	0	0	0
UP000007843	1006551	Klebsiella michiganensis KCTC 1686	5483	1	0	2	2	1	0	1	1	0	0	3	3	13	9	0	0	1	2	14	11	0	0	0
UP000007844	690850	Desulfovibrio africanus str. Walvis Bay	3699	0	0	0	2	1	0	2	0	0	1	8	0	2	1	0	0	0	1	2	2	0	0	0
UP000007845	641491	Desulfovibrio desulfuricans ND132	3451	0	0	0	2	1	0	0	0	0	0	7	0	1	2	0	0	0	1	3	2	0	0	0
UP000007880	926550	Caldilinea aerophila DSM 14535 = NBRC 104270	4097	2	1	1	5	2	0	1	0	0	0	13	2	14	2	0	2	4	1	3	2	1	0	0
UP000007881	1142394	Phycisphaera mikurensis NBRC 102666	3269	1	1	0	4	0	1	0	0	0	0	5	0	4	0	0	2	0	1	4	0	0	0	0
UP000007882	512565	Actinoplanes missouriensis 431	8113	1	4	2	3	1	0	1	3	1	1	11	6	15	20	0	3	5	2	20	1	0	0	0
UP000007883	983917	Rubrivivax gelatinosus IL144	4686	2	2	1	2	1	0	2	0	0	0	7	8	10	8	2	1	6	2	5	3	0	0	1
UP000007886	335659	Bradyrhizobium sp. S23321	6897	1	2	1	0	2	0	1	1	0	1	7	7	24	18	2	3	7	3	8	3	0	0	0
UP000007887	927704	Selenomonas ruminantium subsp. lactilytica TAM6421	3481	0	0	1	5	1	0	2	0	0	0	3	0	4	0	0	0	0	1	1	2	0	0	0
UP000007934	936155	Helicobacter felis ATCC 49179	1649	1	0	1	0	0	0	0	0	0	0	1	1	0	0	0	0	2	1	2	0	0	0	0
UP000007938	596154	Alicycliphilus denitrificans K601	4620	1	2	1	3	0	0	0	0	0	0	4	11	16	1	2	3	13	1	14	0	0	0	0
UP000007939	760011	Sphaerochaeta coccoides DSM 17374	1819	0	0	0	0	0	1	0	0	0	0	1	0	4	0	0	0	0	1	2	2	0	0	0
UP000007944	650150	Erysipelothrix rhusiopathiae str. Fujisawa	1679	0	0	0	1	0	0	0	0	0	0	1	1	1	0	0	0	0	0	2	0	0	0	0
UP000007947	1032480	Microlunatus phosphovorus NM-1	5305	1	3	1	2	0	0	1	2	1	1	5	1	11	7	0	1	3	2	13	0	0	0	1
UP000007952	859194	Mycoplasma haemofelis Ohio2	1524	0	0	0	0	0	0	0	0	0	0	0	0	0	0	0	0	0	0	1	0	0	0	0
UP000007962	471853	Beutenbergia cavernae DSM 12333	4195	1	1	1	2	0	0	1	1	1	1	4	2	8	6	0	1	3	1	8	0	0	0	0
UP000007966	218491	Pectobacterium atrosepticum SCRI1043	4459	1	0	2	3	1	0	1	0	0	0	1	2	8	5	0	0	0	1	6	5	0	0	0
UP000007967	479435	Kribbella flavida DSM 17836	6940	1	1	2	2	0	0	1	5	1	1	6	3	14	27	0	7	4	3	12	1	0	0	0
UP000007968	479436	Veillonella parvula DSM 2008	1843	1	0	3	1	0	0	0	0	0	0	0	1	1	1	0	0	0	1	1	3	0	0	0
UP000008005	1105111	Rickettsia amblyommatis str. GAT-30V	1377	0	0	1	1	0	0	0	0	0	0	1	1	1	0	0	0	0	1	1	0	0	0	0
UP000008043	1214101	Streptomyces davaonensis JCM 4913	8553	1	1	2	8	0	0	2	3	2	2	8	8	21	16	0	2	6	13	21	2	0	0	1
UP000008074	595499	Candidatus Sulcia muelleri SMDSEM	242	0	0	0	0	0	0	0	0	0	0	0	0	0	0	0	0	0	0	1	0	0	0	0
UP000008075	406817	Xenorhabdus nematophila ATCC 19061	4439	1	0	2	2	0	0	0	0	0	0	4	0	5	3	0	1	0	5	8	2	0	0	0
UP000008080	264462	Bdellovibrio bacteriovorus HD100	3583	1	0	3	4	0	0	0	0	0	0	0	2	3	3	0	1	1	2	6	0	0	0	0
UP000008087	743525	Thermus scotoductus SA-01	2447	1	0	1	2	1	1	0	0	0	0	4	2	4	1	0	0	2	1	4	0	1	0	0
UP000008129	866775	Aerococcus urinae ACS-120-V-Col10a	1684	1	1	1	2	0	0	0	0	0	0	2	0	2	0	0	0	1	1	4	0	0	0	0
UP000008130	991905	Polymorphum gilvum SL003B-26A1	4354	1	2	2	3	0	0	0	0	0	0	2	3	10	4	3	1	7	2	18	2	0	0	0
UP000008139	760142	Hippea maritima DSM 10411	1653	0	0	0	4	2	0	1	0	0	0	3	1	0	0	0	0	1	1	3	0	0	0	0
UP000008140	695562	Lactobacillus amylovorus GRL1118	1913	1	0	0	2	1	0	1	0	0	0	3	1	0	3	0	0	0	0	1	0	0	0	0
UP000008148	290338	Citrobacter koseri ATCC BAA-895	5019	1	0	2	2	1	0	1	0	0	0	0	2	6	5	0	0	0	5	10	7	0	0	0
UP000008152	338187	Vibrio campbellii ATCC BAA-1116	5605	1	1	2	3	1	0	1	0	0	0	4	1	2	7	1	0	1	1	7	3	0	0	0
UP000008178	585394	Roseburia hominis A2-183	3351	1	0	1	4	2	0	1	0	0	0	0	1	2	2	0	0	0	1	0	1	0	0	0
UP000008183	243274	Thermotoga maritima MSB8	1852	0	0	1	2	1	0	0	0	0	0	3	0	3	0	0	0	0	1	1	4	0	0	0
UP000008186	211586	Shewanella oneidensis MR-1	4068	0	0	2	2	0	0	1	0	0	0	1	1	1	7	0	3	0	2	6	2	0	0	0
UP000008190	1127134	Nocardia cyriacigeorgica GUH-2	5473	1	1	1	2	1	1	1	1	0	1	6	8	11	15	0	3	10	6	18	0	0	0	3
UP000008191	1069533	Streptococcus infantarius subsp. infantarius CJ18	1874	0	0	0	2	0	0	0	0	0	0	1	0	1	0	0	0	0	1	2	1	0	0	0
UP000008204	41431	Cyanothece sp. PCC 8801	4335	1	0	0	5	3	1	2	0	0	0	6	0	4	7	0	0	0	4	3	1	0	0	0
UP000008206	497965	Cyanothece sp. PCC 7822	6559	1	1	0	4	1	1	2	0	0	0	5	1	8	8	0	1	0	2	5	1	1	0	0
UP000008207	460265	Methylobacterium nodulans ORS 2060	8128	1	2	1	4	1	0	1	1	0	0	6	7	22	8	2	2	8	2	18	5	0	0	0
UP000008210	381666	Ralstonia eutropha H16	6614	2	5	1	4	0	0	1	0	0	0	6	12	23	17	1	3	12	1	27	6	1	0	0
UP000008212	243275	Treponema denticola ATCC 35405	2753	0	0	0	1	1	1	0	0	0	0	3	0	0	0	0	0	0	1	2	1	0	0	0
UP000008220	386415	Clostridium novyi NT	2305	0	0	0	4	2	1	0	0	0	0	2	2	0	0	0	0	0	1	1	3	0	0	0
UP000008221	351607	Acidothermus cellulolyticus 11B	2157	0	0	0	5	0	0	1	1	1	1	7	2	4	2	0	0	1	1	9	0	0	0	1
UP000008229	469383	Conexibacter woesei DSM 14684	5912	1	1	2	5	1	1	0	0	0	0	4	7	34	20	0	3	7	1	26	2	0	0	0
UP000008234	699246	Mageeibacillus indolicus UPII9-5	1566	0	0	0	3	1	0	1	0	0	0	0	0	2	1	0	0	0	0	1	1	0	0	0
UP000008289	243164	Dehalococcoides mccartyi 195	1502	0	0	0	4	0	0	0	0	0	0	1	0	2	1	0	0	1	1	1	1	0	0	0
UP000008290	983548	Dokdonia sp. 4H-3-7-5	2978	2	0	1	3	1	0	1	0	0	0	3	2	2	2	0	0	0	2	7	1	0	0	0
UP000008291	292415	Thiobacillus denitrificans ATCC 25259	2826	1	1	1	3	1	0	1	0	0	0	5	0	2	2	0	1	0	1	0	0	0	0	0
UP000008297	983544	Lacinutrix sp. 5H-3-7-4	2958	2	0	1	2	1	0	1	0	0	1	4	2	3	5	0	2	1	1	8	2	0	0	0
UP000008308	263358	Verrucosispora maris AB-18-032	5998	1	0	1	2	2	0	1	1	0	1	8	4	10	11	0	4	5	4	16	1	0	0	0
UP000008315	1091494	Methylomicrobium alcaliphilum 20Z	4041	2	0	1	3	2	1	2	0	0	1	5	1	1	4	0	2	0	1	4	0	0	0	0
UP000008316	999541	Burkholderia gladioli BSR3	7351	1	2	1	4	1	0	1	0	0	0	9	7	25	22	2	6	5	8	36	4	0	0	0
UP000008319	529507	Proteus mirabilis HI4320	3661	1	0	2	2	0	0	0	0	0	0	4	0	4	3	0	1	0	2	5	5	0	0	0
UP000008320	205920	Ehrlichia chaffeensis str. Arkansas	1100	0	0	0	0	0	0	0	0	0	0	0	0	1	0	0	0	0	1	1	0	0	0	0
UP000008323	59748	Candidatus Phytoplasma australiense	633	0	0	0	0	0	0	0	0	0	0	0	0	0	0	0	0	0	0	0	0	0	0	0
UP000008326	290400	Jannaschia sp. CCS1	4271	1	2	1	2	0	0	1	0	0	0	0	5	10	9	1	0	2	1	14	1	0	0	0
UP000008332	338969	Rhodoferax ferrireducens T118	4401	1	0	1	4	0	0	1	0	0	1	3	9	12	3	1	3	4	2	13	3	1	0	0
UP000008363	1108045	Gordonia rhizosphera NBRC 16068	5930	1	4	1	3	1	1	1	1	0	1	6	16	30	17	1	3	16	2	34	2	0	0	3
UP000008366	1184609	Kineosphaera limosa NBRC 100340	4422	1	3	1	3	0	0	1	1	0	2	7	3	6	7	1	0	2	1	10	0	0	0	1
UP000008385	365046	Ramlibacter tataouinensis TTB310	3880	1	0	1	4	0	0	0	0	0	0	1	3	12	8	1	1	2	2	5	2	0	0	0
UP000008387	1002804	Helicobacter bizzozeronii CIII-1	1959	1	0	1	0	0	0	0	0	0	0	1	1	1	0	0	0	1	0	2	0	0	0	0
UP000008392	1005048	Collimonas fungivorans Ter331	4429	2	1	1	4	0	0	0	0	0	0	4	2	11	7	1	1	1	2	15	2	0	0	0
UP000008393	1053648	Candidatus Tremblaya princeps PCVAL	115	0	0	0	0	0	0	0	0	0	0	0	0	0	0	0	0	0	0	0	0	0	0	0
UP000008456	940190	Melissococcus plutonius ATCC 35311	1876	0	0	0	2	1	0	0	0	0	0	1	1	4	0	0	0	0	1	1	3	0	0	0
UP000008457	697281	Mahella australiensis 50-1 BON	2858	0	0	1	1	2	1	1	0	0	0	3	0	2	0	0	0	0	1	4	0	0	0	0
UP000008460	590998	Cellulomonas fimi ATCC 484	3760	0	1	1	2	0	0	1	4	1	2	3	3	6	7	0	0	4	1	4	0	0	0	0
UP000008461	760192	Haliscomenobacter hydrossis DSM 1100	6704	2	1	1	4	0	0	1	0	0	0	4	2	8	6	0	1	1	1	9	0	1	0	0
UP000008466	158189	Sphaerochaeta globosa str. Buddy	3007	0	0	0	2	0	1	0	0	0	0	1	0	5	0	0	0	0	1	1	2	0	0	0
UP000008467	642492	Clostridium lentocellum DSM 5427	4150	0	0	0	5	2	0	1	0	0	0	4	0	1	1	0	0	0	1	3	4	0	0	0
UP000008490	440512	Pseudomonas sp. Chol1	3830	1	1	1	2	1	0	1	0	0	1	2	5	9	3	0	1	4	1	9	1	0	0	0
UP000008495	1184607	Austwickia chelonae NBRC 105200	3048	1	1	2	3	0	0	0	1	0	2	7	4	2	4	0	0	2	1	6	0	1	0	1
UP000008514	313595	Psychroflexus torquis ATCC 700755	3457	1	0	1	3	1	0	1	0	0	0	3	2	2	4	0	1	1	2	10	0	2	0	0
UP000008520	420890	Lactococcus garvieae Lg2	1938	0	0	0	2	1	0	0	1	0	0	1	1	2	3	0	0	0	1	0	0	0	0	0
UP000008540	220664	Pseudomonas protegens Pf-5	6108	1	1	1	3	1	0	1	0	0	1	2	6	15	15	0	1	3	3	24	4	0	0	0
UP000008543	228400	Haemophilus somnus 2336	1971	0	0	1	1	1	0	1	0	0	0	0	1	3	3	0	0	0	1	2	0	0	0	0
UP000008544	477974	Candidatus Desulforudis audaxviator MP104C	2136	0	0	1	3	1	1	0	0	0	0	5	0	1	0	0	0	0	1	2	0	0	0	0
UP000008550	498761	Heliobacterium modesticaldum Ice1	2924	1	1	2	3	2	1	0	0	0	1	3	2	0	0	0	0	0	1	1	1	0	0	0
UP000008558	441768	Acholeplasma laidlawii PG-8A	1380	0	0	1	2	1	0	1	0	0	0	0	0	0	0	0	0	1	1	2	0	0	0	0
UP000008561	96561	Desulfococcus oleovorans Hxd3	3255	0	0	0	5	0	0	1	0	0	0	6	5	4	2	0	0	0	0	1	2	2	0	0
UP000008630	693979	Bacteroides helcogenes P 36-108	3240	2	0	1	3	1	0	2	0	0	0	3	0	2	0	0	0	1	1	0	1	0	0	0
UP000008631	575540	Isosphaera pallida ATCC 43644	3721	1	0	0	3	1	0	1	1	1	0	10	1	4	3	0	2	1	2	6	0	0	0	0
UP000008632	743721	Pseudoxanthomonas suwonensis 11-1	3068	1	0	1	2	0	0	0	0	0	0	3	1	7	6	0	1	0	1	5	0	0	0	0
UP000008633	749222	Nitratifractor salsuginis DSM 16511	2076	1	2	2	5	1	0	1	0	0	0	4	0	2	0	0	0	0	1	1	1	0	0	0
UP000008634	688270	Cellulophaga algicola DSM 14237	4114	1	0	1	2	1	0	2	0	0	0	3	2	7	2	0	0	0	1	9	2	0	0	0
UP000008635	709986	Deinococcus maricopensis DSM 21211	3262	0	1	1	4	1	0	1	1	0	0	4	4	6	8	0	3	1	1	5	0	0	0	0
UP000008639	930171	Pseudarthrobacter phenanthrenivorans Sphe3	4081	1	1	1	3	0	0	0	2	0	1	2	3	7	3	0	0	4	1	18	1	0	0	0
UP000008641	865938	Weeksella virosa DSM 16922	2045	1	1	1	3	0	0	0	0	0	0	3	2	0	1	0	1	0	1	2	0	0	0	0
UP000008674	309807	Salinibacter ruber DSM 13855	2812	0	0	1	3	0	0	1	0	0	1	5	2	6	5	0	0	1	1	4	1	0	0	1
UP000008693	401473	Bifidobacterium dentium Bd1	2121	1	1	1	2	0	0	1	1	0	1	3	0	3	0	0	0	0	0	3	4	0	0	0
UP000008701	290317	Chlorobium phaeobacteroides DSM 266	2579	1	1	1	4	1	0	0	0	0	1	3	0	4	5	0	2	0	1	2	1	1	0	0
UP000008702	367928	Bifidobacterium adolescentis ATCC 15703	1629	1	1	1	2	0	0	1	2	0	1	2	0	0	1	0	0	0	0	2	0	0	0	0
UP000008703	653045	Streptomyces violaceusniger Tu 4113	8941	1	1	2	4	0	0	1	2	1	1	5	6	34	11	0	9	5	15	29	2	0	0	0
UP000008707	768066	Halomonas elongata DSM 2581	3622	1	0	1	3	0	0	0	0	0	0	5	3	7	3	1	0	0	1	18	4	0	0	0
UP000008710	101510	Rhodococcus jostii RHA1	9075	1	3	0	3	1	1	1	3	1	1	7	16	47	29	0	7	19	1	55	4	0	0	4
UP000008718	694427	Paludibacter propionicigenes WB4	3020	1	0	1	3	0	0	1	0	0	0	3	0	2	0	0	0	1	1	1	0	0	0	0
UP000008720	643867	Marivirga tractuosa DSM 4126	3748	1	1	1	2	1	0	1	1	0	1	4	2	2	6	0	0	1	1	4	1	1	0	0
UP000008722	670487	Oceanithermus profundus DSM 14977	2372	1	1	1	2	1	1	0	0	0	0	1	0	5	1	0	0	0	1	3	0	0	0	0
UP000008737	1007105	Pusillimonas sp. T7-7	3751	1	0	1	3	0	0	0	0	0	0	9	4	19	3	1	0	6	2	15	2	0	0	0
UP000008793	634500	Erwinia billingiae Eb661	4915	1	1	2	2	1	0	1	1	0	0	2	0	11	5	0	0	0	1	12	6	0	0	0
UP000008794	717959	Alistipes shahii WAL 8301	2563	0	0	0	2	1	0	1	0	0	0	1	0	1	0	0	0	1	1	1	1	1	0	0
UP000008795	657309	Bacteroides xylanisolvens XB1A	4407	1	0	0	3	1	0	0	0	0	0	7	0	3	0	0	0	1	1	0	1	0	0	0
UP000008796	657324	Butyrivibrio fibrisolvens 16/4	2904	2	0	0	1	1	0	1	2	0	0	4	1	0	2	0	0	0	1	1	2	0	0	0
UP000008797	717608	Clostridium cf. saccharolyticum K10	3073	1	0	1	3	1	0	2	0	0	0	1	0	3	0	0	0	0	1	1	1	0	0	0
UP000008798	717962	Coprococcus catus GD/7	2985	1	0	0	1	1	0	1	0	0	0	0	4	3	0	0	0	2	1	3	1	0	0	0
UP000008801	717960	Faecalitalea cylindroides T2-87	1442	1	0	0	2	0	0	0	0	0	0	0	1	2	0	0	0	0	1	1	2	0	0	0
UP000008803	657319	Eubacterium siraeum 70/3	2347	1	0	0	1	1	0	1	0	0	0	1	0	2	0	0	0	0	1	1	1	0	0	0
UP000008804	718252	Faecalibacterium prausnitzii L2-6	2755	1	0	0	1	1	0	2	0	0	0	0	0	3	0	0	0	0	1	0	1	0	0	0
UP000008805	657308	Gordonibacter pamelaeae 7-10-1-b	2027	0	1	1	0	0	0	0	0	0	0	1	0	1	0	0	0	0	0	2	0	0	0	0
UP000008808	314225	Erythrobacter litoralis HTCC2594	2999	1	1	1	0	0	0	0	0	0	0	2	4	7	7	1	2	2	1	10	0	0	0	0
UP000008809	316058	Rhodopseudomonas palustris HaA2	4680	1	1	1	3	1	0	1	0	0	1	4	5	20	11	1	1	5	1	8	1	0	0	0
UP000008812	243272	Mycoplasma arthritidis 158L3-1	631	0	0	0	0	0	0	0	0	0	0	0	0	0	0	0	0	0	0	0	0	0	0	0
UP000008816	93061	Staphylococcus aureus subsp. aureus NCTC 8325	2889	0	0	0	1	0	0	0	0	0	0	2	3	2	2	0	0	0	1	5	1	0	0	0
UP000008825	404380	Geobacter bemidjiensis Bem	4042	1	0	1	5	2	0	0	0	0	1	5	5	3	4	0	1	0	2	4	2	3	0	0
UP000008838	378753	Kocuria rhizophila DC2201	2352	0	2	2	1	0	0	0	1	0	1	3	1	2	7	0	0	4	1	9	0	0	0	0
UP000008841	290315	Chlorobium limicola DSM 245	2419	1	0	2	4	1	0	0	0	0	1	3	0	3	2	0	2	0	1	2	2	1	0	0
UP000008850	1082931	Pelagibacterium halotolerans B2	3875	1	1	1	1	0	0	1	0	0	0	2	1	7	1	0	0	4	1	14	3	0	0	0
UP000008871	393595	Alcanivorax borkumensis SK2	2752	1	0	1	3	0	0	0	0	0	0	2	3	4	7	0	2	2	1	6	1	0	0	2
UP000008878	203124	Trichodesmium erythraeum IMS101	4342	1	0	0	5	1	1	1	0	0	0	4	0	3	8	0	1	0	1	5	1	0	0	0
UP000008881	1028307	Klebsiella aerogenes KCTC 2190	4909	1	1	2	3	1	0	1	0	0	0	3	2	16	5	0	0	1	3	18	7	0	0	0
UP000008888	857087	Methylomonas methanica MC09	4435	1	1	1	3	0	1	2	0	0	0	6	0	1	2	0	1	0	1	4	0	0	0	0
UP000008895	860228	Capnocytophaga canimorsus Cc5	2394	1	0	1	1	0	0	1	0	0	0	2	0	1	1	0	0	0	1	2	0	1	0	0
UP000008898	63186	Zobellia galactanivorans	4708	1	0	1	1	0	0	1	0	0	0	2	2	16	4	0	1	0	2	8	2	1	0	0
UP000008908	886377	Muricauda ruestringensis DSM 13258	3425	1	0	0	3	0	0	1	0	0	0	4	2	3	0	0	0	0	1	6	1	1	0	0
UP000008914	710696	Intrasporangium calvum DSM 43043	3551	1	1	1	3	0	0	2	3	1	1	10	3	4	7	0	2	5	1	11	0	0	0	0
UP000008915	644966	Thermaerobacter marianensis DSM 12885	2324	0	0	0	2	0	0	0	0	0	0	6	3	2	1	0	0	1	1	3	0	0	0	0
UP000008917	595537	Variovorax paradoxus EPS	5937	1	2	1	3	0	0	2	0	0	1	1	9	23	11	1	2	6	1	17	3	1	0	0
UP000008922	926569	Anaerolinea thermophila UNI-1	3110	0	1	0	5	1	0	0	0	0	0	7	0	6	3	0	2	0	0	0	1	0	0	0
UP000008929	502558	Eggerthella sp. YY7918	2674	1	1	1	4	0	0	0	0	0	0	0	0	6	1	0	0	1	1	3	1	0	0	0
UP000008930	1045854	Weissella koreensis KACC 15510	1346	0	0	1	2	0	0	0	0	0	0	2	1	1	3	0	0	0	0	1	0	0	0	0
UP000008937	1042156	Clostridium sp. SY8519	2601	1	0	1	2	2	0	1	0	0	0	0	5	2	0	0	0	1	1	2	2	0	0	0
UP000008944	904314	Staphylococcus pettenkoferi VCU012	2345	1	0	1	1	0	0	0	0	0	0	1	2	3	1	0	0	0	1	5	1	0	0	0
UP000008952	1094558	Bartonella tamiae Th239	1978	1	1	1	2	0	0	0	0	0	0	1	1	4	0	0	0	1	1	2	2	1	0	0
UP000008953	718255	Roseburia intestinalis XB6B4	3629	1	0	1	3	2	0	1	1	0	0	0	0	1	1	0	0	0	1	1	3	0	0	0
UP000008955	657314	Blautia obeum A2-162	3155	1	0	1	3	1	0	3	0	0	0	1	3	2	1	0	0	0	1	4	4	0	0	0
UP000008956	657313	Ruminococcus torques L2-14	2797	2	0	0	3	1	0	1	1	0	0	2	2	1	0	0	0	0	1	1	4	0	0	0
UP000008957	651822	Fretibacterium fastidiosum	1434	0	0	1	0	1	0	1	0	0	0	0	0	1	1	0	0	0	1	1	1	0	0	0
UP000008959	245012	butyrate-producing bacterium SM4/1	1684	0	0	1	1	0	0	2	0	0	0	0	0	1	1	0	0	0	0	0	0	0	0	0
UP000008960	649756	Anaerostipes hadrus	2771	2	0	0	2	2	0	2	0	0	0	0	1	2	0	0	0	0	1	1	6	0	0	0
UP000008961	245014	butyrate-producing bacterium SS3/4	2993	1	0	1	3	1	0	2	0	0	0	0	1	2	0	0	0	0	1	0	3	0	0	0
UP000008963	862908	Halobacteriovorax marinus SJ	3230	0	0	1	3	0	0	0	0	0	0	3	2	4	6	0	1	0	1	5	0	0	0	0
UP000008975	979556	Microbacterium testaceum StLB037	3671	1	1	0	2	0	0	1	2	1	1	6	6	8	8	0	2	5	1	11	0	0	0	0
UP000009005	1197325	Mycoplasma wenyonii str. Massachusetts	651	0	0	0	0	0	0	0	0	0	0	0	0	0	0	0	0	0	0	1	0	0	0	0
UP000009010	745277	Rahnella aquatilis CIP 78.65 = ATCC 33071	4841	1	0	2	1	1	0	1	1	0	0	3	0	7	9	0	2	0	2	10	4	0	0	0
UP000009011	1191523	Melioribacter roseus P3M-2	2833	1	0	1	4	0	0	0	0	0	0	5	1	2	3	0	1	0	1	3	0	1	0	0
UP000009023	1144314	Rhizobium sp. CF142	7229	1	3	1	1	1	0	1	0	0	0	2	4	34	15	1	4	3	1	22	3	0	0	0
UP000009026	1297742	Myxococcus hansupus	7729	1	1	2	3	1	1	3	1	1	1	9	3	14	8	0	2	4	10	10	0	0	0	1
UP000009036	1160718	Streptomyces auratus AGR0001	6720	1	1	1	4	0	0	1	2	2	1	3	7	21	15	0	2	6	10	18	1	0	0	0
UP000009044	634177	Komagataeibacter medellinensis NBRC 3288	3116	1	1	1	2	1	0	1	0	0	0	4	0	8	3	0	0	1	1	7	1	0	0	0
UP000009047	644282	Desulfarculus baarsii DSM 2075	3268	0	0	1	2	2	0	1	0	0	0	9	4	2	2	0	0	2	1	0	2	3	0	0
UP000009049	313596	Robiginitalea biformata HTCC2501	3211	2	0	1	1	0	0	1	0	1	1	5	2	5	5	0	0	0	1	5	1	0	0	0
UP000009071	573370	Desulfovibrio magneticus RS-1	4663	0	0	0	3	1	0	2	0	0	0	6	0	2	3	0	0	0	1	4	4	0	0	0
UP000009072	267748	Mycoplasma mobile 163K	628	0	0	0	0	1	0	1	0	0	0	0	0	0	2	0	0	0	0	0	0	0	0	0
UP000009073	595494	Tolumonas auensis DSM 9187	3126	1	0	2	1	1	0	1	0	0	0	1	0	2	3	1	0	0	1	2	7	0	0	0
UP000009080	377629	Teredinibacter turnerae T7901	4249	1	1	1	2	0	0	1	0	0	0	1	1	7	4	1	1	1	7	4	0	0	0	0
UP000009081	272630	Methylobacterium extorquens AM1	6233	1	2	1	3	2	0	2	1	0	0	8	2	7	7	1	4	2	2	2	0	0	0	0
UP000009099	396595	Thioalkalivibrio sp. K90mix	2823	1	0	1	0	1	0	1	0	0	0	4	0	2	0	0	0	0	1	2	0	0	0	0
UP000009100	575788	Vibrio tasmaniensis LGP32	4420	1	0	2	2	1	0	1	0	0	0	1	0	2	4	0	0	1	2	8	3	0	0	0
UP000009101	696125	Bartonella clarridgeiae 73	1307	1	0	1	1	0	0	0	0	0	0	0	0	2	0	0	0	1	1	1	0	0	0	0
UP000009102	555778	Halothiobacillus neapolitanus c2	2353	1	2	1	3	1	0	1	0	0	0	5	0	1	1	0	1	0	1	4	0	0	0	0
UP000009134	279238	Novosphingobium aromaticivorans DSM 12444	3917	0	0	0	1	0	0	1	0	0	0	3	6	27	4	1	4	4	1	23	2	1	0	0
UP000009145	754477	Methylophaga frappieri	2689	1	0	1	2	0	0	1	0	0	0	2	0	2	1	0	0	1	1	3	1	0	0	0
UP000009149	481448	Methylacidiphilum infernorum V4	2470	1	0	2	5	3	1	1	0	1	1	4	0	1	0	0	0	0	1	2	0	0	0	0
UP000009154	1112204	Gordonia polyisoprenivorans VH2	5097	1	4	0	4	1	1	1	0	0	1	9	5	20	6	0	6	8	3	19	1	0	0	2
UP000009159	350058	Mycobacterium vanbaalenii PYR-1	5902	1	2	0	4	1	1	1	1	1	2	9	8	29	19	0	6	10	8	20	1	0	0	3
UP000009175	326297	Shewanella amazonensis SB2B	3638	1	0	2	3	0	0	1	0	0	0	2	1	2	5	0	0	0	2	8	1	1	0	0
UP000009181	1002672	Candidatus Pelagibacter sp. IMCC9063	1447	0	0	0	3	0	0	0	0	0	0	1	1	1	1	0	1	0	1	4	1	0	0	0
UP000009186	1034807	Flavobacterium branchiophilum FL-15	2848	1	0	4	3	1	0	1	0	0	0	2	2	1	0	0	0	1	1	6	1	0	0	0
UP000009220	743299	Acidithiobacillus ferrivorans SS3	3067	1	2	1	2	1	0	1	0	0	0	2	0	1	1	0	0	0	1	1	0	0	0	0
UP000009222	545695	Treponema azotonutricium ZAS-9	3457	1	0	1	3	0	1	0	0	0	0	3	0	2	0	0	0	0	1	3	3	0	0	0
UP000009223	545694	Treponema primitia ZAS-2	3512	1	0	1	3	0	1	0	0	0	0	3	0	1	0	0	0	0	1	1	1	0	0	0
UP000009224	875328	Mycolicibacter sinensis	4332	1	1	0	3	1	1	2	2	1	2	3	9	16	9	0	1	8	7	17	0	0	0	4
UP000009226	868595	Desulfotomaculum nigrificans CO-1-SRB	2620	0	0	2	7	2	1	1	0	0	0	4	0	0	1	0	0	0	1	0	3	1	0	0
UP000009229	760568	Desulfotomaculum kuznetsovii DSM 6115	3385	0	0	1	3	2	1	0	0	0	0	6	7	0	0	0	0	3	1	2	1	0	0	0
UP000009230	491952	Marinomonas posidonica IVIA-Po-181	3489	1	0	1	2	1	0	1	0	0	0	0	2	2	0	0	1	1	1	20	0	0	0	0
UP000009234	696281	Desulfotomaculum ruminis DSM 2154	3763	0	0	2	5	2	1	1	0	0	0	4	0	2	1	0	0	0	1	5	4	2	0	0
UP000009235	443218	Hoyosella subflava DQS3-9A1	4703	1	1	1	3	1	1	2	3	1	1	4	10	8	23	1	4	7	1	21	2	0	0	7
UP000009236	743718	Isoptericola variabilis 225	2879	1	1	2	1	0	0	1	4	1	1	5	2	5	6	0	0	2	1	7	0	0	0	0
UP000009242	702113	Novosphingobium sp. PP1Y	4624	1	2	1	1	0	0	1	0	0	0	6	5	31	10	1	3	7	1	20	0	1	0	0
UP000009282	1085623	Glaciecola nitratireducens FR1064	3653	1	1	2	3	0	0	1	0	0	0	4	4	6	7	1	1	3	1	6	2	1	0	0
UP000009283	345219	Bacillus coagulans 36D1	3275	0	0	0	1	1	0	1	0	0	0	2	5	9	3	0	0	1	1	7	4	0	0	0
UP000009286	856793	Micavibrio aeruginosavorus ARL-13	2432	0	0	0	1	0	0	0	0	0	0	4	3	3	0	1	1	0	1	3	0	0	0	0
UP000009309	1185876	Fibrisoma limi BUZ 3	6341	1	0	1	2	0	0	1	3	1	1	6	3	18	7	0	6	3	2	5	0	0	0	0
UP000009311	1423790	Lactobacillus pasteurii DSM 23907 = CRBIP 24.76	1825	1	0	0	1	0	0	0	1	0	0	2	1	0	1	0	0	0	0	1	0	0	0	0
UP000009315	1121428	Desulfotomaculum hydrothermale Lam5 = DSM 18033	2625	0	0	2	4	2	1	1	0	0	0	3	0	0	0	0	0	0	1	1	4	2	0	0
UP000009319	1211777	Rhizobium mesoamericanum STM3625	6358	1	2	1	4	1	0	1	0	0	0	6	4	19	11	1	2	4	1	25	3	0	0	0
UP000009320	1423758	Lactobacillus hominis DSM 23910 = CRBIP 24.179	1890	0	0	0	2	0	0	0	0	0	0	3	0	0	1	0	1	0	0	1	0	0	0	0
UP000009323	1215915	Lactococcus raffinolactis 4877	2346	0	0	0	2	0	0	1	2	0	0	1	0	1	0	0	0	0	1	2	0	0	0	0
UP000009325	872326	Lactobacillus equicursoris 66c	1804	1	0	0	2	1	0	1	0	0	0	2	1	1	2	0	0	0	1	2	0	0	0	0
UP000009330	1203258	Lactobacillus rhamnosus LRHMDP2	2908	1	0	2	1	1	0	1	0	0	0	1	1	3	5	0	0	0	1	3	1	0	0	0
UP000009336	1141662	Providencia burhodogranariea DSM 19968	3888	1	0	2	2	1	0	1	0	0	0	1	1	10	5	0	2	0	4	10	1	0	0	0
UP000009338	1141663	Providencia rettgeri Dmel1	3847	0	0	2	2	0	0	0	0	0	0	1	1	3	5	0	1	0	1	8	3	0	0	0
UP000009356	1208664	Cronobacter sakazakii 696	4638	1	0	1	2	0	0	2	3	0	0	2	1	4	4	0	0	0	1	9	1	0	0	0
UP000009374	412449	Leptospirillum ferrodiazotrophum	2653	0	1	2	2	1	1	0	2	1	1	4	0	1	0	0	0	0	1	1	0	0	0	0
UP000009381	367336	Rhodobacterales bacterium HTCC2255	2236	0	0	0	3	0	0	0	0	0	0	0	3	3	2	0	0	1	1	8	1	0	0	0
UP000009383	655186	uncultured SUP05 cluster bacterium	1283	0	0	0	2	0	0	0	0	0	0	0	1	1	0	0	0	0	0	0	0	0	0	0
UP000009399	1118964	Mycoplasma hyorhinis SK76	751	0	0	0	0	0	0	0	0	0	0	0	0	0	1	0	0	0	0	0	0	0	0	0
UP000009872	742727	Bacteroides oleiciplenus YIT 12058	5450	1	0	0	2	1	0	1	0	0	1	4	0	3	0	0	2	1	1	1	1	0	0	0
UP000009874	883126	Massilia timonae CCUG 45783	5096	1	1	2	3	0	0	0	0	0	0	7	4	13	9	2	1	3	2	8	0	0	0	0
UP000009875	883081	Alloiococcus otitis ATCC 51267	1627	1	0	1	1	0	0	0	0	0	0	2	2	1	0	0	0	1	0	2	2	0	0	0
UP000009877	1236550	Kocuria palustris PEL	2561	0	2	2	1	0	0	0	2	0	1	4	3	0	6	0	0	1	1	8	1	0	0	0
UP000009879	1229781	Brevibacterium casei S18	3216	1	2	2	1	0	0	0	0	0	0	5	2	2	6	0	2	4	1	17	2	0	0	0
UP000009881	1238182	Caenispirillum salinarum AK4	4574	1	0	1	4	1	0	1	0	0	1	5	4	7	8	0	0	3	2	10	0	0	0	0
UP000009883	999423	Selenomonas sp. F0473	1885	0	0	1	3	1	0	1	0	0	0	2	0	2	0	0	0	0	1	3	1	0	0	0
UP000009885	1229783	Staphylococcus massiliensis S46	2323	1	0	1	0	0	0	0	0	0	0	1	1	2	2	0	2	0	1	4	1	0	0	0
UP000009888	883066	Actinobaculum massiliense ACS-171-V-Col2	1696	1	1	0	1	0	0	1	0	0	1	2	1	2	1	0	0	0	0	4	2	0	0	0
UP000010077	1193729	Candidatus Endolissoclinum faulkneri L2	1498	0	0	0	1	0	0	0	0	0	0	1	0	5	0	0	0	0	2	1	0	0	0	0
UP000010099	246198	Prevotella intermedia 17	2252	0	0	0	2	1	0	0	0	0	0	1	0	0	0	0	0	1	1	0	0	0	0	0
UP000010101	46234	Anabaena sp. 90	4476	1	1	0	5	1	1	1	0	0	0	11	0	3	5	0	0	0	4	5	2	0	0	0
UP000010111	1064535	Megasphaera elsdenii DSM 20460	2194	1	0	3	3	1	0	1	0	0	0	0	2	1	0	0	0	1	1	3	6	1	0	0
UP000010116	1123867	SAR86 cluster bacterium SAR86B	1807	0	1	1	1	0	0	0	0	0	0	2	2	5	1	0	2	1	1	5	0	0	0	0
UP000010119	525367	Listeria grayi DSM 20601	2621	0	0	0	1	0	0	0	0	0	0	1	2	5	0	0	3	0	1	4	2	0	0	0
UP000010121	371731	Rhodobacter sp. SW2	3405	1	2	1	2	0	0	1	0	0	0	2	3	7	5	1	0	1	3	10	2	0	0	0
UP000010133	1218169	Pseudomonas putida S11	3597	0	1	1	2	0	0	0	0	0	0	1	1	3	6	0	0	3	1	8	1	0	0	0
UP000010164	1177179	Alcanivorax hongdengensis A-11-3	3416	1	1	1	1	0	0	0	0	0	0	0	3	3	6	0	3	2	1	6	0	0	0	2
UP000010290	1141660	Providencia sneebia DSM 19967	3113	1	0	2	3	1	0	1	0	0	0	0	0	5	4	0	1	0	1	7	1	0	0	0
UP000010294	553217	Enhydrobacter aerosaccus SK60	2573	1	2	1	2	0	0	0	0	0	0	1	3	4	0	0	0	2	1	2	2	0	0	1
UP000010295	944564	Veillonella sp. oral taxon 780 str. F0422	1585	2	0	2	1	0	0	0	0	0	0	0	0	1	0	0	0	0	1	0	2	0	0	0
UP000010296	888064	Enterococcus italicus DSM 15952	2404	1	0	0	2	1	0	1	0	0	0	1	1	1	3	0	0	1	1	5	2	0	0	0
UP000010297	1115512	Atlantibacter hermannii NBRC 105704	4159	1	0	2	2	1	0	1	1	0	0	1	2	3	6	0	0	0	1	8	4	0	0	0
UP000010300	937772	gamma proteobacterium IMCC1989	2844	1	0	1	3	0	0	0	0	0	0	0	1	1	3	0	3	0	1	3	1	0	0	0
UP000010301	525245	Actinomyces coleocanis DSM 15436	1546	0	0	0	2	0	0	1	0	1	1	1	0	0	1	0	0	0	0	1	1	0	0	0
UP000010305	1123866	SAR86 cluster bacterium SAR86A	1298	0	1	1	1	0	0	0	0	0	0	1	2	5	0	0	3	1	1	4	0	0	0	0
UP000010307	219305	Micromonospora sp. ATCC 39149	5614	1	1	1	4	2	0	1	1	0	1	5	3	16	12	0	0	5	11	15	2	0	0	0
UP000010310	1208365	SAR86 cluster bacterium SAR86E	1403	0	1	1	0	0	0	0	0	0	0	1	4	9	0	0	3	1	1	6	0	0	0	0
UP000010312	1159208	Streptococcus infantis SPAR10	1678	0	0	0	2	1	0	1	0	0	0	1	0	1	0	0	0	0	1	1	1	0	0	0
UP000010320	314282	Psychromonas sp. CNPT3	2578	0	0	1	1	0	0	0	0	0	0	1	0	0	2	0	0	1	2	2	2	0	0	0
UP000010321	762984	Bacteroides clarus YIT 12056	3271	1	0	0	2	1	0	1	0	0	0	0	0	4	0	0	1	1	1	0	0	0	0	0
UP000010322	391597	Limnobacter sp. MED105	3244	1	1	1	3	0	0	0	0	0	0	3	3	3	8	0	1	1	2	7	2	0	0	0
UP000010366	1173020	Chamaesiphon minutus PCC 6605	5815	1	1	0	5	2	1	1	0	0	0	11	0	5	8	0	1	0	2	3	1	0	0	0
UP000010367	56110	Oscillatoria acuminata PCC 6304	5755	1	0	0	6	3	1	1	0	0	0	7	0	3	11	0	3	0	2	3	1	0	0	0
UP000010378	28072	Nostoc sp. PCC 7524	5398	1	0	0	5	2	1	1	0	0	0	12	0	3	7	0	2	0	3	7	2	0	0	0
UP000010379	195253	Synechococcus sp. PCC 6312	3541	1	1	0	6	1	1	1	0	0	0	6	0	3	11	0	0	0	1	3	1	0	0	0
UP000010380	373994	Rivularia sp. PCC 7116	6617	1	0	0	5	2	1	1	0	0	0	19	0	4	9	0	2	0	3	5	1	0	0	0
UP000010381	317936	Nostoc sp. PCC 7107	5185	2	1	0	5	2	1	1	0	0	0	12	0	4	7	0	3	0	3	4	1	0	0	0
UP000010382	118163	Pleurocapsa sp. PCC 7327	4255	1	0	0	5	2	1	1	0	0	0	9	1	3	7	0	0	0	2	2	1	0	0	0
UP000010383	1173025	Geitlerinema sp. PCC 7407	3813	1	0	0	4	2	1	1	0	0	0	13	0	2	6	0	0	0	1	5	2	0	0	0
UP000010384	251229	Chroococcidiopsis thermalis PCC 7203	5740	1	2	0	6	2	1	1	1	0	0	23	1	7	10	0	3	0	3	4	1	0	0	0
UP000010385	1173263	Synechococcus sp. PCC 7502	3310	1	1	0	4	1	1	1	0	0	0	6	0	2	3	0	0	0	1	4	1	0	0	0
UP000010386	82654	Pseudanabaena sp. PCC 7367	3824	1	1	0	5	1	1	2	0	0	0	5	0	3	5	0	0	0	1	4	1	0	0	0
UP000010388	292564	Cyanobium gracile PCC 6307	3261	1	1	0	4	1	1	1	0	0	0	4	0	4	2	0	0	0	1	1	1	0	0	0
UP000010389	111781	Leptolyngbya sp. PCC 7376	4153	1	0	0	5	3	1	1	0	0	0	4	0	5	3	0	3	0	1	3	1	0	0	0
UP000010390	99598	Calothrix sp. PCC 7507	5924	2	1	0	6	1	1	1	0	0	0	16	0	6	9	0	3	0	2	6	2	0	0	0
UP000010397	1207075	Pseudomonas sp. UW4	5411	1	1	2	5	1	0	1	0	0	1	5	6	13	11	0	3	6	2	33	4	0	0	0
UP000010411	698759	Streptomyces ipomoeae 91-03	9368	1	1	2	2	0	0	2	3	2	2	11	6	13	12	0	6	7	5	27	2	0	0	1
UP000010419	1127692	Capnocytophaga sp. oral taxon 332 str. F0381	2698	1	0	1	3	0	0	1	0	0	0	2	0	1	0	0	0	0	1	2	0	1	0	0
UP000010420	545697	Clostridium celatum DSM 1785	3453	0	0	2	4	2	0	2	0	0	0	4	1	1	0	0	0	0	1	3	1	0	0	0
UP000010433	1127699	Prevotella saccharolytica F0055	2553	0	0	0	2	1	0	0	0	0	0	2	0	2	0	0	1	1	1	0	0	0	0	0
UP000010441	1035193	Capnocytophaga sp. oral taxon 326 str. F0382	3232	1	0	1	2	0	0	1	0	0	0	3	0	2	0	0	1	0	1	2	0	0	0	0
UP000010445	1035195	Corynebacterium durum F0235	2823	0	2	0	3	0	0	1	1	1	1	7	0	2	4	0	0	0	0	6	0	0	0	0
UP000010448	1005395	Pseudomonas putida CSV86	5834	1	1	1	3	1	0	1	0	0	1	2	4	16	10	0	1	4	2	33	5	0	0	0
UP000010457	1127694	Neisseria sp. oral taxon 020 str. F0370	2879	1	1	1	2	0	0	0	0	0	0	2	0	1	3	0	1	0	1	5	0	0	0	0
UP000010460	1035197	Prevotella sp. oral taxon 473 str. F0040	2316	0	0	0	1	1	0	1	0	0	0	1	0	0	0	0	0	1	1	0	0	0	0	0
UP000010466	1246955	Mycoplasma cynos C142	871	0	0	0	0	0	0	0	0	0	0	0	0	0	1	0	0	0	0	1	0	0	0	0
UP000010467	937777	Deinococcus peraridilitoris DSM 19664	4164	1	1	0	2	1	0	1	2	0	0	3	4	11	7	0	1	2	1	8	0	0	0	0
UP000010471	1173027	Microcoleus sp. PCC 7113	6397	1	1	0	5	2	1	2	1	0	1	14	0	4	9	0	0	0	1	6	1	0	0	0
UP000010472	1173022	Crinalium epipsammum PCC 9333	4697	1	1	0	5	3	1	3	1	0	1	9	0	4	10	0	2	0	2	3	1	0	0	0
UP000010473	111780	Stanieria cyanosphaera PCC 7437	4751	1	0	0	5	3	1	1	0	0	0	15	0	7	10	0	2	0	1	3	1	0	0	0
UP000010474	272123	Anabaena cylindrica PCC 7122	5797	1	0	0	4	2	1	1	0	0	0	9	0	4	10	0	2	0	4	4	2	0	0	0
UP000010475	56107	Cylindrospermum stagnale PCC 7417	6200	1	0	0	5	1	1	1	0	0	0	18	0	7	6	0	1	0	11	5	2	0	0	0
UP000010476	1173026	Gloeocapsa sp. PCC 7428	5003	1	2	0	6	1	1	1	0	0	0	12	0	6	10	0	0	0	4	4	1	0	0	0
UP000010477	1170562	Calothrix sp. PCC 6303	5484	1	1	0	6	2	1	1	0	0	0	15	0	3	4	0	3	0	3	5	1	0	0	0
UP000010478	179408	Oscillatoria nigro-viridis PCC 7112	6276	1	0	0	5	1	1	1	1	0	0	7	0	3	10	0	0	0	2	4	1	0	0	0
UP000010480	755178	Cyanobacterium aponinum PCC 10605	3415	1	0	0	5	2	1	2	0	0	0	6	0	4	3	0	1	0	1	4	1	0	0	0
UP000010481	65093	Halothece sp. PCC 7418	3701	1	0	0	6	1	1	1	0	0	0	8	0	2	5	0	1	0	1	3	1	0	0	0
UP000010483	292563	Cyanobacterium stanieri PCC 7202	2831	1	0	0	4	3	1	1	0	0	0	4	0	3	4	0	1	0	1	3	1	0	0	0
UP000010716	986075	Caldalkalibacillus thermarum TA2.A1	2969	0	0	0	1	0	0	0	0	0	0	1	6	6	2	0	1	1	1	6	2	0	0	0
UP000010729	1246476	Arthrobacter crystallopoietes BAB-32	4118	1	2	2	2	0	0	0	2	0	0	3	1	8	2	0	0	6	1	25	3	0	0	0
UP000010769	1246484	Halobacillus sp. BAB-2008	3935	1	0	0	2	1	0	1	0	0	0	4	6	11	4	0	0	1	1	11	2	0	0	0
UP000010792	1125847	Rhizobium sp. NT-26	4603	1	1	1	3	2	0	2	1	0	0	3	3	10	4	0	1	5	2	21	1	0	0	0
UP000010795	717605	Thermobacillus composti KWC4	3802	0	0	0	4	0	0	0	0	0	0	3	1	7	2	0	1	0	1	1	1	0	0	0
UP000010796	926556	Echinicola vietnamensis DSM 17526	4509	1	0	2	1	1	0	0	0	0	0	6	2	5	5	0	0	2	2	6	2	1	0	0
UP000010797	871963	Desulfitobacterium dichloroeliminans LMG P-21439	3294	0	0	0	4	1	0	1	0	0	0	2	5	1	0	0	0	0	1	1	1	1	0	0
UP000010798	886293	Singulisphaera acidiphila DSM 18658	7126	1	2	0	5	0	0	1	0	0	1	20	2	6	2	0	2	2	5	7	1	0	0	0
UP000010799	1215343	Liberibacter crescens BT-1	1376	1	0	1	2	0	0	0	0	0	0	0	0	2	0	0	0	0	1	1	0	0	0	0
UP000010802	1209989	Tepidanaerobacter acetatoxydans Re1	2640	0	0	1	1	0	0	0	0	0	0	3	0	1	0	0	1	1	1	1	0	0	0	0
UP000010809	1255043	Thioalkalivibrio nitratireducens DSM 14787	3764	1	0	1	1	1	0	1	0	0	0	2	1	1	1	0	0	0	1	2	0	0	0	0
UP000010816	765912	Thioflavicoccus mobilis 8321	3528	1	0	1	2	1	0	1	0	0	1	9	1	1	7	0	0	0	3	2	0	0	0	0
UP000010844	212767	Mycobacterium sp. JS623	6935	1	2	0	6	1	1	1	2	1	2	8	13	27	26	1	8	9	7	17	1	0	0	1
UP000010847	871968	Desulfitobacterium metallireducens DSM 15288	3029	0	0	0	4	1	0	1	0	0	0	4	4	0	0	0	0	2	1	1	2	1	0	0
UP000010862	908937	Prevotella dentalis DSM 3688	2494	0	0	0	1	1	0	0	0	0	0	2	0	3	0	0	0	1	1	0	0	0	0	0
UP000010880	748449	Halobacteroides halobius DSM 5150	2452	0	0	1	3	1	1	1	0	0	0	2	1	1	0	0	0	0	1	2	2	0	0	0
UP000010931	698760	Streptomyces turgidiscabies Car8	10034	1	4	2	4	0	0	2	4	2	2	6	9	25	17	0	2	5	10	28	2	0	0	1
UP000010953	1239962	Mariniradius saccharolyticus AK6	4633	1	2	2	1	1	0	1	0	0	0	7	2	7	5	0	2	2	2	4	0	0	0	0
UP000010988	1220583	Gordonia aichiensis NBRC 108223	4613	1	3	0	3	1	1	1	0	0	1	7	6	14	9	0	2	8	2	19	3	0	0	0
UP000010996	698761	Rhizobium tropici CIAT 899	6230	1	2	1	1	0	0	1	1	0	1	5	3	23	13	1	2	2	2	20	2	0	0	0
UP000010998	754035	Mesorhizobium australicum WSM2073	5790	1	2	1	2	1	0	1	0	0	0	7	2	22	12	1	3	6	1	20	0	0	0	0
UP000011001	671990	Serratia sp. FGI94	4349	1	0	2	3	0	0	0	0	0	0	3	0	9	11	0	1	1	3	12	4	0	0	0
UP000011002	693444	Enterobacteriaceae bacterium strain FGI 57	4320	1	0	2	2	1	0	1	0	0	0	1	1	9	5	0	0	1	2	12	5	0	0	0
UP000011021	887898	Lautropia mirabilis ATCC 51599	2665	1	1	1	4	1	0	2	0	0	0	3	1	3	2	1	0	0	1	4	0	0	0	0
UP000011058	1166018	Fibrella aestuarina BUZ 2	5627	1	0	2	3	0	0	1	1	1	1	6	3	13	9	0	1	2	2	5	0	1	0	0
UP000011072	932213	Serratia sp. M24T3	4788	1	1	2	2	1	0	1	0	0	0	4	2	8	6	0	1	1	2	13	7	0	0	0
UP000011074	1265868	Streptomyces rimosus subsp. rimosus ATCC 10970	8409	1	2	2	6	0	0	1	2	1	1	3	6	19	13	0	3	5	8	24	2	0	0	0
UP000011124	546271	Selenomonas sputigena ATCC 35185	2243	1	0	3	4	1	0	1	0	0	0	2	0	1	0	0	0	0	1	1	0	0	0	0
UP000011126	436113	Mycoplasma mycoides subsp. capri str. GM12	372	0	0	0	0	0	0	0	1	0	0	0	0	0	2	0	0	0	0	1	0	0	0	0
UP000011131	1278073	Myxococcus stipitatus DSM 14675	8043	1	1	2	3	1	1	3	1	1	1	6	5	16	15	0	3	5	19	12	0	0	0	1
UP000011134	1056511	Photobacterium marinum	4904	1	1	2	1	1	0	1	0	0	0	1	1	1	7	1	1	1	3	8	4	0	0	0
UP000011135	1237149	Fulvivirga imtechensis AK7	5952	2	1	1	3	1	0	1	1	0	1	9	3	6	3	0	2	1	10	7	0	1	0	0
UP000011163	1149133	Pseudomonas furukawaii	5703	1	1	1	3	0	0	0	0	0	0	2	11	17	11	1	3	3	2	37	4	0	0	0
UP000011173	592029	Nonlabens dokdonensis DSW-6	3613	2	0	1	3	1	0	1	0	0	1	4	2	4	2	0	0	0	2	6	0	0	0	0
UP000011174	1133592	Candidatus Uzinura diaspidicola str. ASNER	227	0	0	0	0	0	0	0	0	0	0	0	0	0	0	0	0	0	0	0	0	0	0	0
UP000011175	1268239	Pseudoalteromonas luteoviolacea B = ATCC 29581	3680	1	1	2	3	1	0	1	0	0	0	0	1	3	4	0	0	0	1	5	2	0	0	0
UP000011180	102232	Gloeocapsa sp. PCC 73106	4062	1	2	0	6	2	1	1	0	0	0	4	0	6	4	0	0	0	7	3	2	0	0	0
UP000011189	683150	Arthrobacter nitrophenolicus	3633	1	1	1	2	0	0	0	2	0	1	1	3	4	1	0	0	4	1	12	3	0	0	1
UP000011201	927668	Pseudanabaena biceps PCC 7429	4751	1	1	0	6	2	1	1	0	0	0	7	0	5	5	0	0	0	2	4	1	0	0	0
UP000011203	102125	Xenococcus sp. PCC 7305	5347	1	2	0	4	2	1	2	0	0	0	10	1	4	8	0	2	0	2	4	1	0	0	0
UP000011207	1268303	Rhodococcus sp. AW25M09	5128	1	2	0	3	1	1	1	1	1	1	10	6	12	16	0	1	7	1	22	3	0	0	2
UP000011217	1194526	Staphylococcus warneri SG1	2424	1	0	1	1	0	0	0	1	0	0	1	1	6	0	0	1	0	1	5	0	0	0	0
UP000011220	1121335	Clostridium stercorarium subsp. stercorarium DSM 8532	2669	0	0	0	2	2	0	1	0	0	0	3	0	2	0	0	0	0	1	1	3	0	0	0
UP000011547	1208919	Candidatus Kinetoplastibacterium desouzaii TCC079E	742	1	0	0	0	0	0	0	0	0	0	0	0	1	0	0	0	0	1	0	0	0	0	0
UP000011616	1198452	Janthinobacterium sp. HH01	5974	1	2	1	4	0	0	0	0	0	0	4	5	8	10	2	1	2	3	12	1	0	0	1
UP000011617	1261130	Wohlfahrtiimonas chitiniclastica SH04	2004	1	0	1	2	0	0	0	0	0	0	1	0	2	0	0	1	0	1	6	2	1	0	0
UP000011658	1208921	Candidatus Kinetoplastibacterium galatii TCC219	727	1	0	0	1	0	0	0	0	0	0	0	0	1	0	0	0	0	1	0	0	0	0	0
UP000011666	1223545	Gordonia soli NBRC 108243	4907	1	3	1	3	1	1	1	1	0	1	6	9	15	9	0	3	7	3	20	2	0	0	2
UP000011682	1242864	Cystobacter fuscus DSM 2262	10511	1	1	4	4	1	1	1	2	1	1	8	3	26	22	0	2	3	9	12	1	0	0	1
UP000011704	1266370	Nitrospina gracilis 3/211	2962	0	0	1	5	1	1	0	0	0	0	0	2	3	1	0	1	0	1	1	0	0	0	0
UP000011717	1234595	Pacificimonas flava	3056	1	1	1	1	0	0	0	0	0	0	9	5	7	4	1	0	3	1	9	1	0	0	0
UP000011721	1167006	Desulfocapsa sulfexigens DSM 10523	3514	0	3	1	5	0	0	1	0	0	0	4	0	3	0	0	0	0	1	2	1	2	0	0
UP000011723	1121362	Corynebacterium halotolerans YIM 70093 = DSM 44683	2853	0	3	1	4	0	0	1	1	2	1	7	0	4	3	0	3	1	1	12	2	0	0	0
UP000011724	1322246	Pseudodesulfovibrio piezophilus C1TLV30	3342	0	0	0	2	1	0	0	0	0	0	7	0	1	1	0	0	0	1	1	3	0	0	0
UP000011728	931276	Clostridium saccharoperbutylacetonicum N1-4(HMT)	5810	1	0	1	8	1	0	1	0	0	0	4	5	8	1	0	0	2	4	5	7	0	0	0
UP000011729	1094489	Bartonella australis Aust/NH1	1260	1	0	1	1	0	0	0	0	0	0	0	0	2	0	0	0	1	1	1	0	0	0	0
UP000011740	1223523	Streptomyces mobaraensis NBRC 13819 = DSM 40847	6422	1	0	2	8	0	0	1	1	1	1	3	4	14	10	0	4	6	19	15	1	0	0	0
UP000011744	1244869	Magnetospirillum caucaseum	4630	1	1	1	4	1	0	1	0	0	0	5	9	5	1	1	0	7	1	6	0	0	0	0
UP000011746	1230341	Salimicrobium jeotgali	2724	0	0	0	1	0	0	0	0	0	0	5	3	5	1	0	1	0	1	7	2	1	0	0
UP000011752	1288971	Clostridium ultunense Esp	5693	1	0	0	6	0	0	1	1	0	0	5	3	7	3	0	0	1	2	2	2	0	0	0
UP000011757	490759	Marinobacter sp. BSs20148	3885	1	0	1	1	0	0	0	0	0	0	5	3	8	2	1	4	3	1	15	3	0	0	2
UP000011758	999415	Eggerthia catenaformis OT 569 = DSM 20559	1874	0	0	0	2	2	0	2	0	0	0	0	0	0	0	0	1	0	1	1	0	0	0	0
UP000011760	1121353	Corynebacterium callunae DSM 20147	2630	0	2	1	2	0	0	1	1	1	1	5	0	2	2	0	0	0	0	8	1	0	0	0
UP000011765	747365	Thermodesulfobium narugense DSM 14796	1797	1	0	2	2	0	0	0	0	0	0	3	0	1	1	0	0	0	1	4	1	0	0	0
UP000011783	1193007	Leptospira borgpetersenii str. 200701203	4773	1	1	0	3	0	0	0	1	0	0	0	2	3	5	0	1	3	0	2	0	1	0	0
UP000011815	1229512	Blattabacterium cuenoti BPAA	575	0	0	0	1	0	0	0	0	0	0	0	0	0	0	0	0	0	1	1	0	0	0	0
UP000011816	745310	Sphingomonas sp. MM-1	4252	1	1	1	1	0	0	0	0	0	0	2	7	15	7	0	7	5	1	15	1	1	0	0
UP000011834	1124991	Morganella morganii subsp. morganii KT	3510	1	0	2	1	0	0	0	0	0	0	1	1	3	3	0	1	0	1	4	3	0	0	0
UP000011835	1254439	Bifidobacterium thermophilum RBL67	1838	1	1	0	2	0	0	1	1	0	1	3	0	0	1	0	0	0	0	3	2	0	0	0
UP000011846	1171377	Bibersteinia trehalosi USDA-ARS-USMARC-192	2244	0	0	1	2	1	0	1	0	0	0	0	1	5	2	0	0	0	1	2	0	0	0	0
UP000011863	1313172	Ilumatobacter coccineus YM16-304	4290	1	2	0	3	1	0	1	1	0	0	6	5	15	11	0	6	3	2	9	1	0	0	0
UP000011864	1129794	Paraglaciecola psychrophila 170	5601	1	0	2	1	0	0	1	0	0	0	4	3	7	8	0	7	4	1	8	3	1	0	2
UP000011866	1298593	Thalassolituus oleivorans MIL-1	3634	1	0	1	3	0	0	0	0	0	0	2	3	2	3	0	1	2	1	6	0	0	0	0
UP000011885	1263870	Rhodopirellula sallentina SM41	6872	1	3	2	1	1	0	4	0	0	0	13	0	8	4	0	2	1	3	9	1	1	0	0
UP000011910	1279009	Cesiribacter andamanensis AMV16	4225	2	1	1	3	0	0	1	1	0	1	9	2	4	4	0	0	2	1	4	1	1	0	0
UP000011912	1227363	Lactobacillus saerimneri 30a	1519	1	0	2	1	0	0	0	0	0	0	2	0	1	3	0	0	0	2	1	0	0	0	0
UP000011919	1235279	Bhargavaea cecembensis DSE10	3168	0	0	0	1	0	0	0	0	0	0	3	7	6	4	0	0	2	1	8	2	0	0	0
UP000011925	1206777	Pseudomonas sp. Lz4W	4393	1	0	1	2	1	0	1	0	0	1	3	5	10	5	0	1	3	1	16	3	0	0	0
UP000011960	1288826	Marinobacter santoriniensis NKSG1	3692	1	1	1	2	1	0	1	0	0	0	6	6	6	7	0	2	4	1	11	1	0	0	2
UP000011989	1241906	Gordonia sp. NB4-1Y	4263	1	3	0	2	1	1	1	1	0	1	4	8	18	7	0	1	11	2	17	3	0	0	1
UP000011991	1265738	Rhodopirellula maiorica SM1	7824	1	4	1	5	1	0	5	0	0	0	16	2	7	3	0	0	1	2	10	2	0	0	0
UP000012015	1276920	Paeniglutamicibacter gangotriensis Lz1y	4017	1	2	2	2	0	0	1	0	0	0	1	7	5	3	0	0	5	1	15	1	0	0	0
UP000012019	1286106	Methylophaga lonarensis MPL	2536	1	1	1	1	0	0	0	0	0	0	1	0	1	2	0	0	0	1	1	0	0	0	0
UP000012024	1137281	Xanthomarina gelatinilytica	2841	1	0	1	2	0	0	0	0	0	0	5	2	3	3	0	1	0	1	6	1	1	0	0
UP000012028	595460	Rhodopirellula sp. SWK7	7238	1	3	2	5	1	0	3	0	0	0	13	0	6	3	0	2	2	3	10	2	0	0	0
UP000012040	1184267	Bdellovibrio exovorus JSS	2618	1	0	2	4	0	0	0	0	0	0	1	2	2	4	0	0	1	1	6	0	0	0	0
UP000012062	1297569	Mesorhizobium metallidurans STM 2683	6696	1	2	1	3	1	0	1	0	0	0	5	3	29	6	1	3	6	1	19	0	0	0	0
UP000012063	1293054	Halanaerobium saccharolyticum subsp. saccharolyticum DSM 6643	2662	0	0	1	5	1	0	1	1	0	0	2	1	3	0	0	1	0	1	1	7	0	0	0
UP000012081	1300222	Brevibacillus borstelensis AK1	4951	0	0	0	5	0	0	0	0	0	0	4	4	7	4	0	0	1	1	6	4	0	0	0
UP000012082	1294143	Pseudomonas sp. ATCC 13867	5045	1	3	1	3	0	0	0	0	0	0	5	7	10	7	1	3	4	1	22	2	0	0	0
UP000012139	1085538	Leptospira interrogans serovar Bataviae str. HAI135	6014	4	1	0	4	0	0	0	1	0	0	0	2	2	3	0	1	2	0	1	0	0	0	0
UP000012149	1193059	Leptospira santarosai str. CBC1416	4216	1	1	0	4	0	0	0	0	0	0	1	2	2	5	0	0	4	0	2	1	1	0	0
UP000012178	1118156	Stenotrophomonas maltophilia SKK35	3108	1	1	1	2	0	0	0	0	0	0	4	0	8	4	0	1	1	2	3	0	0	0	0
UP000012179	1288494	Nitrosospira lacus	2855	1	1	0	3	1	1	1	0	0	0	5	1	1	1	0	0	0	1	3	0	0	0	0
UP000012181	1297570	Mesorhizobium sp. STM 4661	6913	1	2	1	4	1	0	1	0	0	0	4	3	29	10	1	2	6	1	28	1	0	0	0
UP000012283	1308866	Gracilibacillus halophilus YIM-C55.5	2968	1	0	1	3	0	0	0	0	0	0	4	0	3	1	0	1	0	1	3	1	0	0	0
UP000012313	1218598	Leptospira weilii serovar Ranarum str. ICFT	3924	1	1	0	5	0	0	0	0	0	0	1	1	3	4	0	0	4	0	2	1	1	0	0
UP000012429	363754	Rhizobium freirei PRF 81	6267	1	1	1	3	0	0	1	1	0	0	4	4	18	6	1	0	5	3	26	3	0	0	0
UP000012445	97138	Clostridium sp. ASF356	2792	1	0	1	2	1	0	1	0	0	0	2	0	1	0	0	0	0	1	1	0	1	0	0
UP000012488	908290	Methylobacterium mesophilicum SR1.6/6	5930	1	2	1	4	1	0	1	1	0	0	11	5	15	6	1	2	3	1	13	1	0	0	0
UP000012582	97139	Clostridium sp. ASF502	5980	1	0	0	5	1	0	1	0	0	0	1	0	6	1	0	0	0	1	1	2	0	0	0
UP000012589	1235802	Eubacterium plexicaudatum ASF492	6154	1	0	1	10	2	0	2	1	0	0	6	1	2	1	0	0	0	1	1	0	0	0	0
UP000012594	97137	Lactobacillus sp. ASF360	1930	0	0	0	1	1	0	1	0	0	0	2	1	0	2	0	0	0	0	1	0	0	0	0
UP000012651	997872	Atopobium minutum 10063974	1539	0	0	1	1	1	0	1	0	0	0	0	0	0	1	0	0	0	0	1	3	0	0	0
UP000012675	565655	Enterococcus casseliflavus EC20	3112	0	0	0	1	1	0	1	0	0	0	3	1	7	1	0	0	1	2	2	4	0	0	0
UP000012984	1292033	Mycoplasma putrefaciens Mput9231	666	0	0	0	0	0	0	0	0	0	0	0	0	0	1	0	0	0	0	1	0	0	0	0
UP000012987	1316932	Mannheimia haemolytica M42548	2705	0	0	1	1	1	0	1	0	0	0	0	0	2	3	0	0	0	1	5	1	0	0	0
UP000013004	1236908	Wolbachia endosymbiont of Drosophila simulans wNo	1018	0	0	0	0	0	0	0	0	0	0	0	0	1	0	0	1	0	1	1	0	0	0	0
UP000013007	497321	Thauera sp. 63	3951	1	1	1	1	1	0	1	0	0	0	7	7	8	4	4	2	6	1	5	2	1	0	0
UP000013015	888050	Actinomyces cardiffensis F0333	1983	1	1	1	3	0	0	1	1	1	1	2	0	0	1	0	0	1	0	2	0	0	0	0
UP000013026	504728	Meiothermus ruber DSM 1279	3037	1	1	1	3	1	0	0	0	0	0	3	2	7	4	0	0	1	1	9	0	1	0	0
UP000013063	1292034	Caulobacter vibrioides OR37	4074	1	1	1	3	0	0	0	0	0	0	9	9	14	8	1	2	4	1	12	1	0	0	0
UP000013072	1174684	Sphingopyxis sp. MC1	3467	1	1	1	0	0	0	0	0	0	0	9	5	9	3	0	1	2	1	11	2	0	0	0
UP000013086	1217715	Acinetobacter bohemicus ANC 3994	3305	1	0	1	3	0	0	0	0	0	0	3	3	6	9	0	1	1	2	8	2	0	0	1
UP000013097	999411	Clostridium colicanis 209318	3294	0	0	1	2	2	0	1	0	0	0	2	1	0	0	0	0	0	1	2	3	1	0	0
UP000013101	1217693	Acinetobacter sp. NIPH 2171	3287	3	0	1	1	0	0	0	0	0	0	1	3	5	5	0	0	1	1	10	2	0	0	1
UP000013117	1120926	Acinetobacter gerneri DSM 14967 = CIP 107464	4174	3	1	1	3	0	0	0	0	0	0	3	4	8	6	0	2	2	1	12	2	0	0	1
UP000013121	1217655	Acinetobacter guillouiae CIP 63.46	4594	2	0	1	3	0	0	0	0	0	0	1	4	9	4	0	2	2	1	13	3	0	0	1
UP000013131	1188233	Mycoplasma auris 15026	615	0	0	0	0	0	0	0	0	0	0	0	0	0	0	0	0	0	0	0	0	0	0	0
UP000013140	305700	Thauera sp. 27	4268	1	1	1	1	0	0	0	0	0	0	7	4	5	6	4	3	5	1	7	1	1	0	0
UP000013165	626887	Marinobacter nanhaiticus D15-8W	4732	1	1	1	1	0	0	0	0	0	0	6	6	7	10	0	5	3	1	14	1	0	0	2
UP000013167	1193181	Tetrasphaera elongata Lp2	3089	1	3	0	2	0	0	2	1	0	1	9	2	3	2	0	3	3	1	7	0	0	0	1
UP000013201	1301087	Sphingobium japonicum BiD32	4670	1	1	1	1	0	0	1	0	0	0	5	14	16	4	1	3	2	1	17	0	0	0	0
UP000013220	1188235	Mycoplasma bovigenitalium 51080	677	0	0	0	1	0	0	0	0	0	0	1	0	0	1	0	0	0	0	0	0	0	0	0
UP000013232	1123367	Thauera linaloolentis 47Lol = DSM 12138	3836	1	2	1	1	1	0	1	0	0	0	4	5	9	3	3	2	1	1	10	0	1	0	0
UP000013300	666686	Bacillus sp. 1NLA3E	4384	1	0	1	3	2	0	2	1	0	0	1	3	7	4	0	1	2	1	9	4	0	0	0
UP000013315	1239793	Streptococcus mitis 13/39	2020	0	0	0	2	1	0	1	0	0	0	2	0	0	1	0	1	0	1	1	0	0	0	0
UP000013378	1304284	Caldisalinibacter kiritimatiensis	2681	1	0	1	2	2	0	2	0	0	0	4	3	0	2	0	0	2	1	2	0	1	0	0
UP000013520	767817	Desulfotomaculum gibsoniae DSM 7213	4313	0	0	1	3	1	1	0	0	0	0	4	6	0	3	0	0	2	1	2	2	2	0	0
UP000013523	86416	Clostridium pasteurianum BC1	4454	1	1	2	6	2	1	0	0	0	0	4	3	3	2	0	0	0	2	6	11	1	0	0
UP000013525	1273125	Rhodococcus rhodnii LMG 5362	4412	1	1	1	3	1	1	1	2	2	1	5	5	12	9	0	0	7	2	11	0	0	0	0
UP000013526	1268236	Aeromonas molluscorum 848	3943	1	1	2	1	1	0	1	0	0	0	1	0	4	5	0	1	1	1	9	3	0	0	0
UP000013541	649831	Actinoplanes sp. N902-109	8211	1	2	2	4	1	0	1	3	1	1	15	4	14	17	0	5	5	12	15	3	0	0	0
UP000013561	568817	Serratia symbiotica str. Cinara cedri	672	1	0	1	0	0	0	0	0	0	0	2	0	0	0	0	0	0	1	0	0	0	0	0
UP000013563	1304279	Mycobacterium tuberculosis str. Haarlem/NITR202	3671	0	1	0	3	0	0	1	2	0	1	1	2	4	3	0	4	2	3	4	0	0	0	0
UP000013567	1154756	Serratia plymuthica PRI-2C	4973	1	1	2	3	1	0	1	0	0	0	5	1	9	9	0	0	1	2	13	5	0	0	0
UP000013568	914128	Serratia symbiotica str. Tucson	2157	1	0	1	2	0	0	0	0	0	0	3	0	0	1	0	0	0	1	1	0	0	0	0
UP000013750	1158614	Enterococcus gilvus ATCC BAA-350	4101	0	0	0	2	1	0	1	0	0	0	1	2	8	1	0	2	2	1	5	9	0	0	0
UP000013777	1158606	Enterococcus asini ATCC 700915	2389	1	0	0	2	1	0	1	0	0	0	2	1	3	1	0	0	1	1	1	5	0	0	0
UP000013782	1158607	Enterococcus pallens ATCC BAA-351	5181	0	0	0	2	1	0	1	1	0	0	3	1	9	2	0	1	1	1	5	8	0	0	0
UP000013785	1158610	Enterococcus phoeniculicola ATCC BAA-412	3510	0	0	0	2	0	0	0	0	0	0	1	1	4	1	0	0	1	2	2	5	0	0	0
UP000013858	1158608	Enterococcus haemoperoxidus ATCC BAA-382	3209	0	0	0	3	1	0	1	0	0	0	2	1	4	2	0	0	1	1	4	3	0	0	0
UP000013866	1158604	Enterococcus villorum ATCC 700913	2841	0	0	0	2	0	0	0	1	0	0	2	1	2	1	0	0	1	1	2	1	0	0	0
UP000013893	1332188	Candidatus Saccharimonas aalborgensis	1033	0	0	0	0	1	0	1	0	0	0	1	0	0	0	0	0	0	0	0	0	0	0	0
UP000013909	1232681	Lunatimonas lonarensis	4825	1	0	2	2	0	0	1	0	0	0	6	2	8	2	0	2	1	2	5	1	0	0	0
UP000013911	1285586	Lysinibacillus sphaericus OT4b.31	4573	1	1	1	1	0	0	0	0	0	0	3	5	5	2	0	0	0	2	6	2	1	0	0
UP000013963	1276229	Spiroplasma syrphidicola EA-1	1006	0	0	0	0	0	0	0	0	0	0	0	0	0	1	0	0	0	0	1	0	0	0	0
UP000013966	758793	Burkholderia sp. RPE64	6724	1	3	1	3	2	0	1	0	0	0	15	11	27	18	0	3	4	3	27	4	0	0	0
UP000013968	1156913	Amycolatopsis orientalis HCCB10007	8161	1	1	2	2	1	1	0	1	0	0	7	8	13	29	0	4	6	10	26	0	0	0	2
UP000013980	1053234	Bacillus cereus VD136	5226	1	1	1	3	1	0	1	0	0	0	4	5	7	4	0	1	1	1	9	2	0	0	0
UP000013981	1203606	Butyricicoccus pullicaecorum 1.2	3107	1	0	0	1	2	0	2	0	0	0	1	1	1	0	0	0	1	1	0	5	0	0	0
UP000014012	1315976	Plesiomonas shigelloides 302-73	3377	1	1	2	2	0	0	0	0	0	0	7	1	3	5	1	0	1	1	5	1	0	0	1
UP000014030	1202533	Bacillus nealsonii AAU1	4789	0	0	0	3	1	0	1	4	0	0	3	0	4	4	0	1	0	1	5	3	0	0	0
UP000014038	1094491	Bartonella bovis 91-4	1267	1	0	1	0	0	0	0	0	0	0	0	0	2	0	0	0	1	1	2	0	0	0	0
UP000014081	1235793	Lachnospiraceae bacterium COE1	4614	1	0	1	2	1	0	1	0	0	0	1	1	2	1	0	0	0	1	0	3	0	0	0
UP000014090	1235792	Lachnospiraceae bacterium M18-1	5263	1	0	0	6	1	0	1	0	0	0	2	0	3	1	0	0	0	1	1	2	0	0	0
UP000014104	1140002	Enterococcus avium ATCC 14025	4469	0	0	0	2	1	0	1	0	0	0	1	1	7	2	0	0	0	1	6	11	0	0	0
UP000014108	1235797	Oscillibacter sp. 1-3	4209	0	0	0	3	2	0	1	0	0	0	3	1	2	1	0	0	1	2	1	2	0	0	0
UP000014112	397287	Lachnospiraceae bacterium 28-4	3953	1	0	1	1	1	0	2	0	0	0	4	1	0	0	0	0	0	1	3	1	0	0	0
UP000014113	1121865	Enterococcus columbae DSM 7374 = ATCC 51263	2315	0	0	0	2	1	0	1	0	0	0	3	1	3	1	0	0	1	1	2	2	0	0	0
UP000014115	740709	Idiomarina xiamenensis 10-D-4	2673	1	0	2	2	0	0	0	0	0	0	4	1	0	5	0	3	0	1	5	0	0	0	0
UP000014117	1235799	Lachnospiraceae bacterium 3-2	4125	1	0	0	2	1	0	2	0	0	0	3	0	2	2	0	1	0	1	3	5	0	0	0
UP000014118	397291	Lachnospiraceae bacterium A4	6440	1	0	1	3	2	0	1	0	0	0	6	1	3	2	0	0	0	1	0	5	0	0	0
UP000014127	1139219	Enterococcus dispar ATCC 51266	2622	0	0	0	2	1	0	1	0	0	0	1	1	1	0	0	0	1	1	3	3	0	0	0
UP000014129	1235835	Anaerotruncus sp. G3(2012)	3406	1	0	0	4	1	0	1	0	0	0	1	1	3	0	0	0	1	1	0	4	0	0	0
UP000014134	1235800	Lachnospiraceae bacterium 10-1	4280	1	0	1	3	1	0	2	0	0	0	6	1	0	0	0	0	1	1	2	0	0	0	0
UP000014136	1139996	Enterococcus saccharolyticus subsp. saccharolyticus ATCC 43076	2573	1	0	1	1	1	0	2	1	0	0	1	1	7	0	0	0	1	1	2	3	0	0	0
UP000014139	1292037	Amycolatopsis vancoresmycina DSM 44592	8680	1	1	1	4	1	1	1	4	1	4	8	6	13	28	0	2	5	21	20	1	0	0	1
UP000014140	1235789	Parabacteroides goldsteinii dnLKV18	5574	1	0	0	4	1	0	1	0	0	0	6	0	3	0	0	1	0	1	1	1	0	0	0
UP000014150	397290	Lachnospiraceae bacterium A2	5159	1	0	1	5	2	0	1	0	0	0	0	1	0	0	0	0	1	1	2	5	0	0	0
UP000014154	1235796	Firmicutes bacterium M10-2	2256	1	0	0	2	1	0	1	0	0	0	0	0	4	1	0	0	0	0	1	1	0	0	0
UP000014155	1195236	Clostridium termitidis CT1112	5302	1	0	2	3	1	0	1	0	0	0	3	0	5	2	0	0	0	8	3	5	0	0	0
UP000014174	1150600	Arcticibacter svalbardensis MN12-7	4309	2	1	2	4	1	0	2	0	0	1	5	0	8	3	0	1	1	1	5	2	0	0	0
UP000014176	1235790	Eubacterium sp. 14-2	3773	1	0	1	4	2	0	1	0	0	0	0	1	1	0	0	1	0	2	2	3	0	0	0
UP000014188	397288	Lachnospiraceae bacterium 3-1	4984	1	0	1	4	2	0	1	1	0	0	0	2	4	1	0	0	1	2	2	5	1	0	0
UP000014199	1140001	Enterococcus durans ATCC 6056	2991	0	0	0	2	0	0	0	0	0	0	2	1	4	0	0	0	1	2	2	1	0	0	0
UP000014204	1235794	Enterorhabdus caecimuris B7	2435	1	1	1	2	0	0	0	0	0	0	0	0	2	0	0	0	0	1	0	1	0	0	0
UP000014211	1235798	Dorea sp. 5-2	5824	1	0	0	5	1	0	2	0	0	0	4	0	4	2	0	1	1	1	1	4	0	0	0
UP000014216	1286635	Desulfotignum phosphitoxidans DSM 13687	4515	0	0	0	6	0	0	2	0	0	1	6	5	2	2	0	0	2	2	3	3	3	0	0
UP000014227	1303518	Chthonomonas calidirosea T49	2809	1	1	0	7	1	1	0	0	0	0	11	1	5	0	0	0	0	1	2	0	0	0	0
UP000014290	1268068	Pseudomonas sp. G5(2012)	6766	1	2	1	2	1	0	1	0	1	1	2	10	21	11	1	7	7	2	39	6	0	0	0
UP000014407	1078083	Staphylococcus sp. HGB0015	2281	1	0	1	1	0	0	0	0	0	0	1	1	1	1	0	0	0	1	6	1	0	0	0
UP000014410	1078086	Streptomyces sp. HGB0020	8369	1	2	2	6	0	0	3	6	2	3	8	6	27	14	0	7	7	2	26	3	0	0	1
UP000014411	990285	Rhizobium grahamii CCGE 502	6839	1	3	1	2	0	0	1	0	0	0	3	5	22	12	1	4	3	1	20	3	0	0	0
UP000014412	1078085	Paenisporosarcina sp. HGH0030	3445	1	0	1	2	1	0	1	1	0	0	2	4	4	6	0	0	1	1	5	2	0	0	0
UP000014417	883161	Propionimicrobium lymphophilum ACS-093-V-SCH5	2076	1	0	1	1	0	0	1	0	0	1	6	1	2	0	0	0	1	1	2	2	0	0	0
UP000014461	1331007	Agarivorans albus MKT 106	4397	1	1	2	1	1	0	1	0	0	0	6	0	4	6	0	0	1	1	8	2	0	0	0
UP000014463	1121939	Halomonas anticariensis FP35 = DSM 16096	4705	1	0	1	2	0	0	0	0	0	0	7	2	12	2	0	0	1	1	19	0	0	0	0
UP000014539	883165	Campylobacter ureolyticus ACS-301-V-Sch3b	1686	1	1	2	1	0	0	0	0	0	0	0	0	1	0	0	0	0	1	1	0	0	0	0
UP000014540	1193011	Leptospira fainei serovar Hurstbridge str. BUT 6	4106	1	1	0	2	0	0	0	0	0	0	5	4	2	8	0	1	4	0	3	1	0	0	0
UP000014541	1125699	Treponema maltophilum ATCC 51939	2287	1	0	0	1	0	1	0	0	0	0	3	0	1	1	0	0	0	1	3	4	0	0	0
UP000014567	1203605	Propionibacterium sp. oral taxon 192 str. F0372	2523	1	0	1	2	0	0	1	0	0	1	5	1	0	1	0	0	1	1	3	1	1	0	0
UP000014568	421052	Acinetobacter rudis CIP 110305	3609	2	0	1	2	0	0	0	0	0	0	4	4	5	5	0	1	2	2	14	3	0	0	1
UP000014577	1203568	Dermabacter sp. HFH0086	2120	0	2	1	2	0	0	1	0	1	1	3	0	0	1	0	0	1	1	2	0	0	0	0
UP000014585	566551	Cedecea davisae DSM 4568	4801	1	0	2	3	1	0	1	0	0	0	0	0	7	7	0	1	1	2	11	2	0	0	0
UP000014594	1260356	Enterococcus faecalis 13-SD-W-01	3105	0	0	0	3	0	0	0	1	0	0	3	1	4	0	0	0	1	2	1	1	0	0	0
UP000014629	1286094	Streptomyces aurantiacus JA 4570	7750	1	2	2	8	0	0	1	3	2	0	6	7	20	14	0	3	5	6	22	1	0	0	0
UP000014632	1266371	Candidatus Tremblaya phenacola PAVE	175	0	0	0	0	0	0	0	0	0	0	0	0	0	0	0	0	0	0	0	0	0	0	0
UP000014803	1254432	Sorangium cellulosum So0157-2	10372	1	1	2	4	2	1	1	0	0	0	12	3	15	9	0	3	1	6	12	2	1	0	0
UP000014822	1330036	Osedax symbiont Rs1	4383	0	0	0	4	0	0	0	0	0	0	0	3	4	3	0	1	2	2	13	1	1	0	0
UP000014827	1112230	Chlamydia psittaci 84-8471/1	2863	0	0	0	1	0	0	4	1	0	0	0	0	0	0	0	1	0	0	0	0	0	0	0
UP000014830	1330035	Osedax symbiont Rs2	4523	0	0	0	1	0	0	0	0	0	0	3	4	13	6	0	1	0	1	17	2	1	0	0
UP000014841	1112246	Chlamydia psittaci 08-2626_L3	1401	0	0	0	0	1	0	1	0	0	0	0	0	0	0	0	1	0	1	0	0	0	0	0
UP000014850	911242	Pseudomonas sp. CFII64	5837	1	0	1	3	1	0	1	0	0	1	3	2	20	13	1	1	4	2	23	4	0	0	0
UP000014883	1238236	Chlamydia psittaci 10_743_SC13	1349	0	0	0	0	1	0	1	0	0	0	0	0	0	0	0	1	0	1	0	0	0	0	0
UP000014923	941824	Thermobrachium celere DSM 8682	2370	0	0	0	2	1	0	1	0	0	0	2	2	0	0	0	0	1	1	0	1	0	0	0
UP000014925	1262915	Phascolarctobacterium sp. CAG:266	1778	1	0	2	1	0	0	0	0	0	0	0	0	0	0	0	0	0	1	0	4	0	0	0
UP000014944	1262914	Phascolarctobacterium sp. CAG:207	2228	1	0	2	2	0	0	0	0	0	0	1	1	0	2	0	0	0	1	1	3	1	0	0
UP000014960	941449	Desulfovibrio sp. X2	3444	0	0	0	3	1	0	1	0	0	0	12	0	2	1	0	0	0	1	4	2	0	0	0
UP000014962	641526	Winogradskyella psychrotolerans RS-3	4023	1	0	1	4	0	0	1	0	0	0	5	2	3	6	0	1	0	2	9	2	0	0	0
UP000014974	641524	Cyclobacterium qasimii M12-11B	5957	3	0	2	4	0	0	2	0	0	0	5	1	8	1	0	2	1	0	5	1	1	0	0
UP000014975	1121439	Desulfovibrio alkalitolerans DSM 16529	2924	0	0	0	2	1	0	1	0	0	0	11	0	2	1	0	0	0	1	2	1	0	0	0
UP000014977	1121405	Desulfococcus multivorans DSM 2059	3844	0	0	0	3	0	0	1	0	0	0	4	5	1	2	0	1	3	2	3	2	4	0	0
UP000014983	1276221	Spiroplasma diminutum CUAS-1	858	0	0	0	0	0	0	0	0	0	0	0	0	0	0	0	0	0	0	1	0	0	0	0
UP000014984	1276220	Spiroplasma taiwanense CT-1	989	0	0	0	0	0	0	0	0	0	0	0	0	0	0	0	0	0	0	1	0	0	0	0
UP000015001	1283301	Streptomyces afghaniensis 772	9009	1	1	1	5	2	0	2	3	2	2	10	8	14	17	0	5	7	4	30	2	0	0	1
UP000015332	667013	Candidatus Carsonella ruddii DC	206	0	0	0	0	0	0	0	0	0	0	0	0	0	0	0	0	0	0	1	0	0	0	0
UP000015345	888054	Bacteroidetes bacterium oral taxon 272 str. F0290	2103	0	0	0	3	1	0	1	0	0	0	0	0	2	0	0	0	2	1	2	1	0	0	0
UP000015346	1123069	Rubellimicrobium thermophilum DSM 16684	3244	1	0	1	2	0	0	2	1	0	0	0	3	8	2	1	0	0	2	11	0	0	0	0
UP000015347	1123237	Salipiger mucosus DSM 16094	5583	1	2	1	1	1	0	2	0	0	0	5	5	9	2	2	1	4	2	9	5	0	0	0
UP000015351	1123360	Litoreibacter arenae DSM 19593	3637	1	2	1	1	0	0	0	0	0	0	0	4	8	2	1	1	2	1	9	1	0	0	0
UP000015362	1351754	Avibacterium paragallinarum JF4211	2639	0	0	0	0	0	0	0	0	0	0	0	0	0	0	0	0	0	0	0	0	0	0	0
UP000015382	1343077	Candidatus Nasuia deltocephalinicola str. NAS-ALF	137	0	0	0	0	0	0	0	0	0	0	0	0	0	0	0	0	0	0	0	0	0	0	0
UP000015388	1224163	Corynebacterium maris DSM 45190	2584	0	2	1	3	0	0	1	1	1	1	6	1	3	4	0	2	3	0	8	1	0	0	0
UP000015423	1214242	Streptomyces collinus Tu 365	6682	1	2	2	5	0	0	2	4	2	2	9	8	13	11	0	1	4	3	19	1	0	0	1
UP000015455	1348657	Thauera terpenica 58Eu	3813	1	1	1	1	0	0	0	0	0	0	6	5	8	1	3	2	8	1	7	2	1	0	0
UP000015459	1201290	Bacteriovorax sp. BAL6_X	3062	0	0	1	1	0	0	0	0	0	0	1	2	2	2	0	1	0	1	5	0	1	0	0
UP000015480	1367847	Paracoccus aminophilus JCM 7686	4462	1	2	1	1	0	0	0	0	0	0	0	4	19	4	1	0	5	1	15	1	0	0	0
UP000015500	1921421	Geobacillus genomosp. 3	3564	0	0	0	2	1	0	1	0	0	0	5	6	12	3	0	1	2	1	6	3	1	0	0
UP000015503	1245471	Pseudomonas resinovorans NBRC 106553	5795	1	1	2	2	0	0	0	0	0	0	2	11	18	10	1	1	8	2	32	7	0	0	0
UP000015520	1172190	Sulfurimonas hongkongensis	2290	1	2	1	3	2	0	1	0	0	0	1	0	2	1	0	0	0	1	2	0	0	0	0
UP000015523	1346791	Sphingobium ummariense RL-3	4462	1	1	1	2	1	0	1	0	0	0	4	5	13	6	1	1	3	1	10	2	0	0	0
UP000015524	1114964	Sphingobium baderi LL03	4697	1	1	1	1	0	0	0	0	0	0	8	11	22	8	3	2	7	1	12	3	0	0	0
UP000015525	1329909	Sphingobium quisquiliarum P25	3949	1	1	1	2	1	0	1	0	0	0	4	4	17	2	1	3	4	1	12	0	0	0	0
UP000015527	1096930	Novosphingobium lindaniclasticum LE124	4481	1	1	1	3	0	0	1	0	0	0	10	6	13	7	1	3	3	2	12	0	0	0	0
UP000015531	1331060	Sphingobium lactosutens DS20	5090	1	1	1	3	0	0	1	0	0	0	3	5	21	5	2	3	4	1	18	2	0	0	0
UP000015559	1163617	Sulfuricella denitrificans skB26	3071	1	0	1	2	1	0	2	0	0	1	6	0	1	0	0	0	0	1	1	0	1	0	0
UP000015562	1248727	endosymbiont of unidentified scaly snail isolate Monju	2228	1	0	1	1	1	0	1	0	0	0	5	1	1	2	0	0	0	1	0	0	0	0	0
UP000015604	1379698	candidate division Zixibacteria bacterium RBG-1	1906	0	0	1	4	0	0	0	0	0	0	5	4	1	0	0	0	0	1	1	0	1	0	0
UP000015607	1356854	Alicyclobacillus acidoterrestris ATCC 49025	4102	2	0	1	4	0	0	0	0	0	0	3	3	12	3	0	1	0	1	13	2	0	0	0
UP000015620	1291379	Treponema pedis str. T A4	2775	0	0	0	2	1	1	0	0	0	0	1	0	1	0	0	0	0	1	1	3	0	0	0
UP000015748	1292036	Paeniclostridium sordellii ATCC 9714	5956	0	0	0	5	0	0	3	3	0	0	0	0	1	0	0	1	0	1	1	2	0	0	0
UP000015812	1353530	Bacteriovorax sp. DB6_IX	3188	0	0	0	1	0	0	0	0	0	0	0	1	4	3	0	0	1	1	5	0	1	0	0
UP000015813	1221520	Photorhabdus temperata subsp. temperata M1021	4436	1	0	1	1	0	0	0	0	0	0	4	0	5	5	0	1	1	2	4	3	0	0	0
UP000015854	1234876	Lactococcus lactis subsp. cremoris TIFN6	2310	0	0	0	3	0	0	0	0	0	0	0	1	4	0	0	0	0	1	0	1	0	0	0
UP000015857	1353529	Bacteriovorax sp. BSW11_IV	3457	0	0	1	3	0	0	0	0	0	0	1	3	2	4	0	0	0	1	5	1	0	0	0
UP000015873	1354301	Clostridium sp. BL8	4752	0	0	0	5	1	0	1	0	0	0	3	1	0	1	0	0	0	1	4	2	0	0	0
UP000015895	1201288	Bacteriovorax sp. Seq25_V	3292	0	0	1	2	0	0	0	0	0	0	2	2	2	1	0	0	1	1	5	0	1	0	0
UP000015924	1384484	Adlercreutzia equolifaciens DSM 19450	2281	1	1	1	1	0	0	0	0	0	0	1	0	3	0	0	0	0	1	2	0	0	0	0
UP000015929	575614	Prevotella sp. oral taxon 299 str. F0039	1947	0	0	0	1	1	0	1	0	0	0	3	0	0	0	0	0	1	1	0	0	0	0	0
UP000015933	1316408	Streptococcus sp. HSISM1	2219	0	0	0	2	1	0	1	0	0	0	2	0	1	0	0	0	0	1	1	2	0	0	0
UP000015934	1316409	Streptococcus sp. HSISB1	2160	0	0	0	2	0	0	0	0	0	0	0	0	1	0	0	0	0	1	1	0	0	0	0
UP000015939	1316414	Enterococcus sp. HSIEG1	3882	0	0	0	2	0	0	1	1	0	0	1	0	4	1	0	2	1	1	1	6	0	0	0
UP000015961	1140003	Enterococcus sulfureus ATCC 49903	2176	0	0	0	2	1	0	1	0	0	0	1	1	3	1	0	0	1	1	2	2	0	0	0
UP000015971	110319	Nocardioides sp. CF8	3893	1	1	2	2	0	0	1	2	1	1	3	5	7	6	0	5	6	1	9	1	0	0	1
UP000015993	679199	Alloprevotella rava F0323	2009	0	0	0	1	1	0	1	0	0	0	4	0	0	0	0	0	1	1	0	1	0	0	0
UP000016016	679191	Prevotella amnii CRIS 21A-A	2021	0	0	0	1	1	0	1	0	0	0	2	0	1	0	0	0	1	1	0	0	0	0	0
UP000016023	883158	Prevotella micans F0438	2058	0	0	0	1	1	0	0	0	0	0	2	0	1	0	0	1	1	1	0	0	0	0	0
UP000016057	1234409	Catellicoccus marimammalium M35/04/3	1196	0	0	0	1	0	0	0	0	0	0	0	1	3	0	0	0	0	0	1	1	0	0	0
UP000016064	1046581	Chlamydia ibidis 10-1398/6	1017	0	0	0	0	1	0	1	0	0	0	0	0	0	0	0	1	0	1	0	0	0	0	0
UP000016069	1333854	Pseudomonas alcaligenes OT 69	6392	1	0	1	2	1	0	1	0	1	1	2	7	12	10	0	2	5	2	17	2	1	0	0
UP000016160	1347342	Formosa agariphila KMM 3901	3557	1	0	1	3	1	0	1	0	0	0	4	2	10	2	0	0	0	1	9	2	1	0	0
UP000016201	1120927	Acinetobacter tandoii DSM 14970 = CIP 107469	3867	3	0	1	3	0	0	0	0	0	0	3	2	5	5	0	1	3	1	9	1	0	0	1
UP000016233	862967	Streptococcus intermedius B196	1812	0	0	0	3	1	0	1	0	0	0	1	0	1	0	0	0	0	1	1	1	0	0	0
UP000016307	1160719	Cutibacterium granulosum DSM 20700	1962	1	2	1	1	0	0	3	3	1	1	4	0	1	2	0	0	1	1	2	0	0	0	0
UP000016368	887062	Hylemonella gracilis ATCC 19624	3342	0	0	1	5	0	0	0	0	0	0	0	2	7	2	1	2	1	1	6	1	0	0	0
UP000016412	1125725	Treponema socranskii subsp. socranskii VPI DR56BR1116 = ATCC 35536	2624	0	0	0	1	0	1	0	0	0	0	1	0	2	0	0	1	0	1	1	5	0	0	0
UP000016462	1330458	Agrococcus pavilionensis RW1	2776	1	1	1	2	0	0	1	1	1	1	6	4	6	3	0	0	2	1	13	0	0	0	0
UP000016486	1507	Clostridium sp. ATCC 29733	3692	1	0	1	2	1	0	2	0	0	0	1	0	2	0	0	0	0	1	1	5	0	0	0
UP000016487	1117314	Pseudoalteromonas citrea DSM 8771	4457	1	0	2	4	0	0	1	0	0	0	1	1	2	7	0	2	1	4	7	2	0	0	0
UP000016488	1386078	Pseudomonas sp. EGD-AK9	4967	1	2	1	2	0	0	0	0	0	0	3	8	7	11	1	1	2	0	17	2	0	0	0
UP000016490	1321778	Clostridiales bacterium oral taxon 876 str. F0540	4702	0	0	0	4	1	0	1	0	0	0	4	1	1	4	0	0	0	1	2	0	0	0	0
UP000016494	1227266	Capnocytophaga sp. oral taxon 863 str. F0517	2778	1	0	1	1	1	0	1	0	0	0	2	0	0	0	0	0	0	1	2	0	0	0	0
UP000016495	1227261	Actinobaculum sp. oral taxon 183 str. F0552	2320	0	0	1	1	0	0	1	1	1	1	3	0	1	1	0	0	1	0	2	1	0	0	0
UP000016497	1386079	Alcaligenes sp. EGD-AK7	3984	1	0	1	3	0	0	0	0	0	0	6	5	11	5	2	0	3	2	11	4	0	0	0
UP000016498	1227262	Actinomyces johnsonii F0510	3391	1	1	1	2	0	0	1	1	2	1	6	0	1	1	0	1	0	0	2	1	0	0	0
UP000016509	1226325	Clostridium sp. KLE 1755	6954	1	0	1	4	1	0	3	0	0	0	8	2	3	3	0	2	0	1	4	4	0	0	0
UP000016519	1321816	Alloscardovia omnicolens F0580	1649	1	0	0	2	1	0	1	1	0	0	1	1	0	2	0	0	0	0	2	0	0	0	0
UP000016528	1117316	Pseudoalteromonas marina DSM 17587	3722	1	0	2	2	0	0	1	0	0	0	2	2	2	5	0	0	0	1	7	1	0	0	0
UP000016531	1321772	Aggregatibacter sp. oral taxon 458 str. W10330	2101	0	0	1	2	1	0	1	0	0	0	1	0	1	3	0	0	0	1	3	0	0	0	0
UP000016540	1318628	Marinobacter lipolyticus SM19	3620	1	1	1	2	1	0	1	0	0	0	4	6	4	4	0	2	4	1	9	1	0	0	3
UP000016543	314276	Idiomarina baltica OS145	2601	1	0	2	0	0	0	0	0	0	0	3	1	0	6	0	3	0	0	6	0	1	0	0
UP000016560	1215092	Pseudomonas alcaligenes NBRC 14159	4528	1	2	1	2	0	0	0	0	0	0	3	5	6	9	1	1	3	4	10	2	0	0	0
UP000016562	1219080	Vibrio ezurae NBRC 102218	3210	1	0	2	2	1	0	1	0	0	0	1	1	3	6	0	1	1	1	4	2	0	0	0
UP000016566	1337093	Limimaricola cinnabarinus LL-001	3801	1	1	1	0	0	0	2	1	0	1	5	4	12	6	0	2	0	2	10	2	0	0	0
UP000016567	1219077	Vibrio azureus NBRC 104587	4147	0	0	1	1	1	0	1	0	0	0	5	0	5	7	1	0	1	1	9	1	0	0	0
UP000016568	1219035	Novosphingobium tardaugens NBRC 16725	4005	1	1	1	1	0	0	0	0	0	0	5	8	39	7	3	8	8	1	11	0	0	0	0
UP000016569	1391729	Brevundimonas abyssalis TAR-001	2946	1	0	1	2	0	0	0	0	0	0	3	4	4	2	1	1	2	1	7	1	0	0	0
UP000016570	1219065	Vibrio proteolyticus NBRC 13287	4347	1	1	2	1	1	0	1	0	0	0	6	0	2	6	1	1	1	1	14	2	0	0	0
UP000016584	1346330	Sphingobacterium paucimobilis HER1398	4220	1	0	1	1	0	0	0	0	0	0	4	2	2	1	0	1	1	1	4	0	0	0	0
UP000016587	1121448	Desulfovibrio gigas DSM 1382 = ATCC 19364	3319	0	0	0	1	1	0	1	0	0	0	7	0	0	1	0	0	0	1	3	2	0	0	0
UP000016600	1081904	Prevotella pleuritidis F0068	2257	0	0	0	1	1	0	1	0	0	0	2	0	1	0	0	0	1	1	0	0	0	0	0
UP000016601	1226323	Oscillibacter sp. KLE 1745	4287	1	0	1	0	1	0	1	0	0	0	4	1	4	0	0	0	0	1	1	4	1	0	0
UP000016605	1358026	Leifsonia aquatica ATCC 14665	4862	1	2	1	2	0	0	1	2	1	1	3	4	8	3	0	1	2	1	10	0	0	0	0
UP000016614	1321781	Mitsuokella sp. oral taxon 131 str. W9106	2309	1	0	3	3	1	0	1	0	0	0	1	1	1	0	0	0	1	1	1	2	0	0	0
UP000016616	1335308	Burkholderia sp. AU4i	8649	1	2	1	3	0	0	1	0	0	1	6	4	26	19	2	5	3	3	39	3	0	0	0
UP000016617	1227275	Streptococcus sobrinus W1703	2206	0	0	0	2	0	0	1	0	0	0	1	0	2	0	0	0	0	1	2	3	0	0	0
UP000016618	1321784	Peptostreptococcaceae bacterium oral taxon 113 str. W5053	2325	0	0	0	1	1	0	1	0	0	0	0	1	1	0	0	0	3	0	0	1	1	0	0
UP000016626	888055	Leptotrichia wadei F0279	2277	0	0	0	2	1	1	0	0	0	0	2	0	1	0	0	1	0	1	1	1	0	0	0
UP000016628	1227272	Porphyromonas sp. oral taxon 278 str. W7784	1978	1	0	1	1	1	0	1	0	0	0	4	0	1	0	0	0	0	1	0	1	1	0	0
UP000016637	1321820	Gemella bergeriae ATCC 700627	1541	0	0	0	1	1	0	1	0	0	0	0	1	1	1	0	0	0	0	4	0	0	0	0
UP000016638	1125712	Olsenella profusa F0195	2650	0	0	0	2	1	0	2	0	0	0	2	0	5	0	0	0	0	1	1	3	0	0	0
UP000016640	1321779	Leptotrichia sp. oral taxon 215 str. W9775	2260	0	0	0	2	1	1	0	1	0	0	1	0	0	0	0	0	0	1	2	1	0	0	0
UP000016648	1115809	Prevotella baroniae F0067	2480	0	0	0	2	1	0	0	0	0	0	0	0	0	0	0	0	1	1	0	0	0	0	0
UP000016649	1321815	Treponema lecithinolyticum ATCC 700332	2175	1	0	0	0	0	1	0	0	0	0	2	0	0	0	0	2	0	0	2	2	0	0	0
UP000016652	1111135	Coriobacteriaceae bacterium BV3Ac1	1610	1	0	1	2	2	0	2	0	0	0	0	0	1	0	0	0	0	0	1	4	0	0	0
UP000016662	411473	Ruminococcus callidus ATCC 27760	3475	1	0	1	2	1	0	2	0	0	0	2	0	2	0	0	0	0	1	1	1	0	0	0
UP000016721	1294142	Clostridium intestinale URNW	4340	1	0	3	2	2	0	0	0	0	0	1	2	3	3	0	0	2	1	4	5	1	0	0
UP000016761	1354303	Psychrobacter aquaticus CMS 56	2814	1	2	1	1	0	0	0	0	0	0	3	2	8	1	0	1	1	2	8	2	0	0	1
UP000016842	1337887	Ochrobactrum intermedium 229E	4249	1	1	1	2	0	0	0	0	0	0	1	3	11	2	0	2	3	1	8	1	0	0	0
UP000016843	1123057	Rhodonellum psychrophilum GCM71 = DSM 17998	4904	1	0	2	2	1	0	1	0	0	0	9	2	10	4	0	1	2	2	5	0	1	0	0
UP000016848	1366046	Rhodobacteraceae bacterium HIMB11	3183	0	1	1	3	0	0	0	0	0	0	0	5	13	1	1	1	3	1	12	0	0	0	0
UP000016895	28173	Vibrio nigripulchritudo	5540	1	1	2	2	1	0	1	0	0	0	5	1	15	7	1	1	3	2	22	5	0	0	0
UP000016901	891974	Plautia stali symbiont	5007	1	0	2	5	1	0	1	2	0	0	1	0	5	4	0	3	0	0	6	3	0	0	0
UP000016943	1348662	Corynebacterium argentoratense DSM 44202	1870	0	2	1	4	0	0	1	0	0	1	4	2	1	1	0	0	0	1	5	0	0	0	0
UP000016960	582515	Rubidibacter lacunae KORDI 51-2	3455	1	1	0	4	1	1	1	0	0	0	7	0	3	6	0	1	0	3	4	1	0	0	0
UP000016981	1163302	Streptococcus anginosus T5	1729	0	0	0	2	1	0	1	0	0	0	2	1	1	0	0	0	0	1	1	2	0	0	0
UP000017023	1395125	Prevotella salivae F0493	2689	0	0	0	2	1	0	1	0	0	0	2	0	2	0	0	1	1	1	0	0	0	0	0
UP000017024	1348338	Leifsonia rubra CMS 76R	2670	1	0	1	2	0	0	0	0	0	0	2	3	5	1	0	0	2	1	13	1	0	0	0
UP000017048	1110697	Nocardia asteroides NBRC 15531	6459	1	2	1	3	1	1	1	1	0	1	8	9	13	28	0	5	10	7	14	1	0	0	3
UP000017050	1203578	Pseudomonas sp. HPB0071	5313	1	0	1	3	1	0	1	0	0	1	3	2	13	4	0	1	1	2	15	2	0	0	0
UP000017052	553198	Propionibacterium acidifaciens F0233	2906	1	0	1	1	0	0	1	1	1	1	3	0	6	2	0	1	1	2	1	2	0	0	0
UP000017081	1319815	Cetobacterium somerae ATCC BAA-474	2974	4	0	2	3	1	0	1	0	0	0	1	0	0	0	0	0	1	1	2	6	0	0	0
UP000017090	1111454	Megasphaera sp. BV3C16-1	2196	1	0	3	3	1	0	1	0	0	0	0	1	0	0	0	1	2	1	1	4	2	0	0
UP000017096	1203562	Corynebacterium sp. KPL1855	2285	0	3	2	3	0	0	0	1	0	0	4	0	2	2	0	0	0	0	5	0	0	0	0
UP000017102	1203622	Corynebacterium sp. KPL1989	2066	0	2	2	3	0	0	0	0	0	0	3	1	2	1	0	0	1	1	7	0	0	0	0
UP000017105	1111134	Peptoniphilus sp. BV3C26	1924	2	0	1	1	0	0	0	0	0	0	0	1	0	2	0	0	1	0	1	1	0	0	0
UP000017116	1397527	Alcanivorax sp. P2S70	3316	1	0	1	2	0	0	0	0	0	0	0	3	4	5	0	4	3	1	7	0	0	0	3
UP000017118	1345695	Clostridium saccharobutylicum DSM 13864	4355	0	0	0	5	1	0	1	0	0	0	3	2	1	2	0	0	0	1	5	4	0	0	0
UP000017119	1403316	Mycoplasma parvum str. Indiana	580	0	0	0	0	0	0	0	0	0	0	0	0	0	0	0	0	0	0	1	0	0	0	0
UP000017124	1156433	Streptococcus sp. I-P16	1891	0	0	0	2	1	0	1	1	0	0	2	0	2	0	0	0	0	1	1	2	0	0	0
UP000017131	1405498	Staphylococcus simulans UMC-CNS-990	2645	1	0	1	1	0	0	0	0	0	0	2	2	4	2	0	0	0	1	6	0	0	0	0
UP000017148	1313304	Chitinivibrio alkaliphilus ACht1	2304	1	0	0	1	1	0	1	0	0	0	2	0	0	1	0	0	0	2	2	2	0	0	0
UP000017152	1203560	Corynebacterium sp. KPL1821	2322	0	3	2	4	0	0	1	1	0	1	5	0	2	2	0	0	0	1	6	0	0	0	0
UP000017184	946483	Candidatus Symbiobacter mobilis CR	2609	1	0	1	4	0	0	1	0	0	0	1	0	1	0	0	0	0	1	1	1	0	0	0
UP000017395	1378168	Firmicutes bacterium ASF500	3472	0	0	0	5	1	0	1	0	0	0	3	1	2	0	0	0	1	1	1	1	0	0	0
UP000017396	1183438	Gloeobacter kilaueensis JS1	4462	1	0	1	10	0	1	1	0	0	0	12	0	3	9	0	1	0	2	3	2	0	0	0
UP000017404	1120928	Acinetobacter tjernbergiae DSM 14971 = CIP 107465	3483	2	0	1	2	0	0	0	0	0	0	1	2	4	6	0	1	2	1	8	1	0	0	1
UP000017415	1121864	Enterococcus cecorum DSM 20682 = ATCC 43198	2361	0	0	0	2	1	0	1	0	0	0	2	1	2	1	0	0	0	1	1	2	0	0	0
UP000017429	1379858	Mucispirillum schaedleri ASF457	2091	1	0	3	3	1	1	0	0	0	0	0	1	1	0	0	0	0	1	1	0	0	0	0
UP000017469	1266845	Carnobacterium inhibens subsp. gilichinskyi	2269	0	1	0	1	1	0	1	0	0	0	2	0	4	0	0	0	0	1	3	1	0	0	0
UP000017515	1385935	Leptolyngbya sp. Heron Island J	7108	1	2	0	5	2	1	1	0	0	0	15	1	7	9	0	3	0	6	5	1	0	0	0
UP000017536	1321814	Eubacterium brachy ATCC 33089	1479	0	0	0	0	0	0	0	0	0	0	0	0	0	1	0	0	0	1	2	0	1	0	0
UP000017590	1341692	Clostridium autoethanogenum DSM 10061	4013	0	0	0	5	0	0	0	0	0	0	3	1	1	0	0	0	0	0	1	7	0	0	0
UP000017640	1335757	Spiribacter curvatus	1861	1	1	1	0	0	0	0	0	0	0	4	1	3	1	0	1	1	1	8	2	0	0	0
UP000017642	1400053	Bacteroidales bacterium CF	2289	0	0	1	1	0	0	1	0	0	0	3	0	0	1	0	0	0	1	1	3	1	0	0
UP000017667	1217659	Acinetobacter haemolyticus CIP 64.3	3185	1	0	1	1	0	0	0	0	0	0	2	2	4	3	0	3	1	1	7	1	0	0	1
UP000017669	1125979	Rhizobium sp. PDO1-076	5347	1	2	0	2	2	0	1	0	0	0	2	3	18	10	1	3	1	1	17	3	0	0	0
UP000017700	104623	Serratia sp. ATCC 39006	4305	1	0	2	4	1	0	1	0	0	0	3	1	9	6	0	1	0	3	12	5	0	0	0
UP000017720	1273539	Streptococcus iniae IUSA1	2145	0	0	0	3	1	0	1	0	0	0	1	0	1	0	0	0	0	1	3	1	0	0	0
UP000017746	1246995	Actinoplanes friuliensis DSM 7358	8558	1	2	1	2	0	0	1	6	1	2	17	4	21	22	0	11	1	1	17	2	0	0	0
UP000017747	994573	Youngiibacter fragilis 232.1	3729	1	0	2	3	1	0	2	0	0	0	3	7	2	1	0	1	3	1	1	6	0	0	0
UP000017751	1260983	Leptospirillum sp. Group IV UBA BS	1878	0	0	0	3	0	1	1	2	1	2	2	0	1	0	0	0	0	1	0	0	0	0	0
UP000017765	1223307	Streptomyces sp. PVA 94-07	5894	1	1	2	4	0	0	1	1	1	1	3	4	13	11	0	2	4	10	16	1	0	0	0
UP000017805	1367477	Bacillus infantis NRRL B-14911	5066	1	0	1	2	2	0	1	0	0	0	6	5	10	4	0	2	0	1	9	0	0	0	0
UP000017808	1282363	Asticcacaulis sp. YBE204	3857	1	1	1	3	0	0	0	0	0	0	2	2	6	3	1	1	1	1	3	0	0	0	0
UP000017809	457396	Clostridium sp. 7_2_43FAA	3389	0	0	1	4	1	0	1	0	0	0	3	1	3	0	0	0	0	1	3	1	0	0	0
UP000017810	1410619	Serratia sp. DD3	4028	1	0	2	4	1	0	1	0	0	0	4	1	5	5	0	0	0	2	8	6	0	0	0
UP000017813	641147	Simonsiella muelleri ATCC 29453	2220	1	1	1	3	1	0	0	0	0	0	1	0	1	1	0	0	0	1	5	1	0	0	0
UP000017819	631454	Lutibaculum baratangense AMV1	4164	1	1	1	1	0	0	1	1	0	0	2	2	9	4	2	1	2	1	15	1	0	0	0
UP000017826	1282362	Asticcacaulis sp. AC466	4276	1	1	1	2	0	0	0	1	0	0	1	3	10	7	1	1	1	1	8	0	0	0	0
UP000017834	1399146	Enterobacter cloacae S611	3989	1	0	2	1	1	0	1	0	0	0	0	1	7	7	0	0	0	2	10	2	0	0	0
UP000017837	1121022	Asticcacaulis benevestitus DSM 16100 = ATCC BAA-896	4617	1	1	1	2	0	0	0	0	0	0	3	2	11	6	1	2	1	1	9	0	0	0	0
UP000017838	1408164	Betaproteobacteria bacterium MOLA814	2683	1	0	1	4	0	0	0	0	0	0	0	5	9	7	1	3	1	1	4	1	0	0	0
UP000017842	1116472	Methyloglobulus morosus KoM1	3732	1	1	1	3	2	0	2	0	0	0	2	1	4	3	0	0	0	1	3	0	0	0	0
UP000017862	1261131	Candidatus Liberibacter americanus str. Sao Paulo	978	0	0	0	1	0	0	0	0	0	0	0	0	2	0	0	0	0	1	0	0	0	0	0
UP000017881	1260251	Spiribacter salinus M19-40	1684	1	0	1	0	0	0	0	0	0	0	2	1	1	1	0	1	0	1	5	1	0	0	0
UP000017901	1262760	Brachyspira sp. CAG:700	2280	0	0	0	1	2	2	0	0	0	0	1	1	1	1	0	0	0	1	1	3	0	0	0
UP000017904	1262888	Eubacterium sp. CAG:274	2006	1	0	1	4	1	0	1	0	0	0	3	0	1	0	0	0	0	1	0	4	0	0	0
UP000017905	1262775	Clostridium sp. CAG:138	1746	0	0	1	1	1	0	1	0	0	0	1	0	0	1	0	0	0	0	0	0	0	0	0
UP000017906	1262750	Bacteroides sp. CAG:754	4054	1	0	1	3	1	0	1	0	0	0	5	0	3	0	0	1	1	0	1	1	0	0	0
UP000017907	1262753	Bacteroides sp. CAG:927	2231	0	0	0	3	1	0	1	0	0	0	6	0	0	1	0	0	0	1	0	3	1	0	0
[truncated: 6,283 more rows]
